# Supplementary material for: Synthesis and characterisation of a mixed-valence Mn13complex with S6symmetry by using 2-phenoxybenzoate
Source: Royal Society of Chemistry journal article supplement (doi:10.1039/b615856k), 2006-12-18
Supplement: b615856k.fcf [file b615856k.fcf]

#
# h,k,l, Fc-squared, Fo-squared, sigma(Fo-squared) and status flag
#
data_mm_mn13_publish
_shelx_title '  mm1 in R-3'
_shelx_refln_list_code          4
_shelx_F_calc_maximum      597.27
_exptl_crystal_F_000      5643.00
_reflns_d_resolution_high  0.6999
 
loop_
 _symmetry_equiv_pos_as_xyz
 'x, y, z'
 '-y, x-y, z'
 '-x+y, -x, z'
 'x+2/3, y+1/3, z+1/3'
 '-y+2/3, x-y+1/3, z+1/3'
 '-x+y+2/3, -x+1/3, z+1/3'
 'x+1/3, y+2/3, z+2/3'
 '-y+1/3, x-y+2/3, z+2/3'
 '-x+y+1/3, -x+2/3, z+2/3'
 '-x, -y, -z'
 'y, -x+y, -z'
 'x-y, x, -z'
 '-x+2/3, -y+1/3, -z+1/3'
 'y+2/3, -x+y+1/3, -z+1/3'
 'x-y+2/3, x+1/3, -z+1/3'
 '-x+1/3, -y+2/3, -z+2/3'
 'y+1/3, -x+y+2/3, -z+2/3'
 'x-y+1/3, x+2/3, -z+2/3'
 
_cell_length_a    27.7750
_cell_length_b    27.7750
_cell_length_c    17.7320
_cell_angle_alpha  90.000
_cell_angle_beta   90.000
_cell_angle_gamma 120.000
 
_shelx_F_squared_multiplier     1.000
 
loop_
 _refln_index_h
 _refln_index_k
 _refln_index_l
 _refln_F_squared_calc
 _refln_F_squared_meas
 _refln_F_squared_sigma
 _refln_observed_status
  -4   5   0     9117.89    25671.33    689.95 o
  -1   5   0    20448.68    26927.90   1239.14 o
  -3   6   0    69371.96    65093.29   1334.96 o
   0   6   0    77935.80   104354.88   6754.15 o
  -5   7   0     2660.01     8851.98    231.22 o
  -2   7   0     3238.75     6715.77    271.38 o
  -7   8   0    70373.27    66365.43   1601.21 o
  -4   8   0    11907.78    22852.04    421.25 o
  -1   8   0     7912.90     5676.83    233.05 o
  -6   9   0     3457.47     1918.07     79.72 o
  -3   9   0    35612.43    54464.93   1484.96 o
   0   9   0     4786.41     4384.58    186.96 o
  -8  10   0    15093.34    14066.69    350.17 o
  -5  10   0     6334.60    11484.78    287.43 o
  -2  10   0     1774.91     3306.87    132.63 o
 -10  11   0     7890.89    10876.75    297.82 o
  -7  11   0     4633.52     6772.05    208.27 o
  -4  11   0    68839.63    70278.71   2074.62 o
  -1  11   0      121.52       -8.49     42.31 o
  -9  12   0     8351.51     8172.31    236.53 o
  -6  12   0    12736.96    11746.94    331.36 o
  -3  12   0     7998.52     7744.27    194.45 o
   0  12   0    13965.46    17033.00    541.10 o
 -11  13   0     1018.47     1132.03     81.69 o
  -8  13   0    11793.31    12397.08    351.09 o
  -5  13   0     1288.68      714.86     72.23 o
  -2  13   0     4350.60     3995.17    212.42 o
 -13  14   0   156314.02   159047.83   4526.16 o
 -10  14   0     1063.44     1537.80     97.26 o
  -7  14   0     7148.53     7733.06    267.32 o
  -4  14   0     5274.94     5224.28    143.87 o
  -1  14   0      236.43       53.43     50.25 o
 -12  15   0   134153.33   137416.64   3402.15 o
  -9  15   0    25631.90    27806.69    808.19 o
  -6  15   0    46820.38    44055.93   1431.42 o
  -3  15   0    19317.43    22369.07    584.09 o
   0  15   0   133762.80   132671.70   3980.71 o
 -14  16   0   282616.78   278814.50  13765.13 o
 -11  16   0     7059.58     5561.94    164.07 o
  -8  16   0     4214.99     4584.98    150.84 o
  -5  16   0     2643.16     3126.86    126.19 o
  -2  16   0    18938.00    17551.49    548.35 o
 -16  17   0   226513.53   222074.86   5961.34 o
 -13  17   0    82004.88    86226.97   1720.68 o
 -10  17   0     8432.43     8443.74    205.40 o
  -7  17   0    10576.41    12737.06    470.36 o
  -4  17   0     1229.32      671.99     92.12 o
  -1  17   0    28572.17    29601.22    596.34 o
 -15  18   0   253012.44   252303.48   5490.27 o
 -12  18   0       92.69       -8.03     44.60 o
  -9  18   0     8999.83     9196.72    247.37 o
  -6  18   0     7460.41     8415.81    234.48 o
  -3  18   0     2618.24     3339.45    203.12 o
   0  18   0    45160.99    42736.52   1493.21 o
 -17  19   0    77880.97    74704.51   2467.89 o
 -14  19   0    71085.52    73456.84   1993.86 o
 -11  19   0     3647.30     3342.25    184.23 o
  -8  19   0    47145.01    52082.66   1427.92 o
  -5  19   0     3827.67     3502.85    177.27 o
  -2  19   0       12.91       22.10     55.41 o
 -19  20   0     3065.63     3592.18    199.05 o
 -16  20   0    43605.73    36388.17   1006.50 o
 -13  20   0     2213.27     1813.59    127.51 o
 -10  20   0     5834.51     4207.88    192.91 o
  -7  20   0    18071.13    18734.00    670.38 o
  -4  20   0      604.32      430.11     87.38 o
  -1  20   0    11327.32    12219.93    483.32 o
 -18  21   0    16938.82    17551.02    650.00 o
 -15  21   0     2754.86     2799.04    172.74 o
 -12  21   0      501.54      844.45     98.78 o
  -9  21   0      940.35      381.13     84.62 o
  -6  21   0     3045.60     2888.72    177.73 o
  -3  21   0      349.15      409.88     93.17 o
   0  21   0     3337.46     3656.76    229.60 o
 -20  22   0     4363.76     4065.98    237.12 o
 -17  22   0     4184.51     5198.82    248.96 o
 -14  22   0     1407.93      379.31    106.09 o
 -11  22   0       37.17      -36.49     50.99 o
  -8  22   0      924.04      723.70    108.65 o
  -5  22   0     2530.97     3631.45    203.20 o
  -2  22   0    18372.06    18895.45    463.54 o
 -22  23   0      199.22      128.12     87.64 o
 -19  23   0      355.92      395.47    105.06 o
 -16  23   0    24999.67    26438.87    691.50 o
 -13  23   0      505.18      526.45    120.01 o
 -10  23   0     3201.92     2514.89    188.83 o
  -7  23   0     8820.42     8059.53    356.11 o
  -4  23   0       25.73       23.90     67.16 o
  -1  23   0     3056.73     3038.33    220.90 o
 -21  24   0     2141.71     1590.62    176.56 o
 -18  24   0      269.39      221.28     92.14 o
 -15  24   0     3741.52     3690.51    369.65 o
 -12  24   0     2939.89     2301.29    208.20 o
  -9  24   0      619.09      833.01    131.04 o
  -6  24   0      499.38      453.64    101.77 o
  -3  24   0     1088.32     1233.17    158.97 o
   0  24   0      338.55      489.39    120.02 o
 -23  25   0     4186.02     4025.71    258.11 o
 -20  25   0      391.27      428.98    112.47 o
 -17  25   0     9041.53     8490.68    412.00 o
 -14  25   0     3716.82     4543.32    276.72 o
 -11  25   0     1231.59     1246.31    153.28 o
  -8  25   0    14348.76    13917.74    560.35 o
  -5  25   0      830.70      900.62    152.29 o
  -2  25   0     1476.89     2290.42    208.85 o
 -25  26   0     7303.13     8613.55    389.96 o
 -22  26   0     6961.77     6595.58    296.77 o
 -19  26   0     2281.38     2820.34    239.51 o
 -16  26   0     7230.48     7099.54    334.65 o
 -13  26   0       69.59      407.93    117.51 o
 -10  26   0      355.76      164.98     84.47 o
  -7  26   0     2706.98     2540.27    229.83 o
  -4  26   0     1349.44     1232.50    178.32 o
  -1  26   0     1053.58      564.63    138.97 o
 -24  27   0     1380.79     1404.85    193.40 o
 -21  27   0       11.39      -14.38     81.32 o
 -18  27   0     3945.60     4365.88    285.65 o
 -15  27   0      118.24       21.22     80.58 o
 -12  27   0      621.87      601.70    136.48 o
  -9  27   0      365.98      162.55     88.51 o
  -6  27   0     1292.48     1827.98    203.09 o
  -3  27   0      179.88      193.36    105.54 o
   0  27   0      900.81     1348.46    197.22 o
 -26  28   0       71.96       57.17     87.92 o
 -23  28   0     3419.25     4083.88    292.88 o
 -20  28   0       12.41      -57.08     67.47 o
 -17  28   0      164.95      137.18     92.90 o
 -14  28   0        8.66       54.00     85.09 o
 -11  28   0     7989.80     8989.48    368.93 o
  -8  28   0     2206.87     1865.12    212.08 o
  -5  28   0     1327.66     1830.99    212.18 o
  -2  28   0     3066.87     3722.23    290.73 o
 -28  29   0     2999.94     3032.35    304.40 o
 -25  29   0     4821.84     4891.39    321.28 o
 -22  29   0     3723.38     4155.96    306.43 o
 -19  29   0     1403.57     1602.72    202.49 o
 -16  29   0     3814.21     3183.07    265.07 o
 -13  29   0    12063.42    13656.25    742.49 o
 -10  29   0    17762.05    18226.96    962.73 o
  -7  29   0      113.42       -7.42     76.28 o
  -4  29   0     3446.48     3353.22    276.85 o
  -1  29   0     1014.03      934.92    173.37 o
 -27  30   0    11833.39    12129.49    505.17 o
 -24  30   0      509.95      319.11    122.32 o
 -21  30   0      344.49      464.68    129.18 o
 -18  30   0     4636.36     4220.80    299.66 o
 -15  30   0     6763.43     6647.09    445.26 o
 -12  30   0    17381.15    17216.59    836.97 o
  -9  30   0     3710.75     3643.99    310.71 o
  -6  30   0      156.27      248.11    115.11 o
  -3  30   0      179.73      131.99    108.02 o
   0  30   0      178.95      185.79    125.13 o
 -29  31   0     5347.50     4755.50    368.07 o
 -26  31   0     4986.44     5466.60    346.95 o
 -23  31   0     2324.44     2368.45    247.08 o
 -20  31   0      628.39      468.89    136.10 o
 -17  31   0      451.71      346.22    125.03 o
 -14  31   0    14543.13    14350.01    715.45 o
 -11  31   0    15830.15    14037.36    837.62 o
  -8  31   0      619.61      567.24    153.19 o
  -5  31   0      982.19      958.13    176.22 o
  -2  31   0      184.11      308.88    121.91 o
 -31  32   0      712.43      912.82    219.37 o
 -28  32   0    10928.32    11161.88    501.06 o
 -25  32   0      107.20      -58.61     79.87 o
 -22  32   0     2917.27     2507.81    254.87 o
 -19  32   0      167.58      150.05    101.41 o
 -16  32   0      449.47      602.31    148.33 o
 -13  32   0    15859.01    13900.18    722.27 o
 -10  32   0     2524.99     2300.41    266.94 o
  -7  32   0      684.54      749.08    178.79 o
  -4  32   0     1596.22     1563.43    242.63 o
  -1  32   0        0.55      -92.57     92.57 o
 -30  33   0     4215.75     4914.84    425.47 o
 -27  33   0     5335.84     6011.27    451.82 o
 -24  33   0      242.55      406.58    133.43 o
 -21  33   0     1038.82     1614.48    215.69 o
 -18  33   0        3.97      -13.63     84.97 o
 -15  33   0     4147.05     4213.69    339.92 o
 -12  33   0     4040.62     3495.97    317.88 o
  -9  33   0      299.40      265.50    124.69 o
  -6  33   0     6398.95     6509.67    742.52 o
  -3  33   0      382.20      382.56    150.55 o
   0  33   0       52.73       12.82    124.80 o
 -32  34   0     1674.77     1727.41    282.68 o
 -29  34   0     4639.62     4939.73    387.44 o
 -26  34   0       61.39       89.68    106.22 o
 -23  34   0      128.87      136.11    110.47 o
 -20  34   0     3970.73     3671.57    299.64 o
 -17  34   0      434.99      393.74    142.38 o
 -14  34   0     3607.61     3803.51    330.77 o
 -11  34   0      462.40      437.58    165.37 o
  -8  34   0     1513.53     1420.81    256.70 o
  -5  34   0     4118.54     4327.92    405.48 o
  -2  34   0      385.35      418.50    177.49 o
 -31  35   0     2005.06     2054.89    308.54 o
 -28  35   0     1885.62     1803.20    261.00 o
 -25  35   0      574.30      970.24    186.00 o
 -22  35   0     6272.81     6315.06    453.75 o
 -19  35   0     1194.17     1211.89    217.78 o
 -16  35   0      467.33      672.01    193.66 o
 -13  35   0     6369.82     5748.36    442.77 o
 -10  35   0      103.14      127.99    154.48 o
  -7  35   0     1448.35     1200.55    248.61 o
  -4  35   0      143.02      168.04    161.18 o
 -30  36   0     2338.82     2467.03    341.13 o
 -27  36   0        0.98      -83.38     83.38 o
 -24  36   0      398.55      281.01    138.24 o
 -21  36   0     3468.05     3356.51    397.85 o
 -18  36   0      195.49      201.83    140.05 o
 -15  36   0     4964.30     4948.99    423.74 o
 -12  36   0      630.97      580.95    186.35 o
  -9  36   0      250.23      110.46    130.06 o
  -6  36   0       54.15      -57.24    101.55 o
 -29  37   0     1175.09     1183.79    291.78 o
 -26  37   0      308.77      296.66    148.63 o
 -23  37   0      408.87      225.24    135.76 o
 -20  37   0      205.24      116.22    120.30 o
 -17  37   0      868.48      781.36    207.12 o
 -14  37   0     3665.24     3518.15    379.12 o
 -11  37   0        3.12       42.90    130.19 o
  -8  37   0      135.13       16.24    122.92 o
 -28  38   0      127.00       89.76    151.79 o
 -25  38   0      129.34      146.93    122.07 o
 -22  38   0       64.74       34.69    121.69 o
 -19  38   0        2.22      -13.95    108.30 o
 -16  38   0     2177.63     2107.74    315.79 o
 -13  38   0     1073.49     1257.87    255.35 o
 -10  38   0      618.83      500.20    186.31 o
 -24  39   0      298.96      423.17    173.15 o
 -21  39   0      819.51      824.39    213.37 o
 -18  39   0      541.77      390.39    167.23 o
 -15  39   0     2003.65     2107.70    331.31 o
  -2   3   1    68084.27    31032.81    832.48 o
   1   3   1     8293.71     1656.26     73.02 o
  -7   4   1    35945.65    44957.11   1526.37 o
  -4   4   1   115599.05    92659.17   1152.44 o
  -1   4   1     2002.80      211.10     30.58 o
   2   4   1    33775.82    13471.83    328.12 o
  -9   5   1     7975.65     3726.94    107.09 o
  -3   5   1      551.11       47.42     26.07 o
   3   5   1    15698.01    10521.98    259.30 o
 -11   6   1      966.71     1452.59     81.50 o
  -8   6   1     6427.66     7517.82    228.85 o
  -5   6   1   100801.38   108521.27   6772.32 o
  -2   6   1     3375.06     7233.37    244.04 o
   1   6   1       35.53      291.19     35.22 o
   4   6   1    41137.55    47672.00    969.98 o
 -13   7   1    18668.59    20022.47    637.22 o
 -10   7   1    19759.24    14134.12    420.78 o
  -7   7   1     3403.28     1783.35     75.06 o
  -4   7   1    10804.83    16351.56    361.42 o
  -1   7   1   132941.11   111681.02   9376.60 o
   2   7   1   113018.10   112721.86   2810.09 o
   5   7   1      553.55      472.57     65.02 o
 -15   8   1    52279.42    61204.88   2023.75 o
 -12   8   1    37046.95    26237.77    903.83 o
  -9   8   1    23412.24    32045.39    889.62 o
  -6   8   1   118823.20   105014.95   3122.06 o
  -3   8   1    18103.52    11246.40    258.53 o
   0   8   1    46049.68    40630.61   1735.60 o
   3   8   1    29343.66    26885.56    649.04 o
   6   8   1   179421.20   180762.98   4891.57 o
 -17   9   1    42896.66    44635.39   1366.83 o
 -14   9   1   100724.23   115949.47   3600.85 o
 -11   9   1    12674.68    11946.05    525.21 o
  -8   9   1    80210.67   103941.71   3171.95 o
  -5   9   1   107328.46   100395.85   3587.87 o
  -2   9   1     6234.04     4102.16    126.35 o
   1   9   1     7680.30     4487.41    168.94 o
   4   9   1    14200.60    15296.58    279.11 o
   7   9   1     8414.00     6099.77    170.59 o
 -19  10   1    92313.75   106109.96   3416.35 o
 -16  10   1       74.16       57.99     44.91 o
 -13  10   1    52567.81    52791.69   1934.89 o
 -10  10   1    43695.12    43879.20   1286.00 o
  -7  10   1      243.20      338.02     51.22 o
  -4  10   1   128995.83   138205.81   4847.80 o
  -1  10   1    49560.11    48020.09   1660.15 o
   2  10   1    35935.05    38254.98    996.87 o
   5  10   1        3.53      241.81     55.22 o
   8  10   1     3636.31     4221.68    160.18 o
 -21  11   1    14812.21    17182.41    633.31 o
 -18  11   1    97581.91    96954.91   2996.94 o
 -15  11   1    17245.25    16526.23    579.53 o
 -12  11   1      194.49       52.66     44.37 o
  -9  11   1     1362.39     1451.12     85.75 o
  -6  11   1   105827.52    99034.40   3513.02 o
  -3  11   1    53589.89    47163.08   1759.03 o
   0  11   1      242.14      299.44     66.11 o
   3  11   1    12148.13    10634.76    275.76 o
   6  11   1     1052.39     1000.29     90.68 o
   9  11   1    13859.29    15966.94    419.36 o
 -23  12   1      149.81       73.60     69.82 o
 -20  12   1   127451.77   142744.75   4985.79 o
 -17  12   1     8808.93    12615.81    414.35 o
 -14  12   1    35019.49    37537.59   1349.49 o
 -11  12   1     8352.91     9543.26    369.21 o
  -8  12   1    30769.30    38059.74    887.05 o
  -5  12   1    33037.47    37889.51   1076.53 o
  -2  12   1    18997.97    15039.41    415.74 o
   1  12   1    24661.50    27741.68   1137.32 o
   4  12   1     2591.07     2814.36    124.61 o
   7  12   1    13903.59    15962.17    291.14 o
  10  12   1     1119.19      804.34    108.85 o
 -25  13   1     1289.03     1637.52    190.81 o
 -22  13   1    23636.72    24105.39    840.54 o
 -19  13   1    18908.66    18394.14    592.73 o
 -16  13   1      784.23      620.23     73.78 o
 -13  13   1     2596.82     2681.98    116.15 o
 -10  13   1      566.16      557.77     68.76 o
  -7  13   1    42270.75    60827.79   1983.53 o
  -4  13   1    18949.62    19702.68    709.62 o
  -1  13   1      184.50       87.19     52.91 o
   2  13   1    75970.19    71651.27   2483.21 o
   5  13   1    34938.00    38845.40    861.45 o
   8  13   1     2951.81     2875.15    189.54 o
  11  13   1     1578.43     1226.87    167.12 o
 -27  14   1      400.53      395.93    121.51 o
 -24  14   1      536.82      634.71    119.70 o
 -21  14   1     5888.45     5853.75    220.66 o
 -18  14   1      696.03     1045.67    113.36 o
 -15  14   1    15666.62    13703.09    456.69 o
 -12  14   1    96071.84    98253.19   2797.11 o
  -9  14   1        7.88       30.01     42.75 o
  -6  14   1     1374.90     1132.12     85.75 o
  -3  14   1     7174.31     6435.61    273.20 o
   0  14   1    47815.29    50252.11   1636.49 o
   3  14   1   215090.69   213394.52   5944.33 o
   6  14   1      703.98      516.19     91.21 o
   9  14   1      437.95      694.05    119.37 o
  12  14   1       85.51      115.94     88.89 o
 -29  15   1     5042.19     5241.42    315.69 o
 -26  15   1     6573.16     6375.54    380.77 o
 -23  15   1       12.85      -39.28     59.42 o
 -20  15   1       17.57       47.09     58.73 o
 -17  15   1      708.02      758.06    100.09 o
 -14  15   1   112671.84   110151.52   2773.25 o
 -11  15   1    70627.30    69590.80   1725.02 o
  -8  15   1     3302.07     3782.46    137.12 o
  -5  15   1    22821.04    24201.58    624.62 o
  -2  15   1      346.62      267.67     66.27 o
   1  15   1   171364.91   172139.47   5885.89 o
   4  15   1    65404.62    67028.13   1337.36 o
   7  15   1    12133.71     9758.29    327.47 o
  10  15   1      268.40      700.84    138.99 o
  13  15   1     3121.05     2831.36    243.55 o
 -31  16   1     5885.91     6878.91    414.19 o
 -28  16   1    17646.31    16402.24    667.22 o
 -25  16   1       34.94       -6.58     67.46 o
 -22  16   1     3567.65     3628.99    200.27 o
 -19  16   1        8.56      -12.33     53.34 o
 -16  16   1    46886.86    49025.26   1514.17 o
 -13  16   1   187938.42   187467.05   5015.89 o
 -10  16   1      743.28     1338.67     99.24 o
  -7  16   1       40.77      208.28     60.15 o
  -4  16   1     6646.81     5206.78    183.84 o
  -1  16   1    55684.65    63866.75   1514.63 o
   2  16   1   109768.67   110192.70   3352.86 o
   5  16   1      163.79      229.64     84.65 o
   8  16   1     5464.50     6394.18    271.38 o
  11  16   1        8.14       36.75     80.57 o
  14  16   1      717.52      513.21    133.73 o
 -33  17   1      361.57      416.10    131.39 o
 -30  17   1    23055.31    20380.93    961.13 o
 -27  17   1     7256.00     7711.31    443.37 o
 -24  17   1     8735.44    11125.64    350.01 o
 -21  17   1     2762.33     1988.02    158.99 o
 -18  17   1     4175.98     3995.53    189.21 o
 -15  17   1   140429.52   147353.77   4892.78 o
 -12  17   1    29083.56    29668.32    879.09 o
  -9  17   1    13849.86    14888.48    337.69 o
  -6  17   1    10308.90    12946.33    394.68 o
  -3  17   1      194.57      329.60     73.73 o
   0  17   1    31028.30    37099.25    996.38 o
   3  17   1     8044.85     8911.42    306.28 o
   6  17   1      178.12      -61.24     61.24 o
   9  17   1     6558.05     6468.85    312.91 o
  12  17   1     9508.32     9104.47    380.62 o
  15  17   1       76.64      -62.63     82.44 o
 -35  18   1       81.11       21.11     95.43 o
 -32  18   1     7903.03     7332.08    461.67 o
 -29  18   1    14956.55    14574.24    699.89 o
 -26  18   1      292.20      247.32     96.85 o
 -23  18   1     8680.56     8122.93    275.07 o
 -20  18   1     5457.96     5269.30    237.16 o
 -17  18   1    53063.72    50594.92   1575.55 o
 -14  18   1   104896.37   112642.81   2636.84 o
 -11  18   1     6778.34     6327.72    187.56 o
  -8  18   1     2747.76     3957.13    153.66 o
  -5  18   1     3087.98     2388.96    150.96 o
  -2  18   1      116.05       34.72     53.94 o
   1  18   1     1585.46     1578.19    158.56 o
   4  18   1     5304.37     6064.87    273.24 o
   7  18   1      163.20       90.34     82.32 o
  10  18   1     3501.45     3157.03    261.01 o
  13  18   1     4269.98     3763.00    289.85 o
  16  18   1       95.43      124.81    109.21 o
 -37  19   1       45.64       36.45    113.88 o
 -34  19   1      282.28      206.39    124.30 o
 -31  19   1    15231.38    16111.18    634.72 o
 -28  19   1     1964.77     1883.27    213.78 o
 -25  19   1     3336.08     3939.92    243.72 o
 -22  19   1     1787.46     2202.88    188.67 o
 -19  19   1        2.92      -41.09     53.11 o
 -16  19   1    41767.02    44916.56   1194.27 o
 -13  19   1     8186.68     7745.50    214.11 o
 -10  19   1     7289.27     7854.48    239.51 o
  -7  19   1     3931.38     4387.97    187.58 o
  -4  19   1    13920.65    12470.04    535.97 o
  -1  19   1     4569.44     4664.16    208.05 o
   2  19   1      922.36      713.54    123.46 o
   5  19   1     9595.15    10257.48    343.03 o
   8  19   1      289.37      652.26    141.50 o
  11  19   1    10834.90    10477.08    485.12 o
  14  19   1      349.43      215.00    112.73 o
  17  19   1     1082.33      702.85    177.48 o
 -39  20   1       12.38      -22.08    108.16 o
 -36  20   1       50.78       92.67    111.52 o
 -33  20   1     2617.21     2713.50    293.44 o
 -30  20   1     4844.67     4693.44    340.93 o
 -27  20   1     1410.64     1201.10    174.32 o
 -24  20   1       67.66       10.69     67.02 o
 -21  20   1     5051.09     3733.67    227.00 o
 -18  20   1     4410.36     5099.59    217.23 o
 -15  20   1     9433.34    10552.41    395.41 o
 -12  20   1     8352.34     7536.26    253.26 o
  -9  20   1      182.31      192.23     68.83 o
  -6  20   1     1297.63     1527.86    138.04 o
  -3  20   1       92.36       24.56     57.53 o
   0  20   1     3260.67     3968.19    280.67 o
   3  20   1    12632.58    14664.75    404.97 o
   6  20   1      144.54       76.35     89.50 o
   9  20   1     6082.30     4775.01    307.34 o
  12  20   1      570.98      815.28    161.53 o
  15  20   1     4430.23     4445.98    338.41 o
  18  20   1        1.07        8.39    112.34 o
 -38  21   1     1005.38     1207.89    251.08 o
 -35  21   1     1801.00     1704.69    245.84 o
 -32  21   1     5298.24     5060.37    360.80 o
 -29  21   1     2771.40     3267.15    266.06 o
 -26  21   1     2580.60     2688.74    237.77 o
 -23  21   1     8745.13     9653.23    332.11 o
 -20  21   1     1807.88     1777.83    159.09 o
 -17  21   1     1953.84     1840.02    155.70 o
 -14  21   1      840.97      749.67    109.16 o
 -11  21   1    14294.09    13961.59    451.88 o
  -8  21   1       14.21       -9.17     53.86 o
  -5  21   1     5195.28     5193.17    234.56 o
  -2  21   1     2660.90     2478.55    195.02 o
   1  21   1      618.51     1096.29    150.18 o
   4  21   1      269.16       73.46     82.14 o
   7  21   1     1602.67     1656.47    203.47 o
  10  21   1     3563.41     3296.59    279.93 o
  13  21   1     7247.44     7260.93    586.78 o
  16  21   1     2050.02     1608.94    249.85 o
 -37  22   1     2091.72     2010.72    306.35 o
 -34  22   1      784.34      839.29    188.51 o
 -31  22   1        6.21       -0.35     95.96 o
 -28  22   1    14398.36    13068.92    449.66 o
 -25  22   1       34.81      -14.83     82.09 o
 -22  22   1      447.94      239.86     94.28 o
 -19  22   1      511.67      335.78     96.68 o
 -16  22   1       19.42       65.18     63.17 o
 -13  22   1     6276.69     7360.43    346.43 o
 -10  22   1    11646.78    10819.92    377.59 o
  -7  22   1    12842.30    14182.62    396.77 o
  -4  22   1     6926.36     7058.09    398.29 o
  -1  22   1    24059.02    25553.09    685.34 o
   2  22   1      163.39       -9.72     70.31 o
   5  22   1     1313.76      913.60    161.91 o
   8  22   1     8650.00     8617.01    392.07 o
  11  22   1        5.00      -17.76     83.69 o
  14  22   1     9847.50    10050.53    508.42 o
  17  22   1       54.69      -18.24    114.82 o
 -39  23   1     1145.03     1416.42    268.51 o
 -36  23   1     1657.85     1434.52    261.77 o
 -33  23   1      971.11     1169.04    209.19 o
 -30  23   1     3669.15     4192.69    299.67 o
 -27  23   1     2570.81     1994.37    220.07 o
 -24  23   1      619.95      829.69    141.21 o
 -21  23   1     1045.62     1474.06    165.76 o
 -18  23   1     4973.77     4841.29    252.91 o
 -15  23   1    16369.19    15107.29    437.02 o
 -12  23   1     6509.20     6284.65    258.66 o
  -9  23   1     3609.83     3681.08    203.09 o
  -6  23   1    15216.13    14473.39    527.62 o
  -3  23   1    20958.53    21579.27    958.75 o
   0  23   1     1083.68      676.40    132.52 o
   3  23   1     5351.93     5200.71    290.72 o
   6  23   1     4583.08     4399.95    304.96 o
   9  23   1     7239.72     7344.59    378.91 o
  12  23   1     6043.83     6529.64    378.56 o
  15  23   1     1288.97     1474.67    304.43 o
 -38  24   1      589.06      872.46    220.74 o
 -35  24   1      182.70      128.43    118.62 o
 -32  24   1       69.29      -18.56     86.97 o
 -29  24   1    11441.73    12026.53    526.45 o
 -26  24   1     1277.15      848.32    156.50 o
 -23  24   1      889.24      440.73    111.99 o
 -20  24   1       95.31      151.13     85.75 o
 -17  24   1    37121.57    36499.07   1301.40 o
 -14  24   1      239.76      123.75     88.04 o
 -11  24   1    14337.40    14751.16    585.76 o
  -8  24   1     5860.90     5798.33    240.29 o
  -5  24   1     2201.37     2933.26    212.74 o
  -2  24   1    21931.71    20828.35    571.53 o
   1  24   1     2931.58     2876.46    232.23 o
   4  24   1       66.42      -10.38     77.27 o
   7  24   1     6451.33     6013.50    356.06 o
  10  24   1      230.69      429.99    139.83 o
  13  24   1     2983.19     3344.11    294.07 o
 -37  25   1      521.62      498.28    184.89 o
 -34  25   1     1106.00     1158.35    239.66 o
 -31  25   1        3.05        8.50     87.16 o
 -28  25   1    11122.75    11001.13    484.43 o
 -25  25   1      709.77      976.65    166.60 o
 -22  25   1     2465.12     3234.90    235.11 o
 -19  25   1    30780.32    33340.60   1340.24 o
 -16  25   1    20621.41    24387.82    852.81 o
 -13  25   1     4450.21     4223.18    302.41 o
 -10  25   1     2670.19     2934.31    214.11 o
  -7  25   1     3326.99     3366.03    225.90 o
  -4  25   1     6804.00     8080.05    357.03 o
  -1  25   1      964.40      686.03    132.64 o
   2  25   1      518.58      602.69    132.43 o
   5  25   1      318.75      327.17    125.67 o
   8  25   1      269.34      189.45    113.14 o
  11  25   1      612.64      787.69    172.76 o
  14  25   1      328.74      339.43    172.22 o
 -36  26   1      368.07      241.88    154.39 o
 -33  26   1     8560.20     9261.78    456.63 o
 -30  26   1      827.46      985.06    176.19 o
 -27  26   1     6180.92     6938.09    355.29 o
 -24  26   1     1769.63     2039.30    207.29 o
 -21  26   1      996.27     1154.60    174.27 o
 -18  26   1     8220.06     9741.92    385.93 o
 -15  26   1      962.65     1114.89    171.56 o
 -12  26   1     9326.28     8990.80    361.24 o
  -9  26   1     2212.01     2463.36    206.76 o
  -6  26   1      326.57      435.11    124.39 o
  -3  26   1     8228.09     7480.27    334.43 o
   0  26   1      395.91      169.91     95.70 o
   3  26   1     2556.35     2909.73    269.18 o
   6  26   1      159.63       39.61     92.54 o
   9  26   1       91.17       67.44    112.72 o
  12  26   1      236.97      158.57    140.70 o
 -38  27   1      155.30      -21.31    119.70 o
 -35  27   1     4082.95     5239.44    441.29 o
 -32  27   1     4107.55     3602.99    302.35 o
 -29  27   1     6490.06     6254.18    358.27 o
 -26  27   1     4366.28     5140.31    324.91 o
 -23  27   1     1587.50     1812.29    208.48 o
 -20  27   1     8650.50     8917.51    368.53 o
 -17  27   1    26423.90    27169.23   1237.87 o
 -14  27   1      610.72      770.80    147.80 o
 -11  27   1      980.32      934.76    153.84 o
  -8  27   1      722.98      772.87    146.66 o
  -5  27   1     1722.33     1780.03    209.17 o
  -2  27   1      420.63      456.47    130.39 o
   1  27   1     1253.01      958.21    160.58 o
   4  27   1     3564.88     3793.05    303.19 o
   7  27   1      336.35      212.16    131.78 o
  10  27   1      165.65      153.00    127.38 o
 -37  28   1      441.86      464.89    183.63 o
 -34  28   1    13799.87    15683.84    778.35 o
 -31  28   1        1.18       -3.51     92.63 o
 -28  28   1     3353.36     2783.40    265.69 o
 -25  28   1       79.58      140.31     99.42 o
 -22  28   1     2957.64     3194.94    265.82 o
 -19  28   1    12750.58    13199.63    600.85 o
 -16  28   1       14.04       15.93     90.82 o
 -13  28   1       20.95        2.77     82.82 o
 -10  28   1     5137.81     5490.27    433.86 o
  -7  28   1      358.13      353.96    119.93 o
  -4  28   1        1.66      -51.24     76.01 o
  -1  28   1        0.16      -14.40     84.57 o
   2  28   1     4478.94     5480.18    381.01 o
   5  28   1     5206.21     5495.66    486.79 o
   8  28   1     1038.48      936.33    223.49 o
 -36  29   1     2402.98     2515.55    330.56 o
 -33  29   1     4793.76     4817.56    346.86 o
 -30  29   1     1290.85     1561.61    239.77 o
 -27  29   1     1375.69     1604.62    234.05 o
 -24  29   1     3841.59     4538.12    309.69 o
 -21  29   1      113.23      194.81     99.76 o
 -18  29   1      116.98      221.42    109.22 o
 -15  29   1      173.12      159.30     97.92 o
 -12  29   1     1164.44     1165.96    196.90 o
  -9  29   1     9234.58     8829.96    473.17 o
  -6  29   1        9.67       -6.87     78.49 o
  -3  29   1       13.38       69.11     88.65 o
   0  29   1      289.77      149.03    115.32 o
   3  29   1     6627.46     8622.30    528.64 o
   6  29   1     1869.37     2026.34    303.04 o
 -35  30   1     2778.60     2762.77    348.45 o
 -32  30   1      110.07       51.82    110.97 o
 -29  30   1       35.93       16.34     91.21 o
 -26  30   1     8258.53     7523.53    579.11 o
 -23  30   1     1921.55     2186.48    235.46 o
 -20  30   1       39.83       19.36     87.37 o
 -17  30   1       78.04       39.35     85.36 o
 -14  30   1     6035.94     6752.60    338.33 o
 -11  30   1    11872.60    11271.65    809.85 o
  -8  30   1     1657.88     1452.92    214.00 o
  -5  30   1      275.26      261.63    112.10 o
  -2  30   1       11.83       71.63    101.83 o
   1  30   1      465.85      541.31    182.20 o
   4  30   1     1536.37     1487.98    270.87 o
   7  30   1      454.06      703.37    211.34 o
 -34  31   1       98.26       51.86    139.29 o
 -31  31   1       34.58       71.20    111.31 o
 -28  31   1     8603.13     8315.36    637.04 o
 -25  31   1     2493.27     1914.54    232.30 o
 -22  31   1        0.23      -14.59     83.25 o
 -19  31   1      774.31      695.06    150.48 o
 -16  31   1      682.88      789.28    160.58 o
 -13  31   1    21592.37    23005.14   2016.59 o
 -10  31   1     4310.81     4577.33    343.60 o
  -7  31   1     1782.70     1942.46    252.97 o
  -4  31   1     2953.17     2298.14    274.54 o
  -1  31   1      687.43      567.24    188.83 o
   2  31   1      761.39      659.60    198.78 o
   5  31   1      882.36      963.79    231.90 o
 -36  32   1       13.45      -77.64    134.45 o
 -33  32   1       36.95       53.44    123.19 o
 -30  32   1     2613.94     2385.39    287.41 o
 -27  32   1     9212.95     9334.14    455.84 o
 -24  32   1        2.46      -54.92     82.35 o
 -21  32   1        0.82      -16.13     84.31 o
 -18  32   1        6.15      -31.77     76.43 o
 -15  32   1     2282.65     2554.82    278.65 o
 -12  32   1    10345.45     8997.00    787.04 o
  -9  32   1      264.63      334.51    149.70 o
  -6  32   1     4846.55     5305.99    465.87 o
  -3  32   1     1159.06     1156.96    210.15 o
   0  32   1        8.98      -20.89    108.43 o
   3  32   1      861.36      898.69    227.72 o
 -35  33   1        2.60       69.94    145.56 o
 -32  33   1      339.09      383.21    165.28 o
 -29  33   1     5691.95     5750.41    404.63 o
 -26  33   1     2232.68     1809.42    234.33 o
 -23  33   1       68.27       84.79     99.29 o
 -20  33   1      954.50      807.50    165.47 o
 -17  33   1        2.23       32.65    108.69 o
 -14  33   1     3374.12     2919.39    329.85 o
 -11  33   1      345.23      390.91    164.92 o
  -8  33   1      584.36      701.90    197.25 o
  -5  33   1     4025.32     4339.13    362.08 o
  -2  33   1      404.66      391.94    165.35 o
   1  33   1      374.01      437.16    173.45 o
 -34  34   1      227.41      259.66    156.16 o
 -31  34   1      787.79      779.65    185.48 o
 -28  34   1     5820.78     6361.67    470.02 o
 -25  34   1      183.96      197.92    117.98 o
 -22  34   1     2572.80     3279.27    321.00 o
 -19  34   1      298.01      318.38    153.09 o
 -16  34   1        2.59      -65.84     92.10 o
 -13  34   1     1836.81     1852.37    286.26 o
 -10  34   1       74.55      -39.37    116.44 o
  -7  34   1      763.01      879.56    210.98 o
  -4  34   1        7.33      -96.02     96.02 o
  -1  34   1      143.17      129.90    130.09 o
 -33  35   1      614.35      358.69    193.35 o
 -30  35   1     1462.51     1797.22    295.97 o
 -27  35   1       84.31       99.93    128.41 o
 -24  35   1      163.72       69.89    113.97 o
 -21  35   1     3354.41     3316.59    319.49 o
 -18  35   1       15.47       11.33    106.45 o
 -15  35   1      577.98      300.59    166.80 o
 -12  35   1      294.34      364.90    167.93 o
  -9  35   1      275.50      177.91    145.31 o
  -6  35   1       99.26       60.89    125.15 o
  -3  35   1     1173.04     1185.03    288.95 o
 -32  36   1      222.36      114.16    159.99 o
 -29  36   1      530.25      519.43    186.64 o
 -26  36   1     1892.48     2178.51    288.27 o
 -23  36   1      564.79      719.03    180.42 o
 -20  36   1      494.39      521.58    179.97 o
 -17  36   1       57.95       13.31    119.25 o
 -14  36   1     3441.50     4353.71    465.43 o
 -11  36   1       52.53      -44.46    105.16 o
  -8  36   1     1203.10      872.73    221.50 o
  -5  36   1     1914.96     1567.84    285.49 o
 -28  37   1        2.51       41.19    122.01 o
 -25  37   1     1220.64     1630.70    257.11 o
 -22  37   1        1.95      -85.49     90.21 o
 -19  37   1      222.28       87.95    125.58 o
 -16  37   1     2151.41     1830.59    295.83 o
 -13  37   1     1320.11     1430.78    262.85 o
 -10  37   1     2527.38     3106.45    364.44 o
  -7  37   1     2794.72     2744.89    352.52 o
 -27  38   1     1469.33     1479.67    275.52 o
 -24  38   1      554.92      463.54    177.61 o
 -21  38   1      862.76      897.99    220.27 o
 -18  38   1      187.67      120.74    125.74 o
 -15  38   1     2343.08     2492.34    337.81 o
 -12  38   1        0.85       -6.42    111.49 o
 -23  39   1     1673.35     1674.81    282.02 o
 -20  39   1      623.13      617.11    192.44 o
 -17  39   1     1772.83     1623.91    283.23 o
 -14  39   1     2787.89     2918.60    357.41 o
   0   1   2    18680.25    41658.75    652.58 o
  -2   2   2    11160.84     6563.38    160.72 o
  -4   3   2    13954.44     8590.64    236.18 o
  -1   3   2      850.47     1697.29     89.52 o
  -6   4   2   110527.61   105089.84   5417.73 o
  -3   4   2    20273.48    14517.61    441.93 o
   0   4   2    23084.90    20766.33    576.96 o
   3   4   2    36785.61    52097.91   1803.91 o
  -8   5   2    25440.77    31371.07    889.83 o
  -5   5   2    49643.79    42553.63   1055.57 o
  -2   5   2    82352.76   103815.72   8912.14 o
   4   5   2    15923.50    17085.08    439.97 o
 -10   6   2     2801.98     4529.17    176.19 o
  -7   6   2      156.59       42.17     31.90 o
  -4   6   2     8112.61     9622.92    269.68 o
  -1   6   2    36413.71    43986.32   1240.78 o
   2   6   2    80225.23    91590.92   2572.33 o
   5   6   2     5144.52     3860.13    111.36 o
 -12   7   2    19482.71    19801.66    633.98 o
  -9   7   2     2841.84     3507.26    141.62 o
  -6   7   2     9332.34    15532.58    356.29 o
  -3   7   2    18792.84    24605.10    750.51 o
   0   7   2    11287.61    11053.48    311.87 o
   3   7   2     3911.94     7212.20    134.79 o
   6   7   2   127050.83   127030.52   2852.18 o
 -14   8   2   122748.77   136394.58   3404.32 o
 -11   8   2    10889.12    10048.85    331.38 o
  -8   8   2      153.99      193.53     42.47 o
  -5   8   2    59201.98    79586.61   2399.34 o
  -2   8   2   147547.95   150977.80   4754.89 o
   1   8   2       17.09       98.49     32.48 o
   4   8   2   125628.07   118954.36   3201.51 o
   7   8   2    13745.67    16861.54    433.54 o
 -16   9   2     4313.39     3651.46    139.92 o
 -13   9   2    95513.26   104379.44   3318.76 o
 -10   9   2    50624.48    56823.50   1763.02 o
  -7   9   2     2418.18     4906.57    227.11 o
  -1   9   2    23362.11    30415.32    952.91 o
   2   9   2    20726.73    25586.33    705.91 o
   5   9   2    44850.09    40917.91   1131.17 o
   8   9   2    30724.64    27793.71    642.51 o
 -18  10   2    56296.01    60784.07   1618.94 o
 -15  10   2    10938.71    12202.27    321.65 o
 -12  10   2    13006.58    17203.58    603.51 o
  -9  10   2    91396.38    81310.77   2288.59 o
  -6  10   2   146615.25   127014.02   5735.94 o
  -3  10   2   114784.38   111153.74   3695.13 o
   0  10   2      100.82      106.10     48.64 o
   3  10   2    15325.88    17603.47    369.61 o
   6  10   2      148.34      199.88     52.08 o
   9  10   2    18576.18    17151.92    519.78 o
 -20  11   2   102251.31   113512.20   3245.78 o
 -17  11   2    21194.21    19770.78    618.90 o
 -14  11   2    60273.58    53338.66   1539.60 o
 -11  11   2     7265.78     8538.95    282.11 o
  -8  11   2      776.78     1216.90     83.61 o
  -5  11   2    71687.73    65510.67   1967.72 o
  -2  11   2    29515.76    32461.17    850.28 o
   1  11   2        0.22      293.57     62.04 o
   4  11   2      382.07      708.04     75.24 o
   7  11   2     4283.89     3364.60    140.35 o
  10  11   2    14780.12    15165.39    503.95 o
 -22  12   2    29145.26    30281.21    996.45 o
 -19  12   2   149214.61   157049.27   4955.35 o
 -16  12   2     2028.45     3711.21    145.00 o
 -13  12   2     4115.20     6627.34    200.32 o
 -10  12   2     4663.30     6743.41    230.05 o
  -7  12   2    71698.18    68423.61   2071.34 o
  -4  12   2      795.84      530.73     60.15 o
  -1  12   2     3228.18     2420.67    125.54 o
   2  12   2     3563.44     2500.89    129.81 o
   5  12   2      660.64      386.20     63.50 o
   8  12   2     5636.13     6562.73    219.19 o
  11  12   2     1987.88     1475.18    175.57 o
 -24  13   2     1597.62     1635.21    184.75 o
 -21  13   2    56327.58    58875.11   1570.56 o
 -18  13   2    93393.48   101105.88   3751.44 o
 -15  13   2     8076.92     9122.61    366.93 o
 -12  13   2     1115.79      867.99     82.44 o
  -9  13   2    22505.71    18755.21    502.81 o
  -6  13   2      446.26     1623.71     96.12 o
  -3  13   2    30767.28    30866.86   1059.52 o
   0  13   2    16222.20    16541.60    447.51 o
   3  13   2    28660.90    26429.57    811.11 o
   6  13   2      237.03      195.76     63.64 o
   9  13   2     5743.91     5303.20    293.08 o
  12  13   2       15.42      -46.84     68.75 o
 -26  14   2      696.19      757.35    143.63 o
 -23  14   2    10718.49    11124.01    387.84 o
 -20  14   2    24279.59    21624.93    642.02 o
 -17  14   2      744.99     1440.81    107.93 o
 -14  14   2    14841.24    17670.26    688.20 o
 -11  14   2    30985.07    28194.24    981.31 o
  -8  14   2    14101.45    12252.11    337.43 o
  -5  14   2     3337.24     1471.34     89.49 o
  -2  14   2     2889.24     3007.74    144.34 o
   1  14   2    85282.80    83158.14   1778.32 o
   4  14   2    22764.11    22053.41    796.43 o
   7  14   2      640.29      757.33    117.94 o
  10  14   2      174.22      122.02     89.00 o
  13  14   2     2013.79     1613.64    199.35 o
 -28  15   2     2287.90     2684.90    241.80 o
 -25  15   2     4301.51     3981.21    243.61 o
 -22  15   2       64.53       51.01     72.43 o
 -19  15   2      103.49      165.29     67.39 o
 -16  15   2       30.13      -14.67     42.49 o
 -13  15   2    43602.09    46472.47   1551.25 o
 -10  15   2    30375.04    32068.44    919.99 o
  -7  15   2     3215.70     4942.29    152.89 o
  -4  15   2     7333.66    10035.42    437.22 o
  -1  15   2      382.75      481.91     81.55 o
   2  15   2    45718.31    46567.78   1286.58 o
   5  15   2    19150.19    15774.63    410.24 o
   8  15   2     4182.18     3480.63    251.79 o
  11  15   2      485.00      398.81    115.47 o
  14  15   2      749.39      718.92    150.41 o
 -30  16   2     4456.11     4263.88    299.65 o
 -27  16   2    12622.99    11987.12    552.10 o
 -24  16   2     2203.32     2260.33    192.58 o
 -21  16   2      636.20      688.30    106.97 o
 -18  16   2    23729.39    21229.89    726.59 o
 -15  16   2    19006.94    18373.05    565.88 o
 -12  16   2    47690.11    55793.11   1466.17 o
  -9  16   2    32799.05    34568.50    970.49 o
  -6  16   2    13629.45    13617.32    536.16 o
  -3  16   2     8506.65     8539.20    275.97 o
   0  16   2     2259.92     1463.73    122.81 o
   3  16   2      625.35      866.87    123.22 o
   6  16   2      213.63      128.57     80.38 o
   9  16   2     7947.22     9300.19    456.81 o
  12  16   2      674.59      928.75    161.03 o
  15  16   2      300.30      264.46    115.26 o
 -32  17   2      236.12      245.93    107.78 o
 -29  17   2    16551.02    17037.35   1038.77 o
 -26  17   2     1270.35     1504.89    202.49 o
 -23  17   2      667.32      368.06     99.06 o
 -20  17   2     2481.53     1927.66    155.18 o
 -17  17   2      180.47      301.76     85.50 o
 -14  17   2    30807.72    28918.39    864.64 o
 -11  17   2       72.38       10.92     42.36 o
  -8  17   2      750.65      701.49     82.86 o
  -5  17   2      883.58      899.65    101.73 o
  -2  17   2      591.50      297.36     78.01 o
   1  17   2     8382.91     8901.88    288.13 o
   4  17   2       24.06      244.75     87.93 o
   7  17   2      692.83      443.65    108.53 o
  10  17   2     2278.48     2253.68    227.04 o
  13  17   2     8772.55     8435.62    449.02 o
  16  17   2     1439.12     1450.22    206.23 o
 -34  18   2     1216.28     1322.63    205.45 o
 -31  18   2     5562.98     5942.02    437.70 o
 -28  18   2     3490.89     3361.44    263.66 o
 -25  18   2     3722.73     3396.97    231.11 o
 -22  18   2       86.45      101.51     68.63 o
 -19  18   2     4092.24     3918.89    199.59 o
 -16  18   2     3565.38     3982.86    190.28 o
 -13  18   2    14256.41    11924.58    386.64 o
 -10  18   2     7089.63     8827.04    252.69 o
  -7  18   2    43807.63    42627.39   1260.80 o
  -4  18   2    13235.03    13869.16    551.04 o
  -1  18   2     5167.81     4864.42    198.96 o
   2  18   2    24060.01    23926.18    806.01 o
   5  18   2     1982.77     3392.60    225.95 o
   8  18   2    23842.27    25413.08    872.47 o
  11  18   2     2386.92     2681.24    278.87 o
  14  18   2     1143.93     1153.71    186.98 o
  17  18   2        0.06      -29.73     86.14 o
 -36  19   2     1322.66     1544.56    238.81 o
 -33  19   2       21.67       13.47     97.16 o
 -30  19   2    10470.83    10230.53    408.42 o
 -27  19   2     2285.46     2187.70    202.87 o
 -24  19   2     1108.86     1724.93    174.67 o
 -21  19   2      492.83      562.13    102.58 o
 -18  19   2     4753.26     4995.15    212.60 o
 -15  19   2     4722.24     5283.39    184.79 o
 -12  19   2     1752.16     1566.91    117.65 o
  -9  19   2     7650.45     7114.42    213.30 o
  -6  19   2     3488.90     3311.76    173.27 o
  -3  19   2     6241.32     7199.98    244.90 o
   0  19   2    17947.63    16279.97    418.33 o
   3  19   2      159.89      146.89     83.35 o
   6  19   2       58.58       92.74     79.94 o
   9  19   2     3570.65     3636.63    273.78 o
  12  19   2     8619.39     8517.45    551.63 o
  15  19   2      722.28      602.32    145.55 o
  18  19   2      131.05       36.96    106.57 o
 -38  20   2       99.60       74.93    118.75 o
 -35  20   2     1297.66     1053.96    203.14 o
 -32  20   2      727.87      803.10    173.94 o
 -29  20   2      438.33      612.18    159.74 o
 -26  20   2      506.23      389.74    107.65 o
 -23  20   2    12550.56    11074.20    435.64 o
 -20  20   2    11821.17    10421.45    325.79 o
 -17  20   2    11508.55    13136.40    375.60 o
 -14  20   2     2920.14     3282.35    161.57 o
 -11  20   2    10007.39     9873.85    246.27 o
  -8  20   2     3854.64     3356.82    178.48 o
  -5  20   2    14939.79    14100.82    398.88 o
  -2  20   2     7697.72     7709.35    280.70 o
   1  20   2     1517.32     1999.17    183.07 o
   4  20   2      480.35      413.02    119.28 o
   7  20   2      607.78      517.56    131.53 o
  10  20   2     4334.34     4716.94    314.77 o
  13  20   2      804.21     1214.87    189.21 o
  16  20   2     1938.11     1516.40    216.23 o
  19  20   2       13.00      -58.61    108.97 o
 -37  21   2       19.80       28.58    102.63 o
 -34  21   2      501.66      525.49    156.00 o
 -31  21   2      199.37       77.20    102.75 o
 -28  21   2    11498.04    10622.41    508.09 o
 -25  21   2     3222.55     3424.94    256.79 o
 -22  21   2     1357.60     1507.32    155.53 o
 -19  21   2     1052.55     1517.81    148.47 o
 -16  21   2     9522.42     9464.84    324.30 o
 -13  21   2    19404.14    20328.59    659.30 o
 -10  21   2      145.21      135.78     67.76 o
  -7  21   2      175.43      122.47     67.91 o
  -4  21   2      398.96      334.31     86.40 o
  -1  21   2    10469.22     8173.22    342.06 o
   2  21   2      367.20      538.84    117.89 o
   5  21   2      147.35      497.11    113.91 o
   8  21   2     2534.26     2360.07    242.00 o
  11  21   2      469.92      520.63    143.91 o
  14  21   2    12009.77    11379.19    504.80 o
  17  21   2     1346.54     1451.77    241.81 o
 -39  22   2      526.71      551.63    188.86 o
 -36  22   2        9.02       36.91    101.36 o
 -33  22   2       41.66      -27.04     92.03 o
 -30  22   2     4390.62     4689.24    345.32 o
 -27  22   2    11913.43    10573.67    404.16 o
 -24  22   2     5797.85     6631.03    319.59 o
 -21  22   2       43.21       37.08     67.54 o
 -18  22   2     7306.04     6546.22    245.98 o
 -15  22   2      278.78     1386.39    139.98 o
 -12  22   2    40049.22    40523.20   1275.12 o
  -9  22   2     6261.71     7155.47    314.98 o
  -6  22   2    15237.39    14387.93    622.19 o
  -3  22   2    27797.24    28275.66    952.28 o
   0  22   2    24929.43    25192.85    736.18 o
   3  22   2       13.66       -9.68     71.13 o
   6  22   2     1439.90     1431.25    196.72 o
   9  22   2     7544.52     7558.91    369.51 o
  12  22   2     6099.64     5554.02    354.66 o
  15  22   2     7541.50     7489.78    522.59 o
 -38  23   2      945.44      715.45    201.27 o
 -35  23   2        5.08      -29.40     95.31 o
 -32  23   2      532.01      386.05    139.95 o
 -29  23   2    11507.03    10549.37    438.20 o
 -26  23   2       40.93      -11.31     79.62 o
 -23  23   2       40.24      100.40     79.57 o
 -20  23   2       65.76      -63.03     63.03 o
 -17  23   2    17372.71    21362.58    541.94 o
 -14  23   2       57.56      158.45     81.26 o
 -11  23   2     6353.25     7977.81    444.76 o
  -8  23   2     3391.73     4011.50    208.44 o
  -5  23   2      290.23      430.26    106.85 o
  -2  23   2    57418.60    55995.91   2527.04 o
   1  23   2     2513.93     3485.21    243.18 o
   4  23   2     3032.27     3313.00    245.69 o
   7  23   2    14027.86    13861.02    647.17 o
  10  23   2        8.25       -2.96     87.57 o
  13  23   2     7881.32     8281.33    448.93 o
  16  23   2     2326.96     2594.06    348.79 o
 -37  24   2      187.84      233.54    135.46 o
 -34  24   2       57.74       49.50    108.52 o
 -31  24   2     1417.74     1147.04    205.25 o
 -28  24   2    10406.13    10426.09    414.07 o
 -25  24   2     2573.11     2404.50    236.01 o
 -22  24   2        1.31       49.72     72.95 o
 -19  24   2    40278.68    41762.63   1679.01 o
 -16  24   2    57743.23    60542.17   2067.43 o
 -13  24   2     5645.03     4802.96    243.25 o
 -10  24   2     6560.52     8702.67    390.23 o
  -7  24   2     4839.51     5814.31    264.02 o
  -4  24   2    14461.10    12243.88    453.38 o
  -1  24   2    34948.91    38032.23   1253.16 o
   2  24   2     2368.80     2769.47    230.95 o
   5  24   2     1676.22     1516.55    202.75 o
   8  24   2     3402.01     3855.38    303.98 o
  11  24   2     2509.82     2863.15    306.35 o
  14  24   2     4350.31     4235.65    415.67 o
 -39  25   2      249.55      258.56    157.88 o
 -36  25   2      125.79       52.36    101.46 o
 -33  25   2     2259.16     2200.19    300.47 o
 -30  25   2     1244.59     1156.29    186.45 o
 -27  25   2     3228.57     2536.43    247.46 o
 -24  25   2       83.46       48.53     79.60 o
 -21  25   2        8.52       28.54     74.84 o
 -18  25   2    50458.77    48160.42   1593.87 o
 -15  25   2    30148.66    29031.72    821.09 o
 -12  25   2     6705.39     6501.49    345.55 o
  -9  25   2     1249.65     1687.03    162.27 o
  -6  25   2     1407.17     1365.52    177.97 o
  -3  25   2    35978.38    34531.21   1109.22 o
   0  25   2     1172.43     1005.61    159.09 o
   3  25   2      297.40      568.15    130.48 o
   6  25   2       28.08       22.66     88.08 o
   9  25   2       61.76       14.00    101.34 o
  12  25   2     2640.77     3175.07    330.57 o
 -38  26   2      610.73      379.34    176.21 o
 -35  26   2     1529.15     1815.54    262.30 o
 -32  26   2     7719.91     8519.76    437.20 o
 -29  26   2     4215.35     4008.03    299.57 o
 -26  26   2     2160.60     1286.85    189.34 o
 -23  26   2      246.32      172.59     92.27 o
 -20  26   2    16225.10    16649.72    632.82 o
 -17  26   2    29606.10    29443.72   1041.79 o
 -14  26   2     7271.45     6924.56    348.30 o
 -11  26   2    12246.23    10328.69    602.82 o
  -8  26   2       45.42      -65.95     65.95 o
  -5  26   2     7135.73     6793.64    299.72 o
  -2  26   2    16398.54    14727.52    543.68 o
   1  26   2       30.02       50.37     79.79 o
   4  26   2      833.42      630.69    161.02 o
   7  26   2        4.74       28.92     98.81 o
  10  26   2      123.73       62.08    110.24 o
 -37  27   2     1902.98     1699.84    288.80 o
 -34  27   2    15396.71    15408.75    717.90 o
 -31  27   2     1690.70     1191.74    192.33 o
 -28  27   2     7146.07     6407.34    359.56 o
 -25  27   2     1146.33     1088.27    194.66 o
 -22  27   2      121.53       92.29     93.05 o
 -19  27   2    40703.43    37969.69   1408.96 o
 -16  27   2     8801.58     9599.38    638.94 o
 -13  27   2      199.30      107.18     91.19 o
 -10  27   2       16.76      -41.65     70.59 o
  -7  27   2      353.05      630.91    138.66 o
  -4  27   2     8200.63     9504.75    442.98 o
  -1  27   2     1169.84      731.95    140.70 o
   2  27   2     1247.46     1454.71    206.63 o
   5  27   2      749.06     1021.86    200.26 o
   8  27   2        0.44      -31.80    104.40 o
  11  27   2      357.89      510.57    159.22 o
 -36  28   2     5406.80     5412.75    405.53 o
 -33  28   2    13059.26    12905.96    610.28 o
 -30  28   2       12.15      104.30    102.91 o
 -27  28   2     1843.69     1872.17    242.61 o
 -24  28   2      196.30      291.09    114.47 o
 -21  28   2     2636.53     2814.27    253.99 o
 -18  28   2    10769.29    12024.64    455.14 o
 -15  28   2      112.48       -9.65     78.80 o
 -12  28   2       21.96       -2.97     78.04 o
  -9  28   2     3240.81     2812.00    245.25 o
  -6  28   2      726.73      899.43    161.02 o
  -3  28   2     4173.18     3809.90    317.54 o
   0  28   2      215.36      131.18    134.96 o
   3  28   2     1611.25     1546.43    234.56 o
   6  28   2        6.23       62.74    105.54 o
   9  28   2        7.16       20.03    105.82 o
 -35  29   2     6967.38     7182.83    512.20 o
 -32  29   2     1040.02      878.80    180.02 o
 -29  29   2     3253.73     3408.81    320.75 o
 -26  29   2      314.84       95.74    107.23 o
 -23  29   2     5516.94     6453.56    348.16 o
 -20  29   2     4628.02     4584.19    305.00 o
 -17  29   2       45.07      -34.72     79.14 o
 -14  29   2     1219.66      978.73    167.61 o
 -11  29   2     2900.15     3052.53    281.96 o
  -8  29   2      749.17      638.36    141.12 o
  -5  29   2     1094.78     1547.22    228.16 o
  -2  29   2      982.35     1030.45    196.05 o
   1  29   2      413.19      381.91    158.26 o
   4  29   2     1359.62     1546.81    264.95 o
   7  29   2      235.66       68.24    130.79 o
 -37  30   2     2545.16     2957.51    369.79 o
 -34  30   2     3215.83     2837.60    355.96 o
 -31  30   2      749.90      859.17    191.82 o
 -28  30   2      183.22      539.60    159.00 o
 -25  30   2     3229.65     3689.39    324.21 o
 -22  30   2     2386.19     3242.13    275.52 o
 -19  30   2      283.19      106.41     98.43 o
 -16  30   2      102.88       90.39     95.26 o
 -13  30   2     1871.82     2211.21    257.14 o
 -10  30   2     1796.86     2125.26    276.59 o
  -7  30   2       46.87       -4.60     87.99 o
  -4  30   2      534.25      521.99    154.19 o
  -1  30   2      177.48      139.36    114.40 o
   2  30   2      164.19      235.45    146.29 o
   5  30   2        2.79      -16.76    112.11 o
 -36  31   2      915.04      818.24    255.05 o
 -33  31   2        0.09        0.19    103.51 o
 -30  31   2       51.13       48.48    106.44 o
 -27  31   2     5628.98     6210.99    406.37 o
 -24  31   2     1132.52     1169.49    186.10 o
 -21  31   2      124.66      121.21    102.71 o
 -18  31   2      258.64      186.97    103.64 o
 -15  31   2      179.05       70.26    106.45 o
 -12  31   2     4458.84     4683.13    447.98 o
  -9  31   2        4.34       26.58     98.54 o
  -6  31   2     1819.57     1903.86    248.09 o
  -3  31   2     1154.30     1257.99    223.47 o
   0  31   2        6.59      -91.78     91.78 o
   3  31   2       13.51      -23.26    113.35 o
 -35  32   2        1.75      -29.86    136.00 o
 -32  32   2        4.37      -24.61    103.94 o
 -29  32   2     2023.79     2470.78    293.27 o
 -26  32   2     2392.18     1917.72    258.85 o
 -23  32   2        2.61       -1.21     88.47 o
 -20  32   2      684.25      538.77    154.37 o
 -17  32   2      730.38      369.13    145.82 o
 -14  32   2     1912.76     1598.60    261.44 o
 -11  32   2        5.30       -4.71    102.56 o
  -8  32   2      415.08      273.30    143.37 o
  -5  32   2     7479.52     7567.12    473.08 o
  -2  32   2       34.24       59.67    110.79 o
   1  32   2      140.19       86.69    130.17 o
   4  32   2      181.43      226.18    173.90 o
 -34  33   2      217.74      152.73    140.28 o
 -31  33   2       37.42       57.91    123.84 o
 -28  33   2     4074.16     3512.09    365.09 o
 -25  33   2       23.98       47.48    102.22 o
 -22  33   2      291.92      140.42    111.34 o
 -19  33   2        5.31       -5.35     81.31 o
 -16  33   2      859.12      845.45    205.12 o
 -13  33   2        3.08      -64.27     93.27 o
 -10  33   2      256.34      138.06    126.19 o
  -7  33   2     3320.29     2601.85    326.19 o
  -4  33   2     2253.00     1926.79    265.73 o
  -1  33   2      619.61      646.46    195.89 o
   2  33   2      184.68      203.91    148.58 o
 -33  34   2      160.30      158.48    143.91 o
 -30  34   2      243.45      161.51    128.94 o
 -27  34   2     1135.60      658.97    192.89 o
 -24  34   2       50.41      -78.55     78.55 o
 -21  34   2     3135.11     3109.86    426.57 o
 -18  34   2      418.28      362.63    150.31 o
 -15  34   2     1529.90     1200.88    240.11 o
 -12  34   2      144.99       52.58    118.21 o
  -9  34   2       17.00       22.27    113.34 o
  -6  34   2     2767.63     2854.87    344.22 o
  -3  34   2      415.25      501.43    180.23 o
   0  34   2      334.66      282.76    164.09 o
 -32  35   2      200.54      147.66    139.22 o
 -29  35   2       94.15       79.73    127.08 o
 -26  35   2      222.84      213.58    145.74 o
 -23  35   2     2785.87     2851.43    309.47 o
 -20  35   2     1150.09     1173.43    239.44 o
 -17  35   2     2734.68     2328.87    304.58 o
 -14  35   2       25.60       63.65    118.62 o
 -11  35   2     1112.12      908.54    255.79 o
  -8  35   2       73.91       44.36    127.50 o
  -5  35   2       34.43      116.17    135.96 o
  -2  35   2     1467.07     1468.38    278.39 o
 -31  36   2      244.98      288.61    152.46 o
 -28  36   2      163.67      378.50    168.83 o
 -25  36   2      428.87      227.79    129.65 o
 -22  36   2     1918.01     1931.24    292.71 o
 -19  36   2      748.22      707.48    193.90 o
 -16  36   2        7.94       -5.20    108.56 o
 -13  36   2      285.06      412.79    165.73 o
 -10  36   2      726.18      578.73    187.04 o
  -7  36   2      323.51      250.32    155.98 o
  -4  36   2      929.10      951.73    264.39 o
 -30  37   2       45.67      -70.09    103.57 o
 -27  37   2     1851.96     2134.93    307.37 o
 -24  37   2        6.39       11.96    108.85 o
 -21  37   2       31.85      -35.30    107.24 o
 -18  37   2      978.37      885.31    217.29 o
 -15  37   2      154.45       98.71    130.46 o
 -12  37   2        0.40      -49.53    108.57 o
  -9  37   2     1758.29     1516.34    271.30 o
 -26  38   2     1463.69      904.38    259.16 o
 -23  38   2       54.71      -11.47    106.26 o
 -20  38   2      924.90      884.83    220.11 o
 -17  38   2      185.52      380.92    162.13 o
 -14  38   2     2908.80     3324.24    374.25 o
 -11  38   2     1262.22     1063.71    238.70 o
 -25  39   2      867.74      939.66    266.82 o
 -22  39   2     1181.98     1110.70    241.80 o
 -19  39   2        1.39       30.63    117.92 o
 -16  39   2     3764.17     3991.33    463.02 o
   0   0   3      901.62      145.12     48.54 o
   1   1   3    37635.92    37913.13   1053.80 o
  -1   2   3     4309.23     3130.06    117.25 o
   3   3   3    62235.24    82951.82   2437.61 o
  -5   4   3    21427.59    15474.21    409.93 o
   1   4   3   138954.75   155358.11   1932.31 o
   4   4   3   103682.63   103037.71   2769.37 o
  -7   5   3    27587.25    26330.09    799.55 o
  -4   5   3     5647.46     7906.78    299.38 o
  -1   5   3    83549.28    79012.97   4492.92 o
   2   5   3    22162.44    18577.55    691.86 o
   5   5   3    82038.89    94585.07   2951.65 o
  -9   6   3    38816.59    50757.91   1475.13 o
  -6   6   3    24480.93    25299.16    746.40 o
   0   6   3    17161.48    24430.83    846.74 o
   3   6   3      357.29      862.93     72.05 o
   6   6   3    43449.50    44451.80   1645.02 o
 -11   7   3   150266.80   156425.53   5346.03 o
  -8   7   3    36707.59    43509.64   1347.54 o
  -5   7   3    43450.29    42072.41   1265.82 o
  -2   7   3   103305.97   120460.09   5723.61 o
   1   7   3    18709.32    20672.85    517.53 o
   4   7   3     2151.28     2285.36    119.45 o
   7   7   3     1455.24     1114.26     85.11 o
 -13   8   3     1952.02     3585.07    128.56 o
 -10   8   3    95323.99   110242.66   2990.90 o
  -7   8   3    14013.85    14224.57    374.43 o
  -4   8   3   190479.16   192570.81   2437.49 o
  -1   8   3    79212.65    88733.61   2607.52 o
   2   8   3     1026.00     1340.63     87.82 o
   5   8   3     8208.22    10946.44    343.80 o
   8   8   3      502.82      819.73     78.20 o
 -15   9   3    12043.04     8601.54    236.19 o
 -12   9   3    57600.99    66826.91   2165.19 o
  -9   9   3     6170.97     9641.15    399.45 o
  -6   9   3     4932.79     8597.86    329.05 o
  -3   9   3   193397.05   193528.22  34277.93 o
   0   9   3      921.42      921.78     62.55 o
   3   9   3    27924.90    22256.56    547.01 o
   6   9   3       27.15      218.32     60.89 o
   9   9   3    27576.41    33699.16   1058.32 o
 -17  10   3     6881.96     6716.13    241.04 o
 -14  10   3      159.57      100.54     49.54 o
 -11  10   3    36682.76    31987.08   1214.28 o
  -8  10   3     3591.01     2399.56    113.48 o
  -5  10   3    36805.46    44053.99   1263.92 o
  -2  10   3   117445.70   125780.07   4487.87 o
   1  10   3     8555.44     8354.49    333.41 o
   4  10   3       21.18      289.18     63.11 o
   7  10   3     1105.61     1109.56     84.80 o
  10  10   3    29883.42    27437.06    778.63 o
 -19  11   3    69873.81    70663.39   2599.91 o
 -16  11   3     1454.90     1164.10     96.02 o
 -13  11   3     9351.04     9243.78    249.07 o
 -10  11   3      230.74      538.58     69.49 o
  -7  11   3     9553.84     9209.71    243.71 o
  -4  11   3      422.18      690.43     66.35 o
  -1  11   3     8477.53     6539.63    222.78 o
   2  11   3      132.86        5.11     36.48 o
   5  11   3    16376.04    13909.14    378.36 o
   8  11   3     3397.88     3654.25    174.23 o
  11  11   3     4883.06     5896.43    223.75 o
 -21  12   3    55917.84    50314.06   1716.06 o
 -18  12   3    59084.91    60673.43   2078.36 o
 -15  12   3      217.84      125.39     50.99 o
 -12  12   3     6341.26     8532.24    283.33 o
  -9  12   3    25044.81    25477.69    792.66 o
  -6  12   3    25733.81    18208.92    552.18 o
  -3  12   3    10473.07    11813.32    297.24 o
   0  12   3     2438.60     2739.13    128.44 o
   3  12   3     4561.19     4458.47    161.50 o
   6  12   3     1101.51      800.21     97.32 o
   9  12   3     3358.61     2973.65    172.81 o
  12  12   3     2113.27     1991.44    201.82 o
 -23  13   3     4688.49     5411.93    254.03 o
 -20  13   3    54438.11    58659.70   1374.82 o
 -17  13   3      524.68      430.14     74.08 o
 -14  13   3      314.33      327.61     64.15 o
 -11  13   3     4705.34     3646.10    136.70 o
  -8  13   3    33486.09    33409.74   1055.33 o
  -5  13   3     1533.20      893.72     76.60 o
  -2  13   3     3008.78     2231.22    124.71 o
   1  13   3     5393.84     7372.13    314.45 o
   4  13   3      193.40      450.89     74.46 o
   7  13   3     6084.73     7251.16    262.63 o
  10  13   3     4020.63     4419.04    237.28 o
  13  13   3      779.99     1109.64    169.35 o
 -25  14   3       60.17      143.45     91.34 o
 -22  14   3    10040.34    10083.00    412.20 o
 -19  14   3    19739.55    21792.19    672.89 o
 -16  14   3    20985.89    21257.14    718.48 o
 -13  14   3      532.98      663.53     82.10 o
 -10  14   3      583.88      347.30     65.07 o
  -7  14   3      467.73      445.99     66.98 o
  -4  14   3     8369.74     8383.05    215.25 o
  -1  14   3       53.42       56.67     47.91 o
   2  14   3    22649.78    28168.52    756.61 o
   5  14   3    33445.53    34207.75    980.42 o
   8  14   3    13232.60    15146.16    449.84 o
  11  14   3      541.82      218.43    101.41 o
  14  14   3     1176.93     1274.40    184.15 o
 -27  15   3     1329.10     1454.86    186.79 o
 -24  15   3      138.60      281.36     94.93 o
 -21  15   3    11644.84    11675.95    338.91 o
 -18  15   3    17159.90    15421.96    615.27 o
 -15  15   3     1574.79     1970.21    123.50 o
 -12  15   3    15136.71    19105.60    552.71 o
  -9  15   3     8414.04     7600.01    277.93 o
  -6  15   3     7521.28    11972.30    299.18 o
  -3  15   3     3105.71     2879.75    149.00 o
   0  15   3     7026.17     7027.20    271.04 o
   3  15   3     2313.58     2486.22    176.22 o
   6  15   3      155.08      152.67     80.16 o
   9  15   3     3024.80     3649.98    229.79 o
  12  15   3        0.58      -33.72     78.57 o
  15  15   3      484.49      322.32    117.02 o
 -29  16   3     1515.76     1911.71    221.48 o
 -26  16   3      849.18      665.62    138.58 o
 -23  16   3     2414.10     3033.59    211.30 o
 -20  16   3     7327.47     8030.29    376.96 o
 -17  16   3    16473.68    18644.99    602.77 o
 -14  16   3    12348.75    13340.01    499.25 o
 -11  16   3      855.10      929.30     93.79 o
  -8  16   3      435.54      436.17     70.70 o
  -5  16   3       25.56       23.48     48.40 o
  -2  16   3    38102.89    34368.91   1104.97 o
   1  16   3       77.15      399.38     90.31 o
   4  16   3    14639.77    14263.93    578.39 o
   7  16   3       69.95       -7.35     65.09 o
  10  16   3    13100.29    12664.47    597.99 o
  13  16   3     1671.60     1655.41    208.53 o
  16  16   3     2081.23     2398.21    247.13 o
 -31  17   3      465.37      526.39    138.74 o
 -28  17   3    10711.88    10092.63    593.77 o
 -25  17   3     2599.48     2063.48    190.26 o
 -22  17   3     8547.29     6992.92    297.69 o
 -19  17   3    18948.66    19466.50    624.56 o
 -16  17   3     8569.84     8001.66    311.06 o
 -13  17   3     4467.44     4686.83    172.71 o
 -10  17   3    15347.49    16168.14    471.42 o
  -7  17   3    37433.96    44215.14   1439.55 o
  -4  17   3     9720.29    11909.36    480.20 o
  -1  17   3    29043.07    23832.38    692.04 o
   2  17   3    58799.77    60278.90   1611.69 o
   5  17   3     1492.75     1231.28    148.81 o
   8  17   3    37844.85    37043.42   1167.94 o
  11  17   3     3860.15     4506.75    298.28 o
  14  17   3     2046.49     2115.04    232.51 o
  17  17   3     3393.01     3569.03    296.52 o
 -33  18   3     3490.67     3592.20    295.16 o
 -30  18   3     3147.07     3432.45    277.27 o
 -27  18   3      131.85      238.03    106.23 o
 -24  18   3       35.61       38.46     71.92 o
 -21  18   3      135.10      170.26     73.43 o
 -18  18   3    17341.23    18152.88    518.98 o
 -15  18   3     5936.26     5889.18    201.14 o
 -12  18   3     4921.84     5830.68    187.54 o
  -9  18   3    17712.23    20177.18    583.76 o
  -6  18   3    34730.83    37862.80   1267.57 o
  -3  18   3    17884.17    17351.11    563.14 o
   0  18   3    35964.29    33244.79   1074.96 o
   3  18   3    42002.63    39781.52   1060.36 o
   6  18   3      257.34      101.17     82.60 o
   9  18   3    16522.30    16052.57    676.28 o
  12  18   3      275.22      289.48    118.47 o
  15  18   3      367.81      223.33    113.03 o
  18  18   3      683.92      981.64    183.96 o
 -35  19   3     2991.95     3298.88    322.20 o
 -32  19   3     2328.70     2656.62    257.25 o
 -29  19   3     2355.10     2151.86    228.65 o
 -26  19   3     1844.93     1366.25    163.91 o
 -23  19   3     3995.24     3179.99    303.58 o
 -20  19   3     6595.54     6090.67    235.45 o
 -17  19   3    34087.75    34150.91    774.50 o
 -14  19   3    10805.35    11517.33    457.59 o
 -11  19   3     3681.59     3860.55    163.17 o
  -8  19   3    95822.88   102264.26   3786.72 o
  -5  19   3       19.55      -19.20     52.76 o
  -2  19   3    19919.42    18787.06    483.24 o
   1  19   3    28088.17    26172.10    719.32 o
   4  19   3     3310.54     4089.39    244.65 o
   7  19   3     7721.51     8379.07    324.27 o
  10  19   3     2851.62     2642.26    253.65 o
  13  19   3      400.97      324.70    123.56 o
  16  19   3      194.82      189.22    110.88 o
  19  19   3       96.75       61.83    128.74 o
 -37  20   3      215.96      185.77    116.07 o
 -34  20   3     3615.69     3490.08    377.11 o
 -31  20   3       87.14      134.05    104.21 o
 -28  20   3     1786.27     1272.02    187.57 o
 -25  20   3     5008.13     4491.90    262.26 o
 -22  20   3      193.80       59.86     65.28 o
 -19  20   3     5052.47     4677.07    221.35 o
 -16  20   3    36980.28    40494.50   1100.44 o
 -13  20   3     9012.39     8443.22    320.73 o
 -10  20   3    14530.38    13235.08    556.97 o
  -7  20   3    34498.83    37674.47   1507.45 o
  -4  20   3    10535.48    12062.84    402.46 o
  -1  20   3     6622.00     6294.23    310.37 o
   2  20   3       44.67      334.92    111.13 o
   5  20   3      322.76      364.04    105.70 o
   8  20   3     1910.64     1571.45    202.35 o
  11  20   3      127.29       27.19     91.45 o
  14  20   3     4232.46     4285.74    322.80 o
  17  20   3     1218.50     1768.87    259.78 o
 -39  21   3       51.68       71.16    129.23 o
 -36  21   3      502.07      257.90    134.57 o
 -33  21   3     2195.77     2264.52    271.30 o
 -30  21   3      187.07      112.87    105.70 o
 -27  21   3      462.38      959.49    153.27 o
 -24  21   3    19967.92    20133.89    705.49 o
 -21  21   3     2998.29     2863.89    194.45 o
 -18  21   3    29322.74    28200.45   1055.54 o
 -15  21   3    10798.95    10260.17    266.17 o
 -12  21   3     2624.24     3503.81    191.75 o
  -9  21   3    40372.65    42841.30   1498.28 o
  -6  21   3     2078.39     2594.58    173.39 o
  -3  21   3     1011.16     1296.65    152.18 o
   0  21   3    31203.82    33090.39    803.20 o
   3  21   3      576.08      431.78    110.57 o
   6  21   3      353.06       97.14     84.82 o
   9  21   3      357.57      482.42    134.93 o
  12  21   3     2275.75     2719.15    268.14 o
  15  21   3     6039.42     6141.49    415.93 o
  18  21   3       34.73       64.70    127.03 o
 -38  22   3     1059.48      752.89    189.27 o
 -35  22   3     1590.69     1421.86    229.70 o
 -32  22   3     1151.04     1146.99    201.13 o
 -29  22   3     1788.86     1933.19    221.48 o
 -26  22   3     1286.74     1452.41    195.13 o
 -23  22   3      944.16      909.20    139.71 o
 -20  22   3     1734.22     1466.99    151.33 o
 -17  22   3     1693.13     2034.90    164.70 o
 -14  22   3     6890.71     5197.58    218.76 o
 -11  22   3      212.61      211.22     77.44 o
  -8  22   3     3114.56     3018.27    196.89 o
  -5  22   3      849.44      468.64    106.56 o
  -2  22   3    11663.57    13037.77    380.99 o
   1  22   3    22541.41    19943.42    636.86 o
   4  22   3     1761.75     1304.97    169.89 o
   7  22   3        6.51       24.08     84.14 o
  10  22   3      135.08      111.51     97.75 o
  13  22   3     8292.32     8425.91    447.49 o
  16  22   3     3591.48     3596.31    344.48 o
 -37  23   3      101.44       83.41    114.76 o
 -34  23   3      975.78      937.43    192.46 o
 -31  23   3     3105.95     2933.88    296.66 o
 -28  23   3      976.92     1010.38    173.98 o
 -25  23   3     6863.95     7633.66    343.06 o
 -22  23   3     1230.52      855.24    128.08 o
 -19  23   3     3899.08     3045.79    202.20 o
 -16  23   3     6082.92     6887.18    274.21 o
 -13  23   3     6798.65     6467.89    243.95 o
 -10  23   3      499.71      540.50    103.46 o
  -7  23   3       22.19       26.08     64.96 o
  -4  23   3     7232.38     6451.00    294.66 o
  -1  23   3    76992.98    75897.70   3478.05 o
   2  23   3      402.26      240.14    100.18 o
   5  23   3      535.40      483.46    130.62 o
   8  23   3     3113.18     3726.72    322.59 o
  11  23   3     2903.64     3199.34    393.19 o
  14  23   3     5942.23     6723.80    439.12 o
 -39  24   3      668.33      643.35    179.72 o
 -36  24   3      104.71       95.64    109.25 o
 -33  24   3      315.00      217.76    128.50 o
 -30  24   3      888.44      623.01    148.92 o
 -27  24   3      397.48      376.55    125.33 o
 -24  24   3     3705.54     4066.60    281.28 o
 -21  24   3        2.14       41.76     74.64 o
 -18  24   3    53274.23    51440.37   1487.71 o
 -15  24   3    13634.54    12642.46    468.25 o
 -12  24   3      693.87      419.86     97.19 o
  -9  24   3      207.88      175.78     79.73 o
  -6  24   3     2318.47     2442.76    201.34 o
  -3  24   3    37783.35    37298.15   1480.32 o
   0  24   3     9903.57     9083.57    343.23 o
   3  24   3     1739.15     1950.69    201.23 o
   6  24   3     2841.90     3302.10    304.75 o
   9  24   3       97.51      177.84    118.64 o
  12  24   3     1178.48     1140.39    219.14 o
  15  24   3     1366.10     1210.41    259.44 o
 -38  25   3      249.69      213.26    137.79 o
 -35  25   3      348.43      382.66    155.79 o
 -32  25   3     1934.51     1629.13    269.86 o
 -29  25   3        2.85       -4.52     87.99 o
 -26  25   3      416.23      596.88    142.20 o
 -23  25   3     2233.17     2291.62    217.80 o
 -20  25   3    11945.40    10660.29    390.29 o
 -17  25   3    36209.24    32005.54   1159.60 o
 -14  25   3     1011.80      675.75    127.77 o
 -11  25   3      153.07      461.35    101.53 o
  -8  25   3      638.06      949.40    137.13 o
  -5  25   3     6845.29     6920.83    365.90 o
  -2  25   3    42677.46    44865.75   1620.60 o
   1  25   3      877.26      958.69    166.42 o
   4  25   3      205.55      326.99    131.69 o
   7  25   3       23.64      103.20    105.53 o
  10  25   3      311.27      398.97    147.98 o
  13  25   3     1831.04     1814.86    270.44 o
 -37  26   3      110.86       70.88    117.57 o
 -34  26   3     3019.93     2790.59    304.29 o
 -31  26   3     2700.20     2370.62    255.44 o
 -28  26   3      511.70      649.96    150.22 o
 -25  26   3     1749.83     2276.23    238.10 o
 -22  26   3     2143.98     3050.38    253.96 o
 -19  26   3    51294.59    54555.19   2593.17 o
 -16  26   3     5809.51     4856.33    293.89 o
 -13  26   3      594.14      902.57    154.25 o
 -10  26   3     4530.82     4092.74    279.20 o
  -7  26   3      124.23      124.14     84.70 o
  -4  26   3    17582.86    18362.22    828.39 o
  -1  26   3     2920.48     2798.42    254.04 o
   2  26   3      738.92      890.82    168.38 o
   5  26   3     3147.07     3511.47    319.34 o
   8  26   3      101.70       39.36     98.11 o
  11  26   3      161.11      245.62    135.51 o
 -36  27   3     2262.65     2246.50    288.69 o
 -33  27   3    13232.13    13761.60    865.88 o
 -30  27   3      914.09      990.81    179.54 o
 -27  27   3     2619.46     2636.10    257.89 o
 -24  27   3     1001.30     1093.58    193.44 o
 -21  27   3     1826.54     2362.71    236.37 o
 -18  27   3    30006.62    29111.23   1234.99 o
 -15  27   3     2688.29     1935.65    211.62 o
 -12  27   3     1057.77      822.99    150.90 o
  -9  27   3      787.49      575.10    133.63 o
  -6  27   3      835.61      780.25    150.73 o
  -3  27   3     7194.76     7532.80    354.19 o
   0  27   3       17.01      -73.15     84.25 o
   3  27   3     1173.08      749.53    177.79 o
   6  27   3       60.14       11.39     96.84 o
   9  27   3      106.30      133.77    120.30 o
 -35  28   3     5133.45     4430.43    374.54 o
 -32  28   3     8228.33     9091.55    546.69 o
 -29  28   3      100.80       22.62     93.40 o
 -26  28   3      332.81      626.23    163.35 o
 -23  28   3     1684.18     1263.82    186.44 o
 -20  28   3    15478.13    17373.61    602.46 o
 -17  28   3      205.73      211.55    105.74 o
 -14  28   3     4282.37     4087.33    350.63 o
 -11  28   3     1573.51     1716.34    258.96 o
  -8  28   3      274.72      359.17    129.80 o
  -5  28   3     3193.64     3300.78    298.16 o
  -2  28   3        9.74       40.78     90.33 o
   1  28   3       75.51      -21.60     78.29 o
   4  28   3      512.60      400.82    144.79 o
   7  28   3      459.78      538.82    163.87 o
 -37  29   3     1615.91     1421.84    244.10 o
 -34  29   3     4213.82     4528.57    377.32 o
 -31  29   3       58.52      -77.33     88.62 o
 -28  29   3      236.85      191.58    117.60 o
 -25  29   3      994.33      936.00    185.40 o
 -22  29   3     2222.71     1903.02    217.67 o
 -19  29   3     2298.94     1930.44    220.10 o
 -16  29   3       21.13      110.32    108.01 o
 -13  29   3     1343.37     1213.85    225.27 o
 -10  29   3     2659.23     2837.90    333.43 o
  -7  29   3        8.08        9.79     90.22 o
  -4  29   3      341.28      376.03    138.43 o
  -1  29   3      983.56      705.63    192.19 o
   2  29   3      185.75      140.97    131.62 o
   5  29   3       71.95       59.09    105.89 o
   8  29   3      312.88      199.50    135.65 o
 -36  30   3     1935.05     1981.18    284.30 o
 -33  30   3      238.11      111.09    136.46 o
 -30  30   3      200.47      279.12    130.79 o
 -27  30   3     3055.07     3126.98    311.43 o
 -24  30   3     2522.93     2525.83    249.84 o
 -21  30   3      713.82      417.00    143.32 o
 -18  30   3     1751.07     1500.68    221.44 o
 -15  30   3     1727.55     2131.71    279.81 o
 -12  30   3     2478.55     2485.24    301.08 o
  -9  30   3        2.87       33.97    102.75 o
  -6  30   3       28.53       81.89    101.97 o
  -3  30   3      153.35        5.57     95.16 o
   0  30   3      899.41      670.44    167.51 o
   3  30   3      176.73      117.16    123.73 o
   6  30   3     1080.91      733.63    211.21 o
 -35  31   3      358.02      267.46    158.41 o
 -32  31   3      408.88      374.42    152.14 o
 -29  31   3       17.56        7.56    106.84 o
 -26  31   3     3314.67     3488.78    361.01 o
 -23  31   3       78.87       -5.90     92.74 o
 -20  31   3      183.20      126.93    113.36 o
 -17  31   3     3903.91     4160.91    369.82 o
 -14  31   3       35.59      134.25    115.10 o
 -11  31   3      885.65      830.67    201.15 o
  -8  31   3     1044.88      946.15    187.16 o
  -5  31   3     1142.70      965.94    193.88 o
  -2  31   3      515.94      569.02    162.19 o
   1  31   3     1264.89     1314.51    253.14 o
   4  31   3     1078.29     1222.14    244.14 o
 -34  32   3      392.49      550.01    220.13 o
 -31  32   3      241.32      359.70    157.79 o
 -28  32   3     1087.93     1087.17    233.12 o
 -25  32   3      681.86      471.92    172.07 o
 -22  32   3       14.46      -30.32     89.47 o
 -19  32   3      109.58      120.97    103.35 o
 -16  32   3     1249.13     1267.15    236.81 o
 -13  32   3      748.61     1022.11    216.67 o
 -10  32   3     2843.57     2688.42    320.99 o
  -7  32   3     2322.38     2300.53    277.99 o
  -4  32   3     4288.28     3828.37    339.66 o
  -1  32   3      896.10     1160.46    214.06 o
   2  32   3     2042.89     1759.06    333.92 o
 -33  33   3     2311.69     2324.08    324.89 o
 -30  33   3      374.90      323.39    155.16 o
 -27  33   3        8.36       62.67    122.72 o
 -24  33   3      653.35      880.88    186.72 o
 -21  33   3     1434.35     1993.30    255.22 o
 -18  33   3      416.02      408.17    152.75 o
 -15  33   3     4591.61     4237.87    383.61 o
 -12  33   3     2619.12     2493.26    314.46 o
  -9  33   3      276.71      181.90    135.99 o
  -6  33   3     8561.16     8424.96    730.82 o
  -3  33   3      276.57       12.74    106.39 o
   0  33   3     1474.91     1475.29    267.61 o
 -32  34   3     2417.43     2590.58    344.36 o
 -29  34   3      204.16      522.09    183.41 o
 -26  34   3      182.46      188.21    138.09 o
 -23  34   3     1360.32     1191.93    210.32 o
 -20  34   3     2510.67     1740.38    275.17 o
 -17  34   3     7151.57     6483.22    675.26 o
 -14  34   3     3006.42     2405.24    310.59 o
 -11  34   3     2823.19     3010.04    399.08 o
  -8  34   3     3196.03     3774.71    381.28 o
  -5  34   3     4138.70     3965.91    453.03 o
  -2  34   3      608.86      920.98    227.01 o
 -31  35   3     2007.35     1957.81    304.56 o
 -28  35   3      328.67      663.42    202.30 o
 -25  35   3       38.44      -77.40    103.98 o
 -22  35   3     6454.21     6108.19    562.37 o
 -19  35   3       37.53      144.89    128.73 o
 -16  35   3     3987.52     3130.05    349.16 o
 -13  35   3     4903.24     4459.99    465.65 o
 -10  35   3       88.63      -19.61    110.47 o
  -7  35   3     3405.11     3079.86    361.05 o
  -4  35   3      283.00      210.70    146.70 o
 -30  36   3     1713.08     1914.74    306.48 o
 -27  36   3      583.86      833.59    211.58 o
 -24  36   3     2225.63     2189.78    310.19 o
 -21  36   3     2505.99     2313.06    320.22 o
 -18  36   3     2537.26     2886.69    417.45 o
 -15  36   3     1160.19     1274.74    253.16 o
 -12  36   3      489.67      348.19    159.23 o
  -9  36   3      217.51      243.11    149.57 o
  -6  36   3      474.31      429.59    201.21 o
 -29  37   3      299.14      290.54    154.88 o
 -26  37   3      289.21       50.15    138.28 o
 -23  37   3     3298.49     4135.68    404.15 o
 -20  37   3      255.18      175.48    141.67 o
 -17  37   3      641.64      574.00    181.50 o
 -14  37   3       78.14       58.10    124.52 o
 -11  37   3      358.36      108.00    128.54 o
  -8  37   3        6.37       27.10    125.08 o
 -25  38   3        7.64       -5.89    121.99 o
 -22  38   3      305.77      229.42    173.58 o
 -19  38   3      646.73      825.69    214.95 o
 -16  38   3      570.26      349.24    159.86 o
 -13  38   3      552.31      449.30    173.13 o
 -24  39   3        0.31       33.82    137.25 o
 -21  39   3       47.45      111.80    124.78 o
 -18  39   3      372.88      305.73    154.50 o
 -15  39   3     5445.16     5456.37    532.27 o
  -1   1   4    76636.02   106060.85   2329.79 o
  -3   2   4    97618.48    99188.17   1398.07 o
   0   2   4    17073.59    20338.99    429.99 o
  -5   3   4    79476.32    83378.12   2110.63 o
  -2   3   4    92962.20    80347.76   2079.68 o
   1   3   4    25208.42    34951.23    784.29 o
  -7   4   4     6002.79     4518.89    180.26 o
  -4   4   4   131376.28   138226.05   4311.13 o
   2   4   4    19113.79    33803.03    727.32 o
  -9   5   4   112497.54   105347.07   2743.42 o
  -6   5   4   171521.28   144802.33   2524.31 o
  -3   5   4    76380.23    77527.22   2769.50 o
   3   5   4     8146.87     5932.05    148.54 o
  -8   6   4    72066.31    64799.46   1647.44 o
  -5   6   4   150776.53   155253.75   6318.24 o
  -2   6   4     6703.21     4870.58    194.28 o
   1   6   4       40.60      268.99     38.45 o
   4   6   4   347770.06   286551.06   9939.39 o
 -13   7   4   127180.39   125678.53   4431.88 o
  -7   7   4     8215.48     6521.30    230.28 o
  -4   7   4    35579.82    29098.27    906.81 o
  -1   7   4     6247.67     5908.97    205.09 o
   2   7   4      209.74      470.24     62.58 o
   5   7   4   107950.98   107523.07   3418.26 o
 -15   8   4      205.11       92.83     52.09 o
  -9   8   4   176947.28   175404.33   4575.18 o
  -6   8   4    47957.90    42870.01   1343.36 o
  -3   8   4   148701.64   133851.70   6150.04 o
   0   8   4      698.75     1097.25     68.90 o
   3   8   4     5403.33     5524.85    162.06 o
   6   8   4    53090.11    51949.96   2037.23 o
 -17   9   4      144.65      110.22     46.04 o
 -14   9   4     4405.74     3924.88    137.17 o
 -11   9   4   150504.11   162669.52   7879.51 o
  -8   9   4    20242.39    17800.02    567.99 o
  -5   9   4   194333.72   183213.48   9757.63 o
  -2   9   4    56767.35    56276.81   1630.17 o
   1   9   4     3478.58     4812.35    198.40 o
   4   9   4     1252.88     2314.11    125.82 o
   7   9   4    13675.58    13689.52    319.08 o
 -19  10   4    15462.66    18016.97    357.94 o
 -16  10   4     7204.03     5364.18    184.93 o
 -13  10   4     1013.00     1220.33     94.40 o
 -10  10   4     5485.66     3017.47    124.78 o
  -7  10   4      817.24     1125.83     81.50 o
  -4  10   4    11052.75     8744.95    290.77 o
  -1  10   4     8568.25     6157.79    145.75 o
   2  10   4    14484.16    11980.14    358.31 o
   5  10   4    20601.40    21262.12    559.39 o
   8  10   4     9342.66     7426.48    252.55 o
 -21  11   4    10471.59    11386.56    527.28 o
 -18  11   4    18802.31    16750.55    550.99 o
 -15  11   4     5225.12     4865.07    159.61 o
 -12  11   4       56.07       30.76     45.24 o
  -9  11   4    28824.91    29910.10   1010.64 o
  -6  11   4    18815.92    20684.20    600.93 o
  -3  11   4      717.91     1949.59    103.63 o
   0  11   4    11948.67    13771.42    328.15 o
   3  11   4     2306.34     3702.69    145.22 o
   6  11   4     1448.21     2113.57    135.74 o
   9  11   4       94.13      477.76     91.90 o
 -23  12   4      311.71       74.45     81.05 o
 -20  12   4    31774.52    33969.12   1231.62 o
 -17  12   4     1186.21     1322.41    107.43 o
 -14  12   4      749.73      933.98     90.21 o
 -11  12   4      185.58      127.96     50.14 o
  -8  12   4     1380.86     1740.42    104.36 o
  -5  12   4    10375.01    10767.04    408.39 o
  -2  12   4     1096.97     2752.52    121.35 o
   1  12   4     2615.54     3384.28    150.03 o
   4  12   4     3334.61     3359.16    154.18 o
   7  12   4    31798.88    32569.48    903.26 o
  10  12   4       68.27      274.33     91.46 o
 -25  13   4     4963.70     5662.98    298.52 o
 -22  13   4    15142.60    14706.36    429.64 o
 -19  13   4    14014.77    13021.54    323.20 o
 -16  13   4     2691.10     2474.89    131.89 o
 -13  13   4     6693.49     7529.55    285.93 o
 -10  13   4    25532.85    27346.19    997.96 o
  -7  13   4    11636.82    12861.85    412.95 o
  -4  13   4     9536.50    12691.78    439.11 o
  -1  13   4     6569.56     6976.80    260.60 o
   2  13   4       20.08       92.52     58.54 o
   5  13   4     4977.39     3662.78    197.42 o
   8  13   4      201.38      187.92     78.01 o
  11  13   4      274.88      422.18    117.89 o
 -27  14   4     1082.66     1204.42    175.81 o
 -24  14   4     1048.52      886.63    135.82 o
 -21  14   4     9337.14     9616.00    345.04 o
 -18  14   4     7599.18     8461.37    279.74 o
 -15  14   4     5891.96     5922.90    245.57 o
 -12  14   4      696.42     1854.06    116.58 o
  -9  14   4     3280.97     3354.91    136.82 o
  -6  14   4    19978.60    24594.96    624.29 o
  -3  14   4    35754.65    41661.98   1645.36 o
   0  14   4     1358.67     1520.20    117.93 o
   3  14   4     2105.01     1562.90    145.42 o
   6  14   4     6611.21     6995.82    262.35 o
   9  14   4     6825.06     8655.39    306.78 o
  12  14   4       35.82      -10.75     75.53 o
 -29  15   4      156.50      100.38     96.23 o
 -26  15   4      422.03      383.79    115.51 o
 -23  15   4      919.75      929.61    137.70 o
 -20  15   4      143.02      206.92     77.68 o
 -17  15   4    23509.23    21700.78    694.22 o
 -14  15   4     4025.42     2838.51    153.06 o
 -11  15   4       30.00       33.05     46.49 o
  -8  15   4     6510.63     8329.44    299.53 o
  -5  15   4        7.22       47.81     42.91 o
  -2  15   4    23468.04    26054.87    814.47 o
   1  15   4     9738.37    10132.45    384.96 o
   4  15   4    14137.91    15709.31    382.01 o
   7  15   4     1324.71     1501.63    161.53 o
  10  15   4     8697.63     9037.11    358.54 o
  13  15   4      243.22      110.90     95.99 o
 -31  16   4     1347.32     1122.09    181.22 o
 -28  16   4     4136.17     3547.88    274.17 o
 -25  16   4      659.09      435.79    110.38 o
 -22  16   4        4.68        9.87     65.20 o
 -19  16   4    17011.50    16979.08    472.84 o
 -16  16   4     3995.25     5192.16    224.30 o
 -13  16   4     8643.10    11067.40    407.36 o
 -10  16   4    10775.32    13697.79    402.04 o
  -7  16   4     3228.96     3554.26    141.51 o
  -4  16   4    29486.49    32126.42   1071.80 o
  -1  16   4     7203.13     7183.19    215.56 o
   2  16   4     9806.86    10219.05    337.82 o
   5  16   4      365.90      855.69    128.66 o
   8  16   4    19286.83    19926.49    716.29 o
  11  16   4     6389.10     5856.77    321.51 o
  14  16   4      546.17      226.70    113.17 o
 -33  17   4     2905.25     3223.02    281.21 o
 -30  17   4      563.32      420.23    128.69 o
 -27  17   4     1931.35     2144.78    223.40 o
 -24  17   4     1161.40     1685.10    177.63 o
 -21  17   4      680.88      825.43    128.90 o
 -18  17   4     9355.50     9282.36    402.97 o
 -15  17   4      870.79      839.10     96.10 o
 -12  17   4     2219.66     1801.11    123.57 o
  -9  17   4      281.67      200.40     59.05 o
  -6  17   4    15379.70    14865.25    504.30 o
  -3  17   4    21427.49    23032.88    725.41 o
   0  17   4     8445.92     7170.01    282.49 o
   3  17   4    22392.70    22431.73    663.91 o
   6  17   4      831.88      681.52    125.15 o
   9  17   4    42363.55    40655.61   1105.64 o
  12  17   4     3274.09     3100.77    263.10 o
  15  17   4      217.12      124.58    103.65 o
 -35  18   4     1348.72     1431.79    210.47 o
 -32  18   4     4798.30     4517.72    318.01 o
 -29  18   4     6274.20     6090.44    382.19 o
 -26  18   4      129.22       89.96     80.25 o
 -23  18   4      804.72      539.10    115.89 o
 -20  18   4       18.46      156.88     72.89 o
 -17  18   4     8883.19     8368.10    383.96 o
 -14  18   4    13306.41    12942.08    475.05 o
 -11  18   4     9106.22     9787.35    259.29 o
  -8  18   4    45732.03    47346.65   1396.75 o
  -5  18   4    12412.70    12013.56    427.25 o
  -2  18   4     4029.19     4063.86    212.01 o
   1  18   4    30420.58    34755.65   1349.18 o
   4  18   4     3664.16     2841.85    208.37 o
   7  18   4    16658.60    17282.17    579.42 o
  10  18   4    30951.33    30933.67    922.05 o
  13  18   4       55.47      -13.12     84.57 o
  16  18   4       25.48      -29.96     88.51 o
 -37  19   4      151.63       88.43    128.78 o
 -34  19   4     3133.33     2930.13    277.16 o
 -31  19   4      583.68      421.43    137.40 o
 -28  19   4      604.66      658.83    141.12 o
 -25  19   4      346.04      161.88     86.73 o
 -22  19   4      184.27      263.27     92.14 o
 -19  19   4       45.22      -23.45     57.09 o
 -16  19   4    27883.24    26623.32   1009.65 o
 -13  19   4    12880.37    14647.48    392.67 o
 -10  19   4     7005.93     7984.19    372.63 o
  -7  19   4   152247.81   157379.06   5373.01 o
  -4  19   4      210.65      243.35     79.67 o
  -1  19   4     7228.92     8094.34    286.99 o
   2  19   4       75.33       23.92     69.42 o
   5  19   4     2862.75     3030.21    224.47 o
   8  19   4    24319.50    28733.23   1336.94 o
  11  19   4    11316.88    11923.18    443.93 o
  14  19   4      665.99      878.00    205.98 o
  17  19   4       24.46       81.50    114.87 o
 -39  20   4        0.15      -91.80     91.80 o
 -36  20   4      119.20      177.46    120.29 o
 -33  20   4     3978.73     3641.18    298.20 o
 -30  20   4        1.46       -1.44     81.53 o
 -27  20   4      317.16      398.30    110.86 o
 -24  20   4     8942.71     7955.73    331.87 o
 -21  20   4       35.95       95.67     75.77 o
 -18  20   4     9935.00     8700.33    275.62 o
 -15  20   4    12723.17    11017.57    457.24 o
 -12  20   4     1770.02     1883.26    135.48 o
  -9  20   4   150066.69   156384.47   4866.12 o
  -6  20   4    31056.24    31653.90    940.40 o
  -3  20   4     5812.32     5657.71    244.32 o
   0  20   4      406.67      216.58     92.87 o
   3  20   4     1510.99     1576.41    175.44 o
   6  20   4     3087.79     3151.01    234.87 o
   9  20   4    13410.41    13466.72    464.90 o
  12  20   4      825.76      546.44    157.74 o
  15  20   4     2648.12     2586.14    295.70 o
  18  20   4       27.83       -6.47    107.83 o
 -38  21   4      327.72      360.35    160.34 o
 -35  21   4     2955.02     3841.67    340.03 o
 -32  21   4      948.13      623.53    162.02 o
 -29  21   4       52.86       21.49     88.45 o
 -26  21   4     9477.43    10350.10    375.11 o
 -23  21   4     4788.92     4489.60    259.58 o
 -20  21   4       78.63       98.14     70.16 o
 -17  21   4    32555.80    34354.11    925.46 o
 -14  21   4       35.85       72.11     59.28 o
 -11  21   4    20052.87    22987.83    768.47 o
  -8  21   4   105013.70   108721.90   5414.42 o
  -5  21   4      438.89      342.14     96.19 o
  -2  21   4       32.50       49.96     72.70 o
   1  21   4     5730.71     7487.85    300.35 o
   4  21   4      120.82       15.28     74.94 o
   7  21   4    12689.35    13430.62    527.50 o
  10  21   4      649.42      516.83    148.23 o
  13  21   4     6020.06     6127.84    411.86 o
  16  21   4     2172.83     2441.71    291.71 o
 -37  22   4      482.25      355.42    145.11 o
 -34  22   4     2142.75     2135.33    269.85 o
 -31  22   4      382.30      352.90    138.45 o
 -28  22   4      405.41      584.19    133.74 o
 -25  22   4    36107.76    33446.60    995.17 o
 -22  22   4     6094.28     6965.53    290.10 o
 -19  22   4     1031.60      851.62    123.78 o
 -16  22   4     1251.65     2000.74    162.49 o
 -13  22   4      455.52      673.35    111.40 o
 -10  22   4    67201.92    70927.48   3121.72 o
  -7  22   4    32342.39    31622.65   1314.05 o
  -4  22   4     1475.67     1589.50    165.42 o
  -1  22   4    28375.59    28592.79    614.70 o
   2  22   4      439.63      564.38    122.06 o
   5  22   4     1415.37     1479.98    194.53 o
   8  22   4      527.67      633.76    160.94 o
  11  22   4     6253.85     6520.79    403.04 o
  14  22   4     3816.21     4476.27    456.33 o
  17  22   4       18.01       23.54    102.68 o
 -36  23   4      120.25       62.08    110.23 o
 -33  23   4     1197.21      957.90    194.67 o
 -30  23   4       71.00       34.13     97.33 o
 -27  23   4     7430.57     8622.80    373.01 o
 -24  23   4    10244.22    10701.55    366.03 o
 -21  23   4      540.86      791.98    124.66 o
 -18  23   4    15072.02    14626.12    369.14 o
 -15  23   4      140.19      576.08    114.80 o
 -12  23   4     2065.97     2486.06    178.55 o
  -9  23   4    30478.90    32369.69   1305.66 o
  -6  23   4      140.22      110.84     79.36 o
  -3  23   4    27830.27    27929.84   1268.54 o
   0  23   4    13337.62    11628.22    562.94 o
   3  23   4      810.77      715.33    150.24 o
   6  23   4     1061.98      874.96    176.82 o
   9  23   4      831.31     1055.03    202.61 o
  12  23   4     1706.75     2510.95    292.48 o
  15  23   4     1221.38     1340.71    231.79 o
 -38  24   4     1131.30     1288.03    229.81 o
 -35  24   4      772.74      826.08    188.05 o
 -32  24   4      230.07      227.29    126.24 o
 -29  24   4     1048.78      968.22    188.50 o
 -26  24   4    11762.38    11165.06    419.11 o
 -23  24   4     6729.38     9627.60    348.77 o
 -20  24   4      166.29      113.69     75.79 o
 -17  24   4    22006.06    21207.61    824.56 o
 -14  24   4     3182.74     3459.28    223.35 o
 -11  24   4    15201.57    16276.44    435.43 o
  -8  24   4     4947.97     4948.33    258.42 o
  -5  24   4      416.34      887.71    141.96 o
  -2  24   4    30604.11    30438.83   1579.14 o
   1  24   4      603.05      417.55    124.66 o
   4  24   4      367.86      260.47    112.01 o
   7  24   4       28.77      -50.18     86.52 o
  10  24   4       40.51      177.38    123.19 o
  13  24   4      594.43      602.75    178.43 o
 -37  25   4       65.79      137.37    124.94 o
 -34  25   4       38.29       -5.49    102.69 o
 -31  25   4     2689.01     2584.53    317.52 o
 -28  25   4     8785.79     9224.29    526.92 o
 -25  25   4    19481.49    19063.60    541.25 o
 -22  25   4      116.86       53.96     79.99 o
 -19  25   4    15852.15    17103.32    605.25 o
 -16  25   4     1498.57     2424.92    201.21 o
 -13  25   4      583.00      491.87    105.89 o
 -10  25   4     3745.91     3576.19    232.87 o
  -7  25   4      490.50      495.23    121.87 o
  -4  25   4     9570.16    12103.58    730.01 o
  -1  25   4     1642.84     1448.34    195.44 o
   2  25   4      166.35       49.77     87.67 o
   5  25   4      515.26      403.24    140.49 o
   8  25   4      338.77      120.48    114.91 o
  11  25   4       88.81       97.18    116.88 o
 -36  26   4      227.17      248.84    135.35 o
 -33  26   4     2891.86     2427.54    290.49 o
 -30  26   4     2457.22     2671.56    262.35 o
 -27  26   4     2061.58     2047.21    233.52 o
 -24  26   4      854.70      634.04    159.90 o
 -21  26   4      217.04       68.58     89.64 o
 -18  26   4    36483.96    37746.40   1807.13 o
 -15  26   4      147.35       29.25     77.38 o
 -12  26   4     2634.88     3254.06    307.63 o
  -9  26   4     1550.69     1231.02    172.29 o
  -6  26   4       19.51       23.24     79.84 o
  -3  26   4     2380.87     2017.50    220.30 o
   0  26   4      703.51      403.72    126.09 o
   3  26   4     1195.53      991.39    175.74 o
   6  26   4     1178.78      977.51    199.12 o
   9  26   4       29.70      104.31    111.01 o
  12  26   4      129.62      162.90    132.52 o
 -38  27   4        8.80       57.53    146.21 o
 -35  27   4      893.46      963.45    207.94 o
 -32  27   4     7753.62     8292.03    440.95 o
 -29  27   4     1216.31     1506.55    208.30 o
 -26  27   4     2670.12     2845.38    287.17 o
 -23  27   4      991.33      973.36    182.63 o
 -20  27   4     2255.18     2175.08    221.02 o
 -17  27   4      364.06      467.65    161.69 o
 -14  27   4       14.69       10.16     87.67 o
 -11  27   4      377.18      257.16    105.08 o
  -8  27   4      227.30      236.11    102.96 o
  -5  27   4       14.45       40.64     85.37 o
  -2  27   4      464.94      269.58    128.75 o
   1  27   4       10.64       -4.94     80.77 o
   4  27   4     4611.36     4439.99    391.27 o
   7  27   4      206.63      203.18    125.03 o
  10  27   4      809.06      737.07    191.40 o
 -37  28   4       45.61      -25.89    106.94 o
 -34  28   4     2357.08     2348.93    293.83 o
 -31  28   4     2099.86     1899.54    235.78 o
 -28  28   4       61.03      195.03    118.42 o
 -25  28   4      882.23      841.11    180.19 o
 -22  28   4        3.86      -77.63     79.55 o
 -19  28   4     4264.81     4872.62    534.62 o
 -16  28   4      277.23      258.91    120.13 o
 -13  28   4      342.53      548.23    165.96 o
 -10  28   4     3200.69     3877.13    309.45 o
  -7  28   4       16.96       -7.91     78.98 o
  -4  28   4       16.79       60.78     89.18 o
  -1  28   4      369.77      278.59    114.97 o
   2  28   4     1058.20     1474.69    210.08 o
   5  28   4       98.44       58.79    105.31 o
   8  28   4     1852.60     2189.20    281.99 o
 -36  29   4      576.53      543.91    174.22 o
 -33  29   4      636.64      317.20    145.99 o
 -30  29   4      219.03      205.71    136.97 o
 -27  29   4     1921.31     2344.37    303.50 o
 -24  29   4      132.06      207.21    131.69 o
 -21  29   4       73.98       53.12     96.13 o
 -18  29   4       44.43        4.95     89.06 o
 -15  29   4      148.71      253.39    135.35 o
 -12  29   4     7920.44     7466.10    715.49 o
  -9  29   4      929.98      867.83    177.12 o
  -6  29   4       77.32      183.83    115.27 o
  -3  29   4      822.91      751.96    157.67 o
   0  29   4      508.08      495.65    142.82 o
   3  29   4       77.22       47.69    100.97 o
   6  29   4      832.65      985.84    207.68 o
 -35  30   4      142.09      -36.66    133.92 o
 -32  30   4      503.21      485.47    187.31 o
 -29  30   4      453.63      480.39    168.85 o
 -26  30   4     4917.40     4345.52    386.03 o
 -23  30   4      254.92      341.50    134.17 o
 -20  30   4      278.59      130.53    107.99 o
 -17  30   4     2015.26     2135.76    252.00 o
 -14  30   4      191.29      104.30    113.62 o
 -11  30   4     1042.37      688.70    180.10 o
  -8  30   4      360.91      511.70    151.62 o
  -5  30   4      306.26      279.74    126.91 o
  -2  30   4      839.80     1468.62    234.65 o
   1  30   4        1.65      -22.71    105.75 o
   4  30   4       68.68       54.87    121.86 o
 -34  31   4       69.91      -64.26    129.58 o
 -31  31   4        9.60       11.61    110.79 o
 -28  31   4     2046.83     2101.88    297.65 o
 -25  31   4     2529.74     2424.54    310.42 o
 -22  31   4      412.82      287.17    130.89 o
 -19  31   4     3185.25     3343.50    307.94 o
 -16  31   4     3797.24     3526.63    349.99 o
 -13  31   4      105.21       46.39    109.25 o
 -10  31   4     1092.34     1064.52    216.52 o
  -7  31   4       42.38       80.23    104.70 o
  -4  31   4      773.61      821.59    178.45 o
  -1  31   4     3366.59     4284.71    358.83 o
   2  31   4     1066.04     1200.72    246.52 o
   5  31   4     2709.70     3065.56    369.45 o
 -33  32   4     1170.73     1282.74    263.58 o
 -30  32   4        2.49       93.62    123.12 o
 -27  32   4     2552.68     2203.94    307.82 o
 -24  32   4        8.36       -9.65    102.64 o
 -21  32   4       73.57      -52.20     84.66 o
 -18  32   4      880.75      882.93    200.62 o
 -15  32   4     1094.97      778.14    196.37 o
 -12  32   4      943.25     1320.67    241.11 o
  -9  32   4     2510.52     2255.54    305.23 o
  -6  32   4     5799.31     5950.53    400.55 o
  -3  32   4      330.37      341.81    139.82 o
   0  32   4     1602.04     1403.69    263.77 o
   3  32   4     2748.91     2426.29    334.08 o
 -32  33   4     2041.49     2067.90    316.37 o
 -29  33   4        1.18        9.34    111.88 o
 -26  33   4       89.19       40.76    123.96 o
 -23  33   4       11.70      -12.81     91.88 o
 -20  33   4     1917.84     2432.18    351.82 o
 -17  33   4     1376.14     1406.82    251.02 o
 -14  33   4     2136.62     2005.28    283.64 o
 -11  33   4     3163.79     3164.46    398.73 o
  -8  33   4      970.54     1070.03    226.32 o
  -5  33   4     6777.72     8198.96    635.51 o
  -2  33   4        1.35      -60.27     88.97 o
   1  33   4     2311.39     2249.53    318.98 o
 -31  34   4     1911.25     2253.92    320.98 o
 -28  34   4      467.22      359.90    162.61 o
 -25  34   4      745.42      566.54    185.93 o
 -22  34   4     3227.40     3286.93    354.91 o
 -19  34   4      733.18      603.87    183.54 o
 -16  34   4     7364.74     7630.97    707.08 o
 -13  34   4     4989.64     5145.11    732.41 o
 -10  34   4      612.02      538.36    182.39 o
  -7  34   4     7992.34     7654.51    693.15 o
  -4  34   4     2470.31     2325.38    290.63 o
  -1  34   4      756.86      629.99    201.26 o
 -30  35   4     3345.17     3536.88    379.99 o
 -27  35   4      358.42      -16.98    105.50 o
 -24  35   4     1438.22     1611.01    304.17 o
 -21  35   4     6041.57     5608.43    440.47 o
 -18  35   4     1156.39     1270.70    244.91 o
 -15  35   4     4529.49     3804.03    425.02 o
 -12  35   4     3200.39     2962.84    338.99 o
  -9  35   4     1317.75     1341.12    252.47 o
  -6  35   4     4649.85     4213.75    461.40 o
  -3  35   4      166.06      178.48    126.09 o
 -29  36   4      884.37     1090.39    245.50 o
 -26  36   4        7.49       37.16    113.91 o
 -23  36   4     6524.01     6980.46    571.43 o
 -20  36   4      962.01      867.62    222.54 o
 -17  36   4     1530.51     1327.10    246.77 o
 -14  36   4     1851.41     1726.21    284.62 o
 -11  36   4       77.32      170.60    133.74 o
  -8  36   4     2431.79     1966.98    351.17 o
  -5  36   4     2106.88     1879.00    303.82 o
 -28  37   4      241.43      396.10    167.77 o
 -25  37   4     1152.95      878.42    253.80 o
 -22  37   4     5790.16     5907.33    787.50 o
 -19  37   4      250.36      262.27    147.93 o
 -16  37   4        7.51       47.55    120.12 o
 -13  37   4      325.49      430.49    170.88 o
 -10  37   4      183.21       87.52    149.55 o
 -27  38   4      412.84      376.61    183.42 o
 -24  38   4     1748.94     1619.28    322.03 o
 -21  38   4      289.54      127.22    140.45 o
 -18  38   4       12.91      -44.93    106.75 o
 -15  38   4     3812.66     4195.00    468.02 o
 -12  38   4       62.33       43.00    127.27 o
 -20  39   4       10.43      -46.03    112.36 o
 -17  39   4     2746.97     2669.54    347.39 o
   0   1   5    42694.88    56874.45    849.96 o
  -2   2   5    35155.92    39802.48    697.60 o
  -4   3   5     1743.19     1986.50     85.15 o
  -1   3   5      233.93      450.88     43.11 o
   2   3   5    34010.53    53485.39   1126.88 o
  -6   4   5    28888.95    29257.28   1046.30 o
  -3   4   5     4758.93     3220.35     91.03 o
   0   4   5    44409.17    41815.54   1051.72 o
   3   4   5    20594.38    15113.84    438.31 o
  -5   5   5     3846.18     8935.28    312.44 o
  -2   5   5   134602.81   130373.19   6095.34 o
   1   5   5    47830.84    41654.15   1193.11 o
   4   5   5   305957.69   265840.59   3236.30 o
  -7   6   5    21192.79    17906.95    529.41 o
  -4   6   5    52885.31    43266.82   1721.52 o
  -1   6   5    40912.51    44616.46   1372.08 o
   2   6   5      362.22       79.72     36.63 o
 -12   7   5   235930.13   239170.84   6478.48 o
  -6   7   5    67491.06    59196.10   2019.31 o
  -3   7   5     1787.05     4980.65    196.66 o
   0   7   5     2075.35     3141.09     99.65 o
   3   7   5   102594.34   107520.02   3673.79 o
   6   7   5    60418.93    68048.00   2351.69 o
 -14   8   5    32599.27    28133.97    647.70 o
  -8   8   5     1607.97     1156.33     83.31 o
  -5   8   5    10097.05     6000.78    256.17 o
  -2   8   5     2309.75     1731.46     87.40 o
   1   8   5    29251.13    30099.59   1109.86 o
   4   8   5    12155.53    13943.05    502.55 o
   7   8   5     7097.13     8536.34    351.04 o
 -16   9   5      212.56      146.90     58.00 o
 -13   9   5    93918.75   107503.25   3082.99 o
 -10   9   5    52114.07    55371.27   1759.88 o
  -7   9   5       15.40       47.26     42.87 o
  -4   9   5    50198.41    55992.04   1347.08 o
  -1   9   5     5268.43     4113.43    120.33 o
   2   9   5     1523.55     1821.67    111.97 o
   5   9   5     4629.55     5041.70    189.21 o
   8   9   5      525.27      452.29     83.18 o
 -18  10   5     1779.77     2240.08    151.19 o
 -15  10   5     8080.63    10465.35    273.44 o
 -12  10   5    38047.19    32522.35   1102.37 o
  -9  10   5     6160.08     5514.09    217.07 o
  -6  10   5     6189.23     5070.84    160.37 o
  -3  10   5    11837.48    12796.86    491.92 o
   0  10   5     8066.24     9239.44    273.95 o
   3  10   5       90.46      250.42     63.07 o
   6  10   5     2754.30     2809.40    152.31 o
   9  10   5        5.12        7.21     52.20 o
 -20  11   5      348.47      398.05     92.01 o
 -17  11   5     6199.60     8816.81    241.21 o
 -14  11   5     7414.89     8782.80    225.70 o
 -11  11   5     5222.22     4910.32    155.21 o
  -8  11   5     5678.66     6420.13    180.42 o
  -5  11   5    25236.11    25755.88    739.91 o
  -2  11   5     7547.93     5185.04    189.50 o
   1  11   5     2454.99     3211.20    138.32 o
   4  11   5      265.43     1241.69    109.48 o
   7  11   5     6454.30     7996.47    238.65 o
  10  11   5       61.01      -25.07     63.19 o
 -22  12   5     4560.87     5296.18    224.12 o
 -19  12   5     6818.29     6083.50    237.52 o
 -16  12   5       10.58       78.55     49.50 o
 -13  12   5    14646.81    15023.97    468.02 o
 -10  12   5    45745.65    45741.87   1499.64 o
  -7  12   5    16915.53    15998.42    492.53 o
  -4  12   5      383.20     1028.39     84.49 o
  -1  12   5    21768.96    20342.49    646.44 o
   2  12   5    12968.50    15666.33    515.98 o
   5  12   5     5348.41     6173.51    207.58 o
   8  12   5    10001.01     8745.09    290.36 o
  11  12   5     4350.28     4252.55    238.97 o
 -24  13   5     1956.55     2667.29    227.45 o
 -21  13   5      875.91     1077.10    137.54 o
 -18  13   5      112.26       34.18     50.51 o
 -15  13   5     1011.51     1067.42     99.11 o
 -12  13   5     4387.94     3865.62    150.82 o
  -9  13   5    12729.34    15607.04    488.06 o
  -6  13   5      184.20       65.80     46.39 o
  -3  13   5    12983.92    11703.04    267.02 o
   0  13   5     6646.40     6731.57    264.32 o
   3  13   5    18703.38    19222.00    473.91 o
   6  13   5     6878.23     6743.11    252.35 o
   9  13   5     1841.46     2245.40    185.83 o
  12  13   5    13089.49    12160.86    500.80 o
 -26  14   5     6011.37     5895.84    310.92 o
 -23  14   5     4887.73     4749.46    281.25 o
 -20  14   5     2490.37     2480.50    167.75 o
 -17  14   5     4762.93     4307.80    220.79 o
 -14  14   5    11590.02    13931.15    467.45 o
 -11  14   5      491.42      469.06     73.07 o
  -8  14   5    16533.84    17645.74    601.28 o
  -5  14   5      533.25      297.42     59.33 o
  -2  14   5     9873.79    10022.07    303.16 o
   1  14   5    17524.63    17111.13    520.83 o
   4  14   5     1231.91     1281.76    142.31 o
   7  14   5     8040.65     8083.31    368.31 o
  10  14   5       34.26       82.67     78.41 o
  13  14   5     1736.85     1896.81    214.12 o
 -28  15   5      512.34      545.38    134.82 o
 -25  15   5     1295.77     1891.03    208.34 o
 -22  15   5    20470.85    18282.01    617.56 o
 -19  15   5     1624.08     2023.37    155.02 o
 -16  15   5      508.63      303.80     70.81 o
 -13  15   5    33861.13    37170.00   1014.40 o
 -10  15   5    11293.74     9795.30    316.83 o
  -7  15   5      520.09      616.31     77.81 o
  -4  15   5    26453.78    27031.66    764.23 o
  -1  15   5      636.76      739.75     90.68 o
   2  15   5    13981.79    15131.88    377.59 o
   5  15   5     4099.22     4411.52    248.63 o
   8  15   5     2249.44     2238.03    193.05 o
  11  15   5     1427.48     1392.84    191.60 o
  14  15   5       21.08      -20.46     80.95 o
 -30  16   5     2704.89     2606.89    257.62 o
 -27  16   5     3518.70     4469.71    291.91 o
 -24  16   5     8607.42     9551.46    363.52 o
 -21  16   5     8543.06     7993.10    424.37 o
 -18  16   5     4464.03     4924.07    190.21 o
 -15  16   5    18623.36    20428.45    565.33 o
 -12  16   5    10273.71    12390.83    298.48 o
  -9  16   5     7912.67     7461.10    261.95 o
  -6  16   5     7434.12     7893.99    247.27 o
  -3  16   5    19199.26    20699.66    954.04 o
   0  16   5    14349.71    11051.15    312.57 o
   3  16   5     1066.21      456.35     98.44 o
   6  16   5      288.50      389.94    104.32 o
   9  16   5    18665.31    20901.52    688.86 o
  12  16   5     2395.70     2457.58    240.62 o
  15  16   5       81.88       31.31     87.76 o
 -32  17   5       42.67       -8.14     88.31 o
 -29  17   5    15572.88    16298.81    691.58 o
 -26  17   5     1088.38     1157.42    175.91 o
 -23  17   5     5801.44     5451.44    291.02 o
 -20  17   5     5143.94     5876.57    251.38 o
 -17  17   5      932.09      840.75    102.45 o
 -14  17   5    25781.81    22973.22    783.05 o
 -11  17   5       26.08      -22.89     44.19 o
  -8  17   5     2028.45     2157.81    129.34 o
  -5  17   5      784.27      670.60     94.89 o
  -2  17   5     1106.13     1469.12    145.47 o
   1  17   5        7.13      -22.18     60.37 o
   4  17   5       21.08      -17.14     62.55 o
   7  17   5    26476.79    29293.21    998.00 o
  10  17   5    21652.08    22955.19    677.30 o
  13  17   5     2120.63     2130.85    236.51 o
  16  17   5      188.62       96.63    111.08 o
 -34  18   5      291.36      259.28    133.14 o
 -31  18   5     1478.00     1615.41    216.96 o
 -28  18   5    10478.53    10609.88    409.60 o
 -25  18   5     1439.29     1546.20    177.05 o
 -22  18   5      409.56      458.34    108.18 o
 -19  18   5     1176.14     1455.18    140.84 o
 -16  18   5      667.20      739.56     98.42 o
 -13  18   5        0.95      -14.30     49.78 o
 -10  18   5       30.79       18.27     48.48 o
  -7  18   5    41728.90    43263.64   1762.15 o
  -4  18   5     4912.13     6150.90    214.74 o
  -1  18   5     1269.11     1138.93    137.75 o
   2  18   5      461.42      360.82     96.05 o
   5  18   5    10786.81    10575.02    458.82 o
   8  18   5    33472.39    34185.69   1231.04 o
  11  18   5    18574.98    19542.35    887.71 o
  14  18   5      381.10      522.78    153.06 o
  17  18   5       80.94      196.33    129.24 o
 -36  19   5        4.56       22.20     95.82 o
 -33  19   5      505.99      589.24    149.52 o
 -30  19   5     5929.69     5887.30    387.42 o
 -27  19   5      514.21      577.78    137.77 o
 -24  19   5     3730.63     3825.53    244.30 o
 -21  19   5       38.52       -9.78     64.81 o
 -18  19   5     5004.67     4819.38    220.83 o
 -15  19   5     1651.72     2207.70    147.59 o
 -12  19   5     6255.84     6424.58    222.44 o
  -9  19   5    42716.80    44954.17   1871.80 o
  -6  19   5    82689.88    84186.72   3297.85 o
  -3  19   5     2084.74     2365.10    194.61 o
   0  19   5      783.03      630.08    116.51 o
   3  19   5     3915.95     5282.37    258.90 o
   6  19   5    20557.47    20889.35    600.13 o
   9  19   5    30843.32    32800.38   1456.03 o
  12  19   5     1857.27     1847.10    245.01 o
  15  19   5     2022.72     2428.00    288.06 o
  18  19   5       53.72      170.35    124.07 o
 -38  20   5        3.03      -46.97    110.48 o
 -35  20   5      118.80      164.41    118.36 o
 -32  20   5       10.96        2.78     91.11 o
 -29  20   5     1467.57     1223.43    190.13 o
 -26  20   5       57.01      106.63     85.19 o
 -23  20   5    13212.45    12773.95    585.89 o
 -20  20   5     2336.00     2286.77    175.49 o
 -17  20   5     4010.61     4600.31    217.93 o
 -14  20   5      437.04      506.81     90.26 o
 -11  20   5     9055.70     9910.65    472.28 o
  -8  20   5   163032.45   170662.75   6347.84 o
  -5  20   5    13213.03    14809.18    405.87 o
  -2  20   5      331.15      462.30    103.16 o
   1  20   5      202.41      396.97    105.87 o
   4  20   5     2344.95     2671.02    234.97 o
   7  20   5    23430.38    24167.03    859.77 o
  10  20   5     4085.40     3954.41    326.00 o
  13  20   5     5452.53     5754.08    392.49 o
  16  20   5      941.77      707.25    183.06 o
 -37  21   5      569.67      751.95    211.99 o
 -34  21   5     1398.82     1216.22    214.33 o
 -31  21   5       74.10      -38.91     80.11 o
 -28  21   5       16.67        9.80     83.15 o
 -25  21   5    40627.96    39197.71   1304.88 o
 -22  21   5    11604.56    11998.96    373.59 o
 -19  21   5       14.43       56.16     64.86 o
 -16  21   5    11857.23    12195.00    308.87 o
 -13  21   5     1751.66     2092.82    160.26 o
 -10  21   5    95410.27   100044.23   3081.29 o
  -7  21   5    75489.98    80165.34   2784.00 o
  -4  21   5      354.28      108.36     74.69 o
  -1  21   5     1337.08      864.02    147.25 o
   2  21   5     5237.25     4760.61    295.60 o
   5  21   5     6767.52     6354.33    332.00 o
   8  21   5     2906.08     2642.94    279.85 o
  11  21   5     3397.95     4014.23    338.40 o
  14  21   5     2162.77     2022.95    270.90 o
  17  21   5       70.30      -26.30     98.65 o
 -36  22   5        3.39      -14.13    109.70 o
 -33  22   5      983.61      715.46    175.78 o
 -30  22   5       15.66       -2.26     84.14 o
 -27  22   5     5569.01     5274.60    294.59 o
 -24  22   5    43722.23    43361.97   1266.34 o
 -21  22   5     1935.23     2407.40    201.43 o
 -18  22   5       21.91      107.92     72.74 o
 -15  22   5      565.16      476.49     95.99 o
 -12  22   5    12216.72    12583.71    334.74 o
  -9  22   5    91085.48    96170.20   3554.76 o
  -6  22   5    12093.61    12786.67    648.12 o
  -3  22   5     4474.48     4572.40    307.01 o
   0  22   5     4878.03     4936.55    296.77 o
   3  22   5      734.49     1051.55    167.70 o
   6  22   5     7798.81     9147.67    580.34 o
   9  22   5     1162.45     1258.09    214.73 o
  12  22   5     3198.25     3341.54    321.63 o
  15  22   5     1428.29     1182.77    216.21 o
 -38  23   5     3224.77     3615.17    390.99 o
 -35  23   5      858.46      852.70    187.00 o
 -32  23   5       14.09       39.56     96.01 o
 -29  23   5       74.19        7.34     83.41 o
 -26  23   5    19614.04    18900.62    578.46 o
 -23  23   5    28993.21    28064.36    736.13 o
 -20  23   5     2906.44     1777.74    169.48 o
 -17  23   5     4122.04     4893.09    252.41 o
 -14  23   5     1103.55      901.91    123.72 o
 -11  23   5    31423.09    29097.58   1198.21 o
  -8  23   5    21284.61    20783.75    966.76 o
  -5  23   5     1563.19     1869.90    201.68 o
  -2  23   5    14018.72    15161.79    634.92 o
   1  23   5      141.25       64.83     90.83 o
   4  23   5      731.74      576.98    140.67 o
   7  23   5     2674.86     2748.78    288.35 o
  10  23   5     2006.49     1984.68    260.75 o
  13  23   5      694.28      947.33    202.14 o
 -37  24   5      729.44      819.09    213.24 o
 -34  24   5      300.95      254.54    130.22 o
 -31  24   5     1434.46     1424.89    223.53 o
 -28  24   5     7999.11     7394.22    391.26 o
 -25  24   5    25749.21    25406.27    911.22 o
 -22  24   5      217.20      352.99    107.63 o
 -19  24   5      190.19       51.19     77.83 o
 -16  24   5     5985.83     5240.84    274.30 o
 -13  24   5       83.76      348.09    100.36 o
 -10  24   5    21831.84    20676.97   1045.22 o
  -7  24   5     4633.69     4432.50    278.71 o
  -4  24   5      655.53      348.80    124.55 o
  -1  24   5     1590.02     2581.01    241.00 o
   2  24   5     1345.62     1773.75    216.35 o
   5  24   5     1725.42     2156.88    260.22 o
   8  24   5      760.49      694.63    171.64 o
  11  24   5       82.41        7.33     99.99 o
  14  24   5      130.93       48.97    113.21 o
 -36  25   5      501.68      448.62    156.80 o
 -33  25   5      399.29      284.27    133.53 o
 -30  25   5     1902.86     2195.71    243.35 o
 -27  25   5    11984.01    13618.43    473.22 o
 -24  25   5    12162.36    10606.55    434.52 o
 -21  25   5     2252.63     3000.88    228.15 o
 -18  25   5    12112.53    12248.86    507.21 o
 -15  25   5       76.66      127.75     92.77 o
 -12  25   5     5861.43     5770.04    268.78 o
  -9  25   5     3796.13     3474.45    257.29 o
  -6  25   5       58.32      232.44    102.94 o
  -3  25   5      468.66      804.77    155.51 o
   0  25   5     2276.54     2826.12    253.28 o
   3  25   5        0.41      -24.10     82.44 o
   6  25   5      779.34      545.42    162.50 o
   9  25   5      132.15      229.20    131.94 o
  12  25   5      745.82      561.52    164.95 o
 -38  26   5       23.60      240.74    178.96 o
 -35  26   5        0.43      -40.76    101.42 o
 -32  26   5     2122.90     2232.77    275.96 o
 -29  26   5     4347.16     4140.81    309.54 o
 -26  26   5    14524.89    13499.32    513.51 o
 -23  26   5     2052.27     2368.77    258.38 o
 -20  26   5      912.91     1442.64    191.79 o
 -17  26   5     8456.76     7601.01    338.28 o
 -14  26   5      286.65      327.10    111.53 o
 -11  26   5     7825.14     9788.97    489.03 o
  -8  26   5     3900.49     4052.80    277.36 o
  -5  26   5     4025.72     3767.23    309.00 o
  -2  26   5     2442.88     2476.84    239.57 o
   1  26   5     2020.70     2350.23    248.04 o
   4  26   5     3495.83     3680.41    326.09 o
   7  26   5      349.66      326.76    139.42 o
  10  26   5      874.54      977.28    204.68 o
 -37  27   5      660.88      636.68    196.17 o
 -34  27   5      981.72      692.84    181.25 o
 -31  27   5     4103.52     4273.00    354.45 o
 -28  27   5     1495.12     1951.16    257.97 o
 -25  27   5     2805.19     3120.21    332.76 o
 -22  27   5     5001.94     4159.95    358.49 o
 -19  27   5       24.14       21.81     94.19 o
 -16  27   5     1001.42      948.43    159.10 o
 -13  27   5      340.66      133.31    103.04 o
 -10  27   5     4050.70     4576.46    387.34 o
  -7  27   5        8.75      -72.66     72.66 o
  -4  27   5     1535.00     1417.89    193.27 o
  -1  27   5     5454.04     6153.46    383.83 o
   2  27   5      321.53      138.65    106.57 o
   5  27   5     3428.20     3420.01    326.54 o
   8  27   5      545.83      637.58    178.25 o
 -36  28   5        2.15      -74.41    108.65 o
 -33  28   5      963.97      785.44    213.57 o
 -30  28   5      317.45      224.72    146.29 o
 -27  28   5      876.78      846.54    206.71 o
 -24  28   5      644.50      822.66    194.54 o
 -21  28   5     2273.67     1691.87    226.32 o
 -18  28   5     1575.32     1894.94    237.92 o
 -15  28   5      248.65      166.20    122.62 o
 -12  28   5     4554.05     3787.00    309.08 o
  -9  28   5      136.21      217.14    105.87 o
  -6  28   5     1241.44     1299.54    190.19 o
  -3  28   5     5042.82     5248.80    360.96 o
   0  28   5      827.77     1029.39    181.45 o
   3  28   5     3894.38     3675.24    331.91 o
   6  28   5      176.54      171.86    130.49 o
   9  28   5      768.29      797.82    191.87 o
 -35  29   5        6.60       15.36    121.08 o
 -32  29   5       31.11       79.61    142.70 o
 -29  29   5     1278.74     1393.69    261.13 o
 -26  29   5     2450.48     2068.39    287.41 o
 -23  29   5     2904.61     3416.97    342.45 o
 -20  29   5     1227.96     1280.28    209.78 o
 -17  29   5     3418.46     3354.90    298.52 o
 -14  29   5       14.87       95.85    112.15 o
 -11  29   5    10306.37     9025.10    688.60 o
  -8  29   5      223.82      536.52    134.45 o
  -5  29   5      394.45      345.67    123.58 o
  -2  29   5      937.74     1203.39    188.89 o
   1  29   5      531.80      614.60    155.16 o
   4  29   5      658.34      704.23    185.04 o
   7  29   5     1762.33     2347.69    296.10 o
 -34  30   5      517.11      503.49    220.68 o
 -31  30   5       36.01        0.07    111.49 o
 -28  30   5     2921.12     3079.25    349.45 o
 -25  30   5     1339.47      823.05    204.96 o
 -22  30   5     2167.81     2780.62    284.93 o
 -19  30   5     2636.45     2579.83    271.70 o
 -16  30   5     2126.48     2237.94    292.78 o
 -13  30   5     4266.05     3524.26    370.51 o
 -10  30   5     1249.45      960.84    241.54 o
  -7  30   5      317.55      178.10    131.02 o
  -4  30   5       12.31       51.86     98.34 o
  -1  30   5     1572.07     1581.42    217.54 o
   2  30   5     1196.34      775.67    188.13 o
   5  30   5      166.26      218.99    131.26 o
 -33  31   5      362.51      218.78    173.47 o
 -30  31   5      592.59      499.20    179.88 o
 -27  31   5    10885.06    11084.20    553.34 o
 -24  31   5       80.68       56.80    115.41 o
 -21  31   5     1709.29     2162.26    258.96 o
 -18  31   5     2634.52     2911.48    376.89 o
 -15  31   5      195.38      154.99    127.36 o
 -12  31   5      692.52     1021.79    222.83 o
  -9  31   5      109.17      117.13    122.28 o
  -6  31   5      542.15      695.92    171.24 o
  -3  31   5        0.62      -10.21     96.96 o
   0  31   5       97.00      -15.66     94.41 o
   3  31   5        3.33       39.71    125.20 o
 -35  32   5      293.54      532.85    218.87 o
 -32  32   5      430.80      371.74    173.64 o
 -29  32   5     2276.33     3144.28    359.24 o
 -26  32   5     4213.12     3965.03    379.90 o
 -23  32   5      357.17      319.84    144.94 o
 -20  32   5        1.00       73.89    106.91 o
 -17  32   5      652.49      518.99    172.18 o
 -14  32   5        2.62       18.65    112.91 o
 -11  32   5        0.93      -24.06    118.46 o
  -8  32   5      107.80      483.64    198.51 o
  -5  32   5     3720.66     3806.24    335.26 o
  -2  32   5       12.63      -22.59     96.47 o
   1  32   5      130.62      219.52    149.56 o
 -34  33   5       65.29      135.54    161.69 o
 -31  33   5      115.84      208.81    148.37 o
 -28  33   5     2082.41     2109.91    313.22 o
 -25  33   5      280.26      178.11    125.62 o
 -22  33   5      276.16      260.17    144.37 o
 -19  33   5     1506.61     1411.45    249.31 o
 -16  33   5       17.95       93.55    126.37 o
 -13  33   5      471.47      502.62    172.10 o
 -10  33   5      539.96      614.39    183.92 o
  -7  33   5     4614.89     4305.24    396.49 o
  -4  33   5     2866.73     2744.56    305.38 o
  -1  33   5       17.85       68.10    129.62 o
 -33  34   5      760.82      443.39    180.16 o
 -30  34   5       11.16        6.43    124.82 o
 -27  34   5       53.73       15.26    117.79 o
 -24  34   5       56.52      -93.01     93.01 o
 -21  34   5     3741.18     4053.17    386.83 o
 -18  34   5      547.17      422.62    166.92 o
 -15  34   5      478.91      490.77    177.16 o
 -12  34   5      895.68      936.89    215.05 o
  -9  34   5      533.57      382.38    181.88 o
  -6  34   5     6121.98     5945.04    457.62 o
  -3  34   5     1340.73     1129.68    218.74 o
 -32  35   5     1168.11     1416.27    273.41 o
 -29  35   5       31.46      -43.77    113.01 o
 -26  35   5       58.95      -89.52    100.03 o
 -23  35   5     1596.22     1317.27    289.57 o
 -20  35   5     3635.43     3647.38    373.98 o
 -17  35   5      268.30      224.77    135.77 o
 -14  35   5     2241.11     2335.52    314.56 o
 -11  35   5       47.81      -19.90    120.09 o
  -8  35   5     3290.29     3836.96    387.84 o
  -5  35   5     2166.24     2245.54    324.86 o
 -28  36   5      447.14      645.07    208.71 o
 -25  36   5     1514.46     1595.41    409.83 o
 -22  36   5     5520.15     4770.40    469.40 o
 -19  36   5      108.07      249.00    146.32 o
 -16  36   5      328.29      220.25    136.01 o
 -13  36   5      226.14      324.80    155.73 o
 -10  36   5      255.41      265.89    144.47 o
  -7  36   5     2294.46     2063.48    312.57 o
 -27  37   5        0.29      -25.76    130.12 o
 -24  37   5     3364.16     3229.92    423.54 o
 -21  37   5     2292.34     1985.80    306.18 o
 -18  37   5      118.26       66.31    122.80 o
 -15  37   5     1587.41     1935.08    343.68 o
 -12  37   5       11.31       32.77    136.76 o
  -9  37   5     1214.20     1833.84    299.14 o
 -26  38   5      893.63     1059.26    270.75 o
 -23  38   5     2656.97     2545.04    387.60 o
 -20  38   5      145.06      233.82    150.75 o
 -17  38   5      772.68      662.85    202.75 o
 -14  38   5     1832.22     1463.11    319.44 o
   0   0   6    25209.12    38265.00   1063.99 o
   1   1   6   147151.66   135938.30   2311.21 o
  -1   2   6    35435.84    33074.01    475.89 o
   2   2   6    52201.75    43528.39    740.29 o
  -3   3   6    37057.67    43286.18    909.71 o
   0   3   6    92369.45    83624.31   1583.01 o
   3   3   6   115610.75   110455.64   2552.04 o
  -5   4   6    32378.88    41373.79   1318.73 o
  -2   4   6     3664.97     3043.96    110.26 o
   1   4   6     9947.10    14796.35    400.64 o
   4   4   6   202328.17   202151.45   7599.24 o
  -7   5   6    80603.02    90720.13   2889.36 o
  -4   5   6       14.25      511.91     58.20 o
  -1   5   6    42991.12    41233.15   1394.80 o
   2   5   6    39070.66    40625.89   1151.52 o
   5   5   6   202992.22   218073.50   5924.11 o
  -6   6   6     7211.55     7682.70    221.18 o
  -3   6   6      446.65      146.81     49.29 o
   0   6   6    65410.54    57422.00   1888.60 o
   3   6   6   145371.73   152758.72   4288.90 o
   6   6   6    14976.70    13694.31    422.01 o
 -11   7   6   167760.27   164186.03   4199.88 o
  -8   7   6    11835.36     9976.00    250.32 o
  -5   7   6     7305.21     9158.75    395.94 o
  -2   7   6    27976.84    30594.47   1053.19 o
   1   7   6     1953.01     3685.34    127.22 o
   4   7   6    70001.73    71386.15   2131.09 o
   7   7   6     2176.86     2688.77    148.22 o
 -13   8   6    80848.73    88973.93   2549.47 o
 -10   8   6    80694.66    87654.54   2305.04 o
  -7   8   6    14080.20    15792.06    574.94 o
  -4   8   6     3415.69     3240.53    153.60 o
  -1   8   6      275.45      195.32     57.40 o
   2   8   6    17721.35    21126.73    593.33 o
   5   8   6     1191.55      360.27     70.81 o
   8   8   6      905.12     1270.67    118.41 o
 -15   9   6      953.26      634.00     90.58 o
 -12   9   6    52320.09    49675.16   1424.38 o
  -9   9   6      531.81      373.69     63.65 o
  -6   9   6    26950.40    25452.55    789.35 o
  -3   9   6     1045.51     1341.43     99.86 o
   0   9   6    36669.10    35521.58   1164.47 o
   3   9   6     5707.06     6194.50    233.75 o
   6   9   6      781.81      315.95     72.13 o
   9   9   6     1416.58     1590.80    135.41 o
 -17  10   6     3371.13     3064.84    169.87 o
 -14  10   6     9442.95     8136.69    222.01 o
 -11  10   6     1995.06     2305.56    120.03 o
  -8  10   6    34586.08    37579.27   1155.97 o
  -5  10   6    13928.28    11399.18    348.08 o
  -2  10   6    13133.50    14246.46    363.68 o
   1  10   6    71693.08    71054.13   2836.79 o
   4  10   6     3678.42     3959.79    165.19 o
   7  10   6       24.28      445.78     81.55 o
  10  10   6      225.32      909.87    122.57 o
 -19  11   6     1749.95     1172.63    125.61 o
 -16  11   6      232.06      -29.97     39.76 o
 -13  11   6     1720.44     1812.96    115.84 o
 -10  11   6    20859.28    24551.44    818.98 o
  -7  11   6    40465.73    41841.34   1117.42 o
  -4  11   6    18066.22    15582.69    522.63 o
  -1  11   6     2690.61     2449.80    108.66 o
   2  11   6    21172.09    24125.66    542.69 o
   5  11   6    20499.70    20546.27    574.91 o
   8  11   6     6611.24     4992.43    203.79 o
  11  11   6     4416.87     4120.23    238.09 o
 -21  12   6     1769.61     3397.65    205.62 o
 -18  12   6      475.77     1421.98    132.55 o
 -15  12   6     9799.48     9507.57    342.73 o
 -12  12   6     2201.47     2553.23    132.27 o
  -9  12   6      390.94      292.78     62.67 o
  -6  12   6    21044.37    23103.07    574.50 o
  -3  12   6    22498.17    25017.70    569.86 o
   0  12   6     9996.68     8831.44    264.97 o
   3  12   6    63807.16    65593.62   2111.52 o
   6  12   6      889.26      967.49    114.03 o
   9  12   6     1502.52     1726.63    167.34 o
  12  12   6    22287.95    20136.55    593.05 o
 -23  13   6     7431.27     6866.15    290.75 o
 -20  13   6     1294.98     2155.89    163.85 o
 -17  13   6        2.46      -12.16     46.49 o
 -14  13   6    11253.13    12949.92    463.70 o
 -11  13   6    33722.44    35057.04   1333.59 o
  -8  13   6    11874.40    12578.29    366.05 o
  -5  13   6       58.16       81.47     46.67 o
  -2  13   6    10227.57    11429.98    312.58 o
   1  13   6    64283.69    63806.34   2093.17 o
   4  13   6    18523.29    16881.07    382.19 o
   7  13   6     3336.79     3904.64    227.24 o
  10  13   6     4991.46     5041.61    260.13 o
  13  13   6     8627.60     9268.33    373.37 o
 -25  14   6     5640.65     5886.13    303.73 o
 -22  14   6     2687.25     2454.11    179.15 o
 -19  14   6       22.99       56.66     61.72 o
 -16  14   6    11892.15    12773.47    500.92 o
 -13  14   6    67311.57    71321.91   2698.19 o
 -10  14   6    10360.12    14013.85    491.82 o
  -7  14   6     9850.00     8752.29    377.93 o
  -4  14   6    21525.07    20130.24    524.46 o
  -1  14   6    16497.96    15605.56    616.04 o
   2  14   6    80001.16    79282.31   2289.46 o
   5  14   6     5464.63     4800.09    230.74 o
   8  14   6    10916.28    10730.29    342.47 o
  11  14   6     1750.62     1552.88    192.39 o
  14  14   6      175.31      110.57     97.07 o
 -27  15   6     1925.66     2076.21    222.81 o
 -24  15   6    17299.27    16303.16    558.91 o
 -21  15   6     1414.34     1815.98    156.54 o
 -18  15   6     1952.38     2620.31    168.59 o
 -15  15   6    69557.80    70238.80   2155.82 o
 -12  15   6    73536.55    76169.95   2117.81 o
  -9  15   6    17491.79    18767.37    681.56 o
  -6  15   6    16075.82    16605.59    523.92 o
  -3  15   6     4769.82     6508.19    205.74 o
   0  15   6    72788.90    72486.52   2284.68 o
   3  15   6     6932.52     6177.85    248.56 o
   6  15   6        4.51      123.24     76.51 o
   9  15   6       94.48       43.44     79.94 o
  12  15   6     2044.03     1938.79    211.07 o
  15  15   6     4136.02     3785.56    321.55 o
 -29  16   6    19061.44    18506.56    796.33 o
 -26  16   6     1126.78     1397.60    185.33 o
 -23  16   6     3674.13     3521.50    229.40 o
 -20  16   6    10999.84    11961.72    437.22 o
 -17  16   6    13367.10    10340.93    400.68 o
 -14  16   6   123736.39   123378.55   3473.97 o
 -11  16   6     1183.50      952.43    100.92 o
  -8  16   6    16562.49    16064.68    496.14 o
  -5  16   6    12795.83    12281.53    420.82 o
  -2  16   6     3600.95     3531.33    190.87 o
   1  16   6    35620.80    34929.29   1124.20 o
   4  16   6     3644.30     4046.65    231.33 o
   7  16   6     8288.36     8693.66    316.87 o
  10  16   6     1060.86     1116.27    172.72 o
  13  16   6     1354.55     1410.10    217.04 o
  16  16   6     2732.15     2370.97    272.01 o
 -31  17   6    14863.06    15826.47    845.09 o
 -28  17   6    22932.13    20568.88    564.37 o
 -25  17   6    12603.50    10602.62    566.41 o
 -22  17   6     3962.44     4697.04    250.97 o
 -19  17   6     6208.47     7169.63    249.95 o
 -16  17   6    25756.59    26412.62    913.35 o
 -13  17   6    82538.24    82005.52   2506.18 o
 -10  17   6        1.49       51.78     51.13 o
  -7  17   6     1106.84     1371.14    114.99 o
  -4  17   6      738.91      958.79    109.22 o
  -1  17   6    25378.66    24150.21    705.10 o
   2  17   6     2503.90     2285.10    184.89 o
   5  17   6     5265.25     5619.09    260.94 o
   8  17   6    13199.20    13330.78    439.83 o
  11  17   6     2337.10     2980.61    289.72 o
  14  17   6      782.91      499.63    153.61 o
  17  17   6      191.78      304.28    138.34 o
 -33  18   6      450.92      428.32    150.66 o
 -30  18   6    28264.41    28390.82   1083.28 o
 -27  18   6      597.09      700.06    149.87 o
 -24  18   6     3037.67     2998.74    241.61 o
 -21  18   6      103.09      176.00     84.83 o
 -18  18   6     2113.87     2253.40    187.81 o
 -15  18   6     9039.49    11023.86    427.35 o
 -12  18   6     3343.43     3417.16    167.42 o
  -9  18   6       93.16      210.54     64.77 o
  -6  18   6    10500.52    12008.00    409.03 o
  -3  18   6     6192.98     6508.53    249.59 o
   0  18   6       11.35       10.34     65.87 o
   3  18   6     3877.74     3257.67    242.45 o
   6  18   6    41718.83    43087.26   1927.17 o
   9  18   6    18205.36    18509.91    702.05 o
  12  18   6     3352.45     3715.35    373.74 o
  15  18   6     1253.73     1310.72    220.84 o
  18  18   6       51.94       92.53    111.71 o
 -35  19   6      482.41      440.96    153.56 o
 -32  19   6     5163.61     5708.66    354.28 o
 -29  19   6    11838.35    11677.87    440.28 o
 -26  19   6    12080.11    11217.25    452.14 o
 -23  19   6     5496.77     4878.91    279.02 o
 -20  19   6     1456.45     1541.42    164.58 o
 -17  19   6     4233.90     4542.05    195.60 o
 -14  19   6     1598.70     1333.27    125.28 o
 -11  19   6      318.77       88.66     57.26 o
  -8  19   6    36693.44    38103.23   1361.94 o
  -5  19   6    18118.97    17271.93    620.72 o
  -2  19   6    13639.73    13054.90    491.62 o
   1  19   6      227.76      333.10    108.40 o
   4  19   6     1681.92     1485.14    185.48 o
   7  19   6    32895.51    33802.60   1771.30 o
  10  19   6     2301.50     2927.23    290.94 o
  13  19   6     1902.48     2140.71    257.55 o
  16  19   6      437.86      513.40    162.01 o
  19  19   6      300.50      294.60    139.53 o
 -37  20   6      212.36      342.93    146.35 o
 -34  20   6      421.62      606.82    165.10 o
 -31  20   6     7019.06     6579.50    365.69 o
 -28  20   6      134.84      127.61     98.58 o
 -25  20   6      846.84      900.92    147.44 o
 -22  20   6    18088.65    18084.86    455.15 o
 -19  20   6     1032.62     1317.82    143.41 o
 -16  20   6       33.35       54.03     63.30 o
 -13  20   6     1490.09     1321.74    125.12 o
 -10  20   6    29615.55    28609.21   1043.75 o
  -7  20   6    54654.58    56393.83   3105.94 o
  -4  20   6    19968.31    19384.54    912.18 o
  -1  20   6     1398.91     1489.66    179.62 o
   2  20   6     3967.05     5446.22    302.66 o
   5  20   6     8882.96    10467.83    564.57 o
   8  20   6     4745.71     4248.84    329.53 o
  11  20   6      296.43      305.19    131.37 o
  14  20   6     1186.68     1010.57    197.25 o
  17  20   6       41.06       -6.81    100.50 o
 -36  21   6      583.79      573.76    189.91 o
 -33  21   6       84.77      143.80    108.82 o
 -30  21   6      549.99      720.06    156.84 o
 -27  21   6       15.70      117.08    104.43 o
 -24  21   6    28158.71    26975.38    853.03 o
 -21  21   6    18318.76    19433.27    511.19 o
 -18  21   6       18.86      -32.49     61.36 o
 -15  21   6       50.80      119.71     65.97 o
 -12  21   6     3377.16     2965.04    203.91 o
  -9  21   6    52012.12    54834.29   2808.13 o
  -6  21   6    28504.96    27737.05   1609.03 o
  -3  21   6      320.26      189.52     92.24 o
   0  21   6     3784.27     4418.68    280.28 o
   3  21   6      871.41      874.00    157.10 o
   6  21   6     5533.53     5982.63    396.07 o
   9  21   6      370.86      364.15    141.46 o
  12  21   6     1173.68     1034.30    201.60 o
  15  21   6     2027.57     1701.60    254.04 o
 -38  22   6     1732.26     1520.68    281.06 o
 -35  22   6       10.79       26.59    113.69 o
 -32  22   6        1.97      -15.56     86.22 o
 -29  22   6      769.37      788.17    159.18 o
 -26  22   6    12017.70    11224.24    386.73 o
 -23  22   6    49652.48    46814.66    972.61 o
 -20  22   6       39.50       78.72     73.25 o
 -17  22   6     1119.11     1483.36    149.18 o
 -14  22   6     1322.27     2203.20    233.45 o
 -11  22   6     6077.67     6328.81    317.74 o
  -8  22   6    30424.21    27504.72   1562.40 o
  -5  22   6       16.06       74.11     82.20 o
  -2  22   6     1679.38     2762.86    244.28 o
   1  22   6      151.95      238.58    105.24 o
   4  22   6        7.09       79.42     89.99 o
   7  22   6        0.98      -71.99     71.99 o
  10  22   6      351.12      518.62    160.47 o
  13  22   6      994.70      928.69    196.46 o
  16  22   6      190.87      218.16    130.65 o
 -37  23   6     1791.12     2170.39    315.27 o
 -34  23   6      216.37      229.11    129.31 o
 -31  23   6      130.20       54.46     92.49 o
 -28  23   6      269.31      172.55    104.16 o
 -25  23   6    18071.87    18689.49    577.59 o
 -22  23   6     6487.31     5407.20    287.32 o
 -19  23   6     6967.01     7720.66    343.63 o
 -16  23   6     1521.39     1809.52    193.32 o
 -13  23   6        1.99       55.08     71.11 o
 -10  23   6     3440.58     4495.13    489.26 o
  -7  23   6     6391.82     5945.66    360.48 o
  -4  23   6       28.66        3.16     75.58 o
  -1  23   6     7339.06     7021.11    332.01 o
   2  23   6     4306.88     4291.98    294.14 o
   5  23   6      290.18      335.64    122.83 o
   8  23   6      301.63      286.55    129.72 o
  11  23   6       88.73       88.78    112.38 o
  14  23   6      544.40      468.40    158.31 o
 -36  24   6       50.81       76.85    124.16 o
 -33  24   6       65.31      118.32    114.67 o
 -30  24   6       64.90      124.06    113.11 o
 -27  24   6     2202.64     2218.15    220.81 o
 -24  24   6    14668.84    12115.18    399.77 o
 -21  24   6     2662.11     2789.19    242.21 o
 -18  24   6      529.67      341.23    110.97 o
 -15  24   6     1127.74      866.30    150.92 o
 -12  24   6       42.56        0.03     70.64 o
  -9  24   6      308.98      470.13    122.34 o
  -6  24   6      169.64       27.16     78.66 o
  -3  24   6     1338.76     1682.69    201.56 o
   0  24   6       11.04       31.45     83.87 o
   3  24   6     1473.71     1071.70    176.91 o
   6  24   6     1571.67     1614.00    232.39 o
   9  24   6      262.56      298.81    137.52 o
  12  24   6       82.55      197.27    131.40 o
 -35  25   6       36.65      -40.51     93.26 o
 -32  25   6      243.50      133.52    107.01 o
 -29  25   6      541.02      824.04    180.90 o
 -26  25   6     6133.28     7148.71    353.54 o
 -23  25   6      189.93      318.46    117.09 o
 -20  25   6     2430.43     2453.37    229.71 o
 -17  25   6    13559.24    13838.77    813.56 o
 -14  25   6      890.46     1017.44    150.45 o
 -11  25   6      130.06      325.85    112.44 o
  -8  25   6     2208.89     3098.63    274.44 o
  -5  25   6     4441.74     4670.85    329.16 o
  -2  25   6       36.43       54.97     90.05 o
   1  25   6     3152.33     3029.56    264.06 o
   4  25   6       46.94      108.09     92.59 o
   7  25   6      849.83     1050.59    205.21 o
  10  25   6      248.49      311.71    143.24 o
 -37  26   6      597.42      345.58    167.45 o
 -34  26   6      248.64      132.24    117.38 o
 -31  26   6     1180.01     1109.18    232.02 o
 -28  26   6       87.46      -53.46     91.08 o
 -25  26   6     2249.08     2636.23    309.02 o
 -22  26   6     6935.67     6029.83    357.36 o
 -19  26   6      131.12      185.89     97.08 o
 -16  26   6      369.42      175.60     95.80 o
 -13  26   6     1720.80     1697.08    199.28 o
 -10  26   6     2489.88     3094.52    251.62 o
  -7  26   6      201.96       33.92     83.10 o
  -4  26   6     3437.66     2811.28    251.85 o
  -1  26   6     8428.82     8873.06    385.80 o
   2  26   6     1077.77      921.51    172.12 o
   5  26   6     2299.05     2336.25    279.67 o
   8  26   6       10.56      -87.44     87.44 o
  11  26   6      869.58     1079.26    217.23 o
 -36  27   6       45.01      -15.99    113.84 o
 -33  27   6      507.42      685.64    198.81 o
 -30  27   6      351.22      306.14    134.11 o
 -27  27   6     1149.02      891.93    211.20 o
 -24  27   6      160.78      309.03    145.82 o
 -21  27   6     2083.51     1629.67    224.50 o
 -18  27   6      429.42      520.69    131.46 o
 -15  27   6       21.06       20.95     79.17 o
 -12  27   6     4162.59     3760.15    272.79 o
  -9  27   6     1568.99     1678.91    227.57 o
  -6  27   6     1137.66      970.35    169.56 o
  -3  27   6     7223.14     7172.82    353.72 o
   0  27   6     3242.95     3422.37    285.44 o
   3  27   6     5216.94     5214.78    494.62 o
   6  27   6     4475.75     4093.60    388.21 o
   9  27   6      201.05      195.89    127.94 o
 -35  28   6      437.22      454.98    183.08 o
 -32  28   6      781.06      892.23    216.68 o
 -29  28   6       15.11      -69.01     91.67 o
 -26  28   6       59.99       76.90    116.12 o
 -23  28   6     9854.83    10042.81    908.72 o
 -20  28   6      385.91      325.57    126.85 o
 -17  28   6     5547.49     4424.59    295.65 o
 -14  28   6        3.87       20.45     91.06 o
 -11  28   6     9980.80    11230.71    902.69 o
  -8  28   6      221.62      257.12    106.98 o
  -5  28   6     2733.29     2873.15    258.86 o
  -2  28   6     3652.80     4111.95    305.75 o
   1  28   6       89.48       41.27     91.90 o
   4  28   6     7335.72     7668.19    449.82 o
   7  28   6       20.72      -87.85     87.85 o
 -34  29   6       88.08      118.64    165.32 o
 -31  29   6      167.46      205.23    139.52 o
 -28  29   6      863.08      987.99    221.49 o
 -25  29   6      127.01       65.68    116.49 o
 -22  29   6     6284.75     6215.85    436.13 o
 -19  29   6     3247.28     4061.33    322.14 o
 -16  29   6     5963.12     5342.35    525.93 o
 -13  29   6    11550.87    12499.82    676.75 o
 -10  29   6     6521.17     7445.45    448.86 o
  -7  29   6     1234.41     1412.65    198.87 o
  -4  29   6     2142.98     2023.01    231.67 o
  -1  29   6      538.27      542.50    146.61 o
   2  29   6     4536.67     4387.02    361.59 o
   5  29   6     1917.67     1846.16    266.01 o
 -33  30   6      121.48      -31.64    133.30 o
 -30  30   6     1375.30     1614.58    274.75 o
 -27  30   6     6095.68     6559.06    455.11 o
 -24  30   6      365.76      438.00    165.74 o
 -21  30   6     6028.62     6096.62    388.93 o
 -18  30   6     2160.70     2592.60    309.73 o
 -15  30   6       47.34      133.71    125.16 o
 -12  30   6    16391.30    15396.40    800.26 o
  -9  30   6      449.28      696.74    161.92 o
  -6  30   6      927.41     1167.66    185.47 o
  -3  30   6      594.67      446.98    132.83 o
   0  30   6       75.40       18.27     92.86 o
   3  30   6     3075.94     3244.37    329.81 o
 -35  31   6      435.46      280.66    185.65 o
 -32  31   6      536.67      682.41    203.44 o
 -29  31   6     7584.29     8458.36    564.64 o
 -26  31   6     9912.96    10979.09    638.02 o
 -23  31   6     1885.33     1964.87    366.86 o
 -20  31   6     1757.65     1775.31    268.09 o
 -17  31   6     1403.56     1172.34    230.01 o
 -14  31   6     4373.05     3836.73    411.07 o
 -11  31   6     6280.54     5729.78    493.25 o
  -8  31   6       53.55       43.47     98.26 o
  -5  31   6      270.80      305.17    133.95 o
  -2  31   6      191.73      222.41    123.17 o
   1  31   6      942.29     1143.34    212.53 o
   4  31   6      175.39      341.65    148.68 o
 -34  32   6      143.63      128.10    156.13 o
 -31  32   6      139.01      363.39    165.08 o
 -28  32   6     9938.28    10195.13    544.14 o
 -25  32   6      447.45      401.57    168.27 o
 -22  32   6      709.13      530.07    177.93 o
 -19  32   6        8.34      153.32    125.70 o
 -16  32   6       61.18       47.85    114.49 o
 -13  32   6     6342.18     6066.53    654.78 o
 -10  32   6       96.08       27.36    108.02 o
  -7  32   6      290.46      176.34    117.88 o
  -4  32   6       55.91       53.14    105.11 o
  -1  32   6       34.53      -33.51     88.09 o
   2  32   6      670.19      849.43    220.89 o
 -33  33   6       22.94      -64.81    117.68 o
 -30  33   6     4746.36     5146.37    441.49 o
 -27  33   6     5849.66     5882.02    461.84 o
 -24  33   6      391.76      364.77    163.96 o
 -21  33   6      147.97      124.28    121.82 o
 -18  33   6      900.29     1113.13    228.68 o
 -15  33   6     2479.18     2856.93    339.72 o
 -12  33   6      791.98      659.43    223.15 o
  -9  33   6       66.93       36.54    109.38 o
  -6  33   6     3003.60     3418.66    448.89 o
  -3  33   6     1348.85     1456.14    236.73 o
   0  33   6      259.81      106.62    137.64 o
 -32  34   6      267.97      317.91    166.33 o
 -29  34   6     3571.90     4446.91    418.79 o
 -26  34   6       25.50      -27.06    114.20 o
 -23  34   6        2.84       -3.02    127.58 o
 -20  34   6     2321.61     1704.69    278.07 o
 -17  34   6     2591.50     2735.62    325.34 o
 -14  34   6      651.91      689.92    194.34 o
 -11  34   6        5.84       40.22    109.46 o
  -8  34   6     2090.17     2504.56    333.37 o
  -5  34   6     2071.12     2025.94    526.22 o
  -2  34   6     1034.19     1142.68    223.06 o
 -31  35   6      637.09      647.91    207.21 o
 -28  35   6      209.92      274.67    151.79 o
 -25  35   6        0.29      130.20    142.97 o
 -22  35   6     2365.10     1907.06    408.56 o
 -19  35   6     1044.58      774.43    206.39 o
 -16  35   6      191.09      127.82    131.16 o
 -13  35   6       56.97       -0.46    102.50 o
 -10  35   6      252.68      310.60    156.58 o
  -7  35   6     2697.11     2462.23    331.51 o
  -4  35   6      627.50      698.82    183.84 o
 -27  36   6       72.59      -27.00    123.88 o
 -24  36   6     1080.72     1052.31    270.31 o
 -21  36   6     4107.46     4363.01    442.51 o
 -18  36   6      345.12      359.71    164.86 o
 -15  36   6       66.40      268.70    213.78 o
 -12  36   6        1.10      -78.76     98.35 o
  -9  36   6      496.07      587.21    187.64 o
 -26  37   6      166.87      162.63    159.21 o
 -23  37   6     1462.58     1466.67    310.27 o
 -20  37   6     1295.62     1207.54    250.62 o
 -17  37   6      334.04      371.73    194.55 o
 -14  37   6     1302.53     1332.54    298.90 o
 -11  37   6      231.38       -3.76    114.35 o
 -22  38   6     1761.94     2028.20    394.15 o
 -19  38   6       13.01      -16.34    131.66 o
 -16  38   6     4046.57     4381.46    416.78 o
  -1   1   7    64200.66    46237.61    791.66 o
  -3   2   7    68217.70    66320.55   1091.61 o
   0   2   7     9948.68     8827.19    206.24 o
  -5   3   7    52062.98    51288.48   1107.11 o
  -2   3   7    42518.16    47236.95    758.73 o
   1   3   7     3839.63     3274.61    108.79 o
  -7   4   7     1954.47     1597.41     93.57 o
  -4   4   7    16095.15    18541.74    540.35 o
  -1   4   7     1209.18     1013.87     66.38 o
   2   4   7    31347.16    35255.34    694.82 o
  -9   5   7    19441.07    16005.09    465.14 o
  -6   5   7       91.41      245.74     53.46 o
  -3   5   7    10395.54    11878.74    328.16 o
   0   5   7     3510.18     1756.59    106.04 o
   3   5   7     6434.34     6013.82    165.62 o
 -11   6   7    16904.92    14908.81    486.22 o
  -8   6   7      205.33      769.70     76.40 o
  -5   6   7      345.32      517.85     65.72 o
  -2   6   7      352.28      482.77     73.25 o
   1   6   7    63404.11    55132.89   2170.00 o
   4   6   7       43.25      108.01     44.08 o
 -13   7   7     1219.05     2195.79    124.94 o
 -10   7   7    21250.17    17402.96    403.25 o
  -7   7   7     7742.76     7109.23    264.98 o
  -4   7   7     9607.42     7258.05    225.40 o
  -1   7   7     1673.06     1905.98    114.39 o
   2   7   7     1812.79     1950.85     97.21 o
   5   7   7      786.40      504.01     84.97 o
 -15   8   7    21458.75    21569.52    701.40 o
 -12   8   7     1192.30     1469.77    103.51 o
  -9   8   7     6961.45     7032.23    213.55 o
  -6   8   7     3379.94     2711.27    143.67 o
  -3   8   7    64389.52    56370.89   2331.61 o
   0   8   7      334.23      535.13     74.90 o
   3   8   7    45215.19    43614.61   1309.00 o
   6   8   7    20079.30    20545.54    490.48 o
 -17   9   7     1080.03     1626.76    135.46 o
 -14   9   7    11733.39    13233.70    440.46 o
 -11   9   7     5467.65     5317.57    163.34 o
  -8   9   7    10274.73     7621.44    228.86 o
  -5   9   7     7853.31     5350.72    173.54 o
  -2   9   7      516.16      380.70     71.92 o
   1   9   7    41623.88    45213.48   1496.83 o
   4   9   7    20039.13    20277.48    791.80 o
   7   9   7     2443.97     1900.66    140.43 o
 -19  10   7     9119.49     9990.51    513.30 o
 -16  10   7     2234.41     1647.47    135.05 o
 -13  10   7    19643.65    21470.21    723.60 o
 -10  10   7     1964.98     1647.65    108.92 o
  -7  10   7     1521.79     1582.22     98.23 o
  -4  10   7     8444.34    10088.69    313.25 o
  -1  10   7     6518.98     6980.40    340.20 o
   2  10   7     3984.47     4485.75    199.44 o
   5  10   7      101.21       87.43     55.85 o
   8  10   7      642.79      973.44    114.86 o
 -21  11   7      412.33      623.01    109.26 o
 -18  11   7     2031.80     2904.63    188.70 o
 -15  11   7      309.88      271.95     64.61 o
 -12  11   7     2252.01     1491.33    110.48 o
  -9  11   7    47957.16    50305.93   1630.68 o
  -6  11   7     3637.61     4212.80    144.64 o
  -3  11   7     4467.33     4787.63    223.51 o
   0  11   7    11302.03    12179.08    539.00 o
   3  11   7    54989.57    49107.48   1269.90 o
   6  11   7     8960.24     9577.28    407.98 o
   9  11   7       12.76       72.71     75.40 o
 -23  12   7    10689.49    10398.18    343.94 o
 -20  12   7     3843.27     5071.58    221.26 o
 -17  12   7      117.64      146.60     65.49 o
 -14  12   7     9361.47    10165.30    304.31 o
 -11  12   7     1780.20     1001.90     94.21 o
  -8  12   7    90624.84    87021.35   2165.57 o
  -5  12   7       42.82      -26.79     38.35 o
  -2  12   7    21629.82    20664.03    647.74 o
   1  12   7    48678.30    53799.73   1224.71 o
   4  12   7    61498.29    65540.91   1751.12 o
   7  12   7       70.76       54.23     71.46 o
  10  12   7     3384.56     3595.65    228.25 o
 -25  13   7     9427.37     9080.24    365.66 o
 -22  13   7      877.10      932.03    128.34 o
 -19  13   7     4343.27     3891.03    201.22 o
 -16  13   7     1329.57     1394.90    118.04 o
 -13  13   7    30355.72    30250.26   1083.53 o
 -10  13   7     6927.52     6589.44    221.28 o
  -7  13   7    32027.75    33776.77    802.96 o
  -4  13   7     8096.22     7680.43    227.53 o
  -1  13   7      709.90     1142.24     91.28 o
   2  13   7   140374.19   136748.22   3649.93 o
   5  13   7    13385.39    17806.73    498.42 o
   8  13   7     9655.54    10069.98    330.05 o
  11  13   7     6408.79     5716.59    273.19 o
 -27  14   7      267.63      242.70    118.09 o
 -24  14   7    10407.41     9698.16    405.67 o
 -21  14   7    10411.55     9710.65    364.29 o
 -18  14   7      281.19      397.91     86.72 o
 -15  14   7    66693.72    67150.05   2381.40 o
 -12  14   7   143904.05   142493.63   4213.08 o
  -9  14   7     3016.81     3310.28    145.83 o
  -6  14   7       53.45       30.98     43.50 o
  -3  14   7    28268.74    31220.20    950.58 o
   0  14   7    69762.54    67927.52   1946.09 o
   3  14   7    27655.75    29901.50   1011.01 o
   6  14   7      296.86      215.97     84.38 o
   9  14   7     1329.93     1080.65    150.14 o
  12  14   7    10045.07     9689.84    430.68 o
 -29  15   7     8847.63     8196.33    520.35 o
 -26  15   7      940.44      724.16    146.59 o
 -23  15   7      108.73      241.71     91.63 o
 -20  15   7     1051.37     1341.47    139.12 o
 -17  15   7       42.78      150.46     65.31 o
 -14  15   7   151588.98   150838.89   4789.20 o
 -11  15   7    29744.89    28392.32    773.69 o
  -8  15   7     3695.73     3256.90    154.23 o
  -5  15   7    10552.20    11308.27    470.90 o
  -2  15   7     4347.01     4313.13    183.63 o
   1  15   7    69303.52    67327.05   1393.80 o
   4  15   7     8952.98     6784.33    363.36 o
   7  15   7       99.03      117.05     88.43 o
  10  15   7      879.29      793.35    153.32 o
  13  15   7       12.54       52.17     96.84 o
 -31  16   7     7732.19     7400.85    424.67 o
 -28  16   7    16216.97    15539.29    497.56 o
 -25  16   7     9075.20     8522.81    667.89 o
 -22  16   7      943.90      520.47    113.40 o
 -19  16   7      221.68      201.91     79.02 o
 -16  16   7    30452.19    32638.73    943.35 o
 -13  16   7   176895.45   183788.50   5635.37 o
 -10  16   7        4.32       21.24     48.42 o
  -7  16   7    11322.14    11814.04    394.33 o
  -4  16   7     1612.52     1299.42    132.86 o
  -1  16   7    65683.66    64841.45   2162.00 o
   2  16   7     7513.04     7417.52    366.42 o
   5  16   7      131.98       29.58     77.69 o
   8  16   7     5635.09     5872.43    304.54 o
  11  16   7      404.39      404.99    135.16 o
  14  16   7      577.23     1136.06    201.41 o
 -33  17   7     1771.04     2155.08    269.25 o
 -30  17   7    32761.42    29890.12   2068.09 o
 -27  17   7     5402.35     5275.08    318.96 o
 -24  17   7     3634.61     3434.09    236.92 o
 -21  17   7     3724.77     2736.38    206.23 o
 -18  17   7      350.82      423.90     95.23 o
 -15  17   7    30448.61    32361.60    883.68 o
 -12  17   7    16113.63    17643.17    507.67 o
  -9  17   7     3891.90     4622.53    174.82 o
  -6  17   7      764.85      553.94    109.80 o
  -3  17   7    11239.59    11549.65    534.68 o
   0  17   7     2234.66     3399.13    235.78 o
   3  17   7     5654.98     5048.89    284.79 o
   6  17   7    11646.52    11586.25    517.46 o
   9  17   7     2346.14     2090.45    221.41 o
  12  17   7       63.79       70.12    102.14 o
  15  17   7      507.13      530.57    160.46 o
 -35  18   7      440.75      525.53    163.71 o
 -32  18   7     8884.04     8952.23    470.56 o
 -29  18   7    23374.47    22692.92    902.84 o
 -26  18   7     1257.00     1228.60    175.36 o
 -23  18   7      232.53      281.10     97.82 o
 -20  18   7      686.50      450.39    106.29 o
 -17  18   7     5990.24     6096.90    232.73 o
 -14  18   7    13858.73    17454.22    503.83 o
 -11  18   7        0.45       75.17     57.73 o
  -8  18   7      634.12     1112.87    136.33 o
  -5  18   7     5486.10     5115.28    261.39 o
  -2  18   7    18833.11    20151.71    975.26 o
   1  18   7     2766.86     2562.94    221.44 o
   4  18   7      204.62      -39.47     75.07 o
   7  18   7    11546.87    11186.16    505.14 o
  10  18   7       99.98        4.42     92.14 o
  13  18   7      196.95      259.67    127.80 o
  16  18   7      821.41      885.58    188.23 o
 -37  19   7        5.21       32.27    111.09 o
 -34  19   7     1566.99     1671.33    247.52 o
 -31  19   7    18793.42    19260.65   1196.50 o
 -28  19   7     1955.33     2472.89    247.57 o
 -25  19   7     3782.11     3512.15    243.53 o
 -22  19   7     1758.92     1791.10    183.64 o
 -19  19   7     1727.07     1581.75    178.76 o
 -16  19   7     5102.08     5067.96    216.64 o
 -13  19   7      473.89      298.00     83.09 o
 -10  19   7     1145.04     1554.99    155.35 o
  -7  19   7     3309.82     3086.38    233.76 o
  -4  19   7    12568.61    12108.57    489.72 o
  -1  19   7       32.59      -21.07     68.67 o
   2  19   7     2786.76     3087.53    245.12 o
   5  19   7     1575.79     1295.56    184.11 o
   8  19   7     4133.66     4531.28    304.23 o
  11  19   7     1021.61     1286.11    214.69 o
  14  19   7      458.69      308.59    140.24 o
  17  19   7      393.95      294.62    141.61 o
 -36  20   7      632.45      670.67    178.06 o
 -33  20   7     2244.12     2490.25    290.88 o
 -30  20   7     5458.89     5201.78    335.14 o
 -27  20   7     1838.24     1748.93    207.30 o
 -24  20   7      120.08        8.54     73.51 o
 -21  20   7    17374.33    16010.74    805.32 o
 -18  20   7      150.74      477.49     98.75 o
 -15  20   7      178.83       80.95     73.08 o
 -12  20   7       52.76       -3.11     67.04 o
  -9  20   7     3048.42     2671.56    193.53 o
  -6  20   7    17491.10    17783.31    524.09 o
  -3  20   7     3313.48     3329.01    242.40 o
   0  20   7     4177.29     4229.45    276.05 o
   3  20   7     1738.73     1322.28    183.13 o
   6  20   7      391.40      531.75    136.74 o
   9  20   7     1720.23     1587.08    232.31 o
  12  20   7       46.95      158.81    119.06 o
  15  20   7     1029.77      906.40    198.11 o
  18  20   7      109.24       85.83    121.01 o
 -38  21   7      209.14      132.58    131.57 o
 -35  21   7     1141.05      970.95    203.62 o
 -32  21   7      779.27      794.99    185.98 o
 -29  21   7      355.94      294.60    121.19 o
 -26  21   7       71.18      107.94     87.87 o
 -23  21   7    10326.86     9415.96    344.87 o
 -20  21   7     5931.54     5430.11    325.59 o
 -17  21   7     1631.29     2643.65    185.07 o
 -14  21   7      625.60      669.32    131.50 o
 -11  21   7       35.00      131.12     80.82 o
  -8  21   7     5803.74     5690.69    283.04 o
  -5  21   7      651.75      826.09    145.75 o
  -2  21   7     3679.96     3039.95    259.25 o
   1  21   7       13.03       93.24     92.20 o
   4  21   7      796.80      986.26    165.91 o
   7  21   7     1604.57     1281.59    190.10 o
  10  21   7     2029.42     2284.51    270.31 o
  13  21   7      196.04      165.05    122.05 o
  16  21   7      477.32      464.07    161.77 o
 -37  22   7      685.17      796.79    211.42 o
 -34  22   7      108.76      104.27    108.42 o
 -31  22   7       64.26        5.59     84.46 o
 -28  22   7     4164.23     4382.05    306.07 o
 -25  22   7     2619.51     2339.24    217.09 o
 -22  22   7     9223.51     8724.48    392.33 o
 -19  22   7     3356.76     3317.26    229.04 o
 -16  22   7     4910.69     4069.37    272.13 o
 -13  22   7     2326.75     1973.77    193.68 o
 -10  22   7      118.27       49.60     73.17 o
  -7  22   7      446.25      251.41    100.83 o
  -4  22   7     9940.33     9818.08    503.35 o
  -1  22   7    10275.17     9845.43    381.27 o
   2  22   7     1622.14     2173.40    222.35 o
   5  22   7     1733.90     1726.83    216.98 o
   8  22   7     4676.64     4482.69    349.34 o
  11  22   7      402.93      337.19    135.98 o
  14  22   7     2692.05     3216.95    329.65 o
 -36  23   7      802.98      831.97    210.33 o
 -33  23   7       21.12        6.12     96.25 o
 -30  23   7      752.78      900.39    173.53 o
 -27  23   7     1323.44     1341.72    180.35 o
 -24  23   7    13624.26    14254.80    512.41 o
 -21  23   7      213.59      240.39    105.74 o
 -18  23   7       11.27       18.71     80.22 o
 -15  23   7     1355.49     2036.82    189.17 o
 -12  23   7     7546.28     7701.14    397.95 o
  -9  23   7     3422.75     3134.06    241.96 o
  -6  23   7     1459.61     1471.53    187.80 o
  -3  23   7    14526.69    14287.28    844.15 o
   0  23   7     5910.68     5131.73    347.83 o
   3  23   7     1306.79     1362.48    193.22 o
   6  23   7     1772.38     1581.75    232.39 o
   9  23   7      292.88      336.95    137.28 o
  12  23   7     1134.45     1200.37    217.71 o
 -35  24   7        1.09       14.53    112.52 o
 -32  24   7      322.52      192.88    120.84 o
 -29  24   7      701.36      724.84    172.11 o
 -26  24   7      441.72      605.82    158.98 o
 -23  24   7      193.92      328.39    115.10 o
 -20  24   7      475.55      209.73    112.39 o
 -17  24   7     7073.40     5883.14    310.95 o
 -14  24   7    12295.67    12149.64    552.05 o
 -11  24   7     9566.35     9613.44    511.39 o
  -8  24   7     9794.96     9004.17    515.39 o
  -5  24   7       60.55      230.71    105.34 o
  -2  24   7    15412.46    15039.70    722.01 o
   1  24   7       50.79       64.16     91.39 o
   4  24   7     3309.97     3519.70    285.61 o
   7  24   7        4.31      -36.51     89.36 o
  10  24   7        0.68      -56.92     92.01 o
  13  24   7        9.44      -47.79     94.44 o
 -37  25   7       48.82      -32.42    140.26 o
 -34  25   7       64.60       62.20    148.80 o
 -31  25   7        0.31      -33.78    110.14 o
 -28  25   7     4570.47     5218.10    335.56 o
 -25  25   7     1104.02     1649.10    230.01 o
 -22  25   7     1535.21     1104.61    191.85 o
 -19  25   7     3219.10     3514.58    265.74 o
 -16  25   7      232.94      519.12    128.28 o
 -13  25   7     3871.04     4846.97    315.73 o
 -10  25   7     2317.17     2642.22    270.87 o
  -7  25   7     5030.18     5567.68    330.88 o
  -4  25   7     1615.44     1573.24    199.77 o
  -1  25   7      169.35      243.78    108.96 o
   2  25   7     2235.39     2571.97    251.19 o
   5  25   7       46.26       15.65     94.26 o
   8  25   7      454.71      391.76    149.53 o
  11  25   7        7.55       -6.97     97.62 o
 -36  26   7      110.17       55.48    153.57 o
 -33  26   7      136.38        2.15    117.37 o
 -30  26   7      130.81       65.96    117.03 o
 -27  26   7      609.70      750.49    176.63 o
 -24  26   7     1275.31     1438.07    217.27 o
 -21  26   7      741.19      926.32    177.37 o
 -18  26   7    10240.56    11508.25    658.71 o
 -15  26   7      352.42      301.43    109.53 o
 -12  26   7      122.37       57.98     91.57 o
  -9  26   7        3.39      167.81    100.50 o
  -6  26   7     1973.55     1943.42    211.82 o
  -3  26   7      428.89      804.11    159.22 o
   0  26   7     2126.35     2038.31    231.40 o
   3  26   7      102.83      110.11     96.83 o
   6  26   7     3682.90     4386.20    362.46 o
   9  26   7      204.43      302.91    138.75 o
 -35  27   7      344.32      534.73    218.33 o
 -32  27   7      119.53      195.88    135.09 o
 -29  27   7      783.25      668.81    192.51 o
 -26  27   7      569.27      788.03    198.19 o
 -23  27   7     2499.69     2612.05    273.60 o
 -20  27   7     1843.11     1417.13    194.43 o
 -17  27   7      312.23      264.58    110.91 o
 -14  27   7       66.99      -85.02     85.02 o
 -11  27   7     8515.77     6869.47    336.21 o
  -8  27   7        5.97       26.14     82.62 o
  -5  27   7      652.24     1349.59    193.31 o
  -2  27   7     2092.06     1996.69    230.43 o
   1  27   7      162.03      149.48    102.60 o
   4  27   7     6384.41     6288.03    460.42 o
   7  27   7     2517.52     2115.82    278.62 o
 -34  28   7     1205.20     1007.07    233.35 o
 -31  28   7        3.34       37.85    133.86 o
 -28  28   7      132.59      152.12    152.31 o
 -25  28   7      448.25      567.96    173.62 o
 -22  28   7     1514.43     1706.25    266.25 o
 -19  28   7        0.87        7.04     79.83 o
 -16  28   7      803.55      882.43    178.34 o
 -13  28   7     4975.59     4789.29    381.14 o
 -10  28   7     9727.20    11136.95    596.33 o
  -7  28   7      142.28      137.12    101.02 o
  -4  28   7     2951.26     3854.18    295.82 o
  -1  28   7      869.40      992.46    180.26 o
   2  28   7     4922.14     4695.70    335.82 o
   5  28   7    10506.05    10966.59    570.92 o
   8  28   7       62.20       93.15    114.77 o
 -33  29   7      523.31      434.60    204.80 o
 -30  29   7      453.79      571.41    191.71 o
 -27  29   7      181.46      131.60    148.79 o
 -24  29   7      861.07      668.12    185.57 o
 -21  29   7     1172.40     1251.97    231.35 o
 -18  29   7      697.76      814.02    190.73 o
 -15  29   7      477.52      446.78    158.84 o
 -12  29   7    22355.43    23620.63   1540.76 o
  -9  29   7      883.44      820.21    161.54 o
  -6  29   7      722.38      499.54    133.49 o
  -3  29   7      657.87      894.76    168.33 o
   0  29   7      118.56       89.15    102.69 o
   3  29   7    11385.49    11592.98    583.71 o
   6  29   7     1128.47     1230.51    222.55 o
 -35  30   7      699.27      862.36    262.43 o
 -32  30   7       38.42      188.51    159.91 o
 -29  30   7     5326.15     4867.39    483.60 o
 -26  30   7     4156.56     3911.48    376.96 o
 -23  30   7     1837.09     1195.38    232.91 o
 -20  30   7     1917.49     1291.21    234.03 o
 -17  30   7     1088.29     1339.69    235.87 o
 -14  30   7    12457.83    11225.34   2562.20 o
 -11  30   7    27078.06    26734.06   1621.37 o
  -8  30   7      231.13       92.84     99.84 o
  -5  30   7       30.87      114.65     98.70 o
  -2  30   7      923.83      986.59    180.93 o
   1  30   7     1347.64     1278.22    206.65 o
   4  30   7     3008.99     2853.82    317.59 o
 -34  31   7       86.77       75.21    153.61 o
 -31  31   7        3.34        6.62    116.11 o
 -28  31   7    13995.06    12474.70   1302.41 o
 -25  31   7     1849.84     1392.55    259.43 o
 -22  31   7     1059.35     1136.05    226.17 o
 -19  31   7      109.49      108.94    117.69 o
 -16  31   7      525.08      700.46    225.91 o
 -13  31   7    20980.94    18397.38   1238.21 o
 -10  31   7     2520.50     2436.36    309.87 o
  -7  31   7      100.83       66.60     91.47 o
  -4  31   7      189.21      179.74    110.83 o
  -1  31   7       20.19      123.36    102.06 o
   2  31   7     2726.18     3281.38    356.06 o
 -33  32   7        3.20      -62.87    129.47 o
 -30  32   7     4483.11     4523.94    479.61 o
 -27  32   7    11193.80    10818.40    890.36 o
 -24  32   7      174.98      213.08    142.55 o
 -21  32   7      219.22      218.62    155.40 o
 -18  32   7       23.31      -85.85    104.38 o
 -15  32   7     4440.65     4487.31    390.31 o
 -12  32   7     4731.13     4615.18    405.34 o
  -9  32   7       10.32      -18.14    101.72 o
  -6  32   7      223.01      537.56    161.30 o
  -3  32   7       19.66       70.61    105.25 o
   0  32   7       89.04       31.12    116.23 o
 -32  33   7      672.71      651.94    199.14 o
 -29  33   7     9825.42     9614.10    880.37 o
 -26  33   7     1518.31     1334.69    255.67 o
 -23  33   7      464.34      678.31    222.48 o
 -20  33   7       25.38      -13.00    101.58 o
 -17  33   7      709.96      404.92    188.33 o
 -14  33   7     2658.39     2779.10    324.89 o
 -11  33   7      126.34      175.22    130.68 o
  -8  33   7       51.71       98.07    129.17 o
  -5  33   7      343.50      326.40    142.52 o
  -2  33   7       15.04      -18.67     98.88 o
 -31  34   7     1869.30     2064.83    315.31 o
 -28  34   7     3944.22     4083.37    724.32 o
 -25  34   7      371.88      373.34    182.47 o
 -22  34   7      154.48      203.75    197.58 o
 -19  34   7     1120.26     1174.28    279.11 o
 -16  34   7     1581.63      977.38    222.24 o
 -13  34   7      842.35      655.16    194.45 o
 -10  34   7       50.47        7.91    109.26 o
  -7  34   7     1133.20     1349.29    259.33 o
  -4  34   7      421.40      361.70    146.12 o
 -30  35   7     2186.76     2464.46    340.46 o
 -27  35   7        7.96        2.91    151.21 o
 -24  35   7      104.45       31.22    154.53 o
 -21  35   7     2609.92     3552.01    435.73 o
 -18  35   7      508.03      471.74    176.70 o
 -15  35   7      140.40      199.89    159.24 o
 -12  35   7      173.33      239.66    143.79 o
  -9  35   7       85.03       57.92    122.29 o
  -6  35   7      889.13      825.92    220.42 o
 -26  36   7       40.73        0.60    162.72 o
 -23  36   7      310.40      232.30    211.96 o
 -20  36   7     2364.60     2687.59    341.32 o
 -17  36   7       80.23       -5.49    109.05 o
 -14  36   7      720.32      904.64    215.72 o
 -11  36   7       17.85       -3.32    110.18 o
  -8  36   7      192.73      124.33    136.18 o
 -25  37   7        6.80       61.76    169.28 o
 -22  37   7      540.55      415.46    196.88 o
 -19  37   7      533.02      499.54    182.07 o
 -16  37   7     1222.30     1549.58    272.29 o
 -13  37   7       78.71      158.97    133.30 o
 -21  38   7      327.81      423.18    177.83 o
 -18  38   7       11.65       65.76    129.12 o
   0   1   8    21594.11    22127.89    281.73 o
  -2   2   8    99623.52   101745.21   1171.40 o
   1   2   8     2869.51     5446.09    145.95 o
  -4   3   8     9865.03     8010.54    177.08 o
  -1   3   8     8178.89     7118.62    161.63 o
   2   3   8     5395.34     2465.96    114.48 o
  -6   4   8    18819.32    21280.35    432.66 o
  -3   4   8    19089.83    12006.83    207.94 o
   0   4   8    10005.92    12985.38    331.70 o
   3   4   8    43539.69    44460.51   1159.96 o
  -8   5   8     2322.18     4641.39    178.86 o
  -5   5   8     2374.22     2658.81    114.30 o
  -2   5   8      211.88      -22.01     43.84 o
   1   5   8    24122.80    21617.09    474.11 o
   4   5   8     5549.18     3522.96    168.59 o
 -10   6   8     7972.47    11943.47    367.29 o
  -7   6   8     8588.13     7410.90    193.47 o
  -4   6   8      302.90      518.41     60.01 o
  -1   6   8     1522.74     2653.04    133.48 o
   2   6   8    56250.41    58653.41   1848.70 o
   5   6   8    11666.21    13454.94    446.71 o
 -12   7   8    34444.76    34339.93    881.11 o
  -9   7   8     4255.71     3668.98    141.66 o
  -6   7   8    17758.40    13217.22    274.07 o
  -3   7   8    13818.75    16972.36    359.21 o
   0   7   8     1095.78     1636.41    114.83 o
   3   7   8    42375.69    39831.64   1413.79 o
   6   7   8    58079.63    61492.66   1862.61 o
 -14   8   8    31387.67    33934.04    905.17 o
 -11   8   8     6957.32     5724.37    171.88 o
  -8   8   8    25183.49    19664.60    697.42 o
  -5   8   8     5919.86     7018.73    203.91 o
  -2   8   8    57946.78    62275.20   1945.64 o
   1   8   8     8852.24    13360.59    418.29 o
   4   8   8     3107.68     2503.39    110.08 o
   7   8   8    14851.75    14763.44    441.14 o
 -16   9   8     3896.46     4020.23    188.18 o
 -13   9   8    16794.49    17770.29    673.77 o
 -10   9   8     5521.09     6784.12    186.27 o
  -7   9   8     2132.65     1877.09    105.31 o
  -4   9   8   161945.97   171343.64   5052.01 o
  -1   9   8    15005.04    13412.37    508.54 o
   2   9   8    10447.13    10535.79    373.60 o
   5   9   8    10973.89     8540.69    259.86 o
   8   9   8     2416.17     2758.75    169.71 o
 -18  10   8     4934.63     5623.79    221.05 o
 -15  10   8     6324.00     5136.60    198.71 o
 -12  10   8     1757.71     2067.15    125.26 o
  -9  10   8     3972.93     4844.61    158.96 o
  -6  10   8    79182.65    76499.25   2683.22 o
  -3  10   8   133160.27   135440.97   4820.92 o
   0  10   8     3749.34     3539.74    154.32 o
   3  10   8      473.15      561.90     85.69 o
   6  10   8      664.39      691.31    100.91 o
   9  10   8     2074.30     2141.40    162.01 o
 -20  11   8    35639.29    36050.54   1261.99 o
 -17  11   8      890.75     1215.59    127.48 o
 -14  11   8     7956.33     7901.45    286.60 o
 -11  11   8     3719.77     2815.89    139.29 o
  -8  11   8      784.18      799.22     84.11 o
  -5  11   8    87544.83    86530.80   2799.49 o
  -2  11   8      601.66      721.31     90.69 o
   1  11   8     9664.60     9683.16    292.74 o
   4  11   8    18589.44    22903.89    721.39 o
   7  11   8       36.28      361.08     82.02 o
  10  11   8     7957.56     9751.01    390.69 o
 -22  12   8     9472.31    10411.14    491.80 o
 -19  12   8    15375.26    12243.04    438.27 o
 -16  12   8     6844.80     5263.05    207.52 o
 -13  12   8     9832.26     8216.95    362.61 o
 -10  12   8     1423.50      707.88     84.73 o
  -7  12   8      715.70      739.91     77.43 o
  -4  12   8    68928.42    73554.48   2313.65 o
  -1  12   8     1311.54     1364.84    136.78 o
   2  12   8    88038.45    89118.47   3043.67 o
   5  12   8     5719.16     4486.49    199.28 o
   8  12   8      445.19      225.03    105.92 o
  11  12   8      583.41      224.40    105.74 o
 -24  13   8      443.57      403.83    118.13 o
 -21  13   8    29960.01    32860.79    997.46 o
 -18  13   8     3830.88     3887.82    204.94 o
 -15  13   8     3544.56     2391.78    145.15 o
 -12  13   8    24617.43    26015.17    774.03 o
  -9  13   8    27656.97    30798.73   1003.48 o
  -6  13   8     7471.20     8596.03    256.18 o
  -3  13   8     2311.85     1773.73    131.12 o
   0  13   8     6444.38     6196.92    231.90 o
   3  13   8    50900.30    50193.42   1682.65 o
   6  13   8       37.15       47.74     78.60 o
   9  13   8     3110.14     3698.24    281.84 o
  12  13   8     2339.26     2592.03    265.30 o
 -26  14   8      360.77      276.84    121.56 o
 -23  14   8     6395.21     6866.77    394.40 o
 -20  14   8    22969.54    22353.12    760.92 o
 -17  14   8      667.18      500.89     94.79 o
 -14  14   8    26936.30    27533.53    784.33 o
 -11  14   8    23023.36    21600.61    787.03 o
  -8  14   8       73.27      135.90     53.38 o
  -5  14   8      185.67      249.58     71.21 o
  -2  14   8     2842.52     3855.98    188.63 o
   1  14   8    55328.84    58269.30   2094.24 o
   4  14   8     8217.33     7535.61    358.42 o
   7  14   8      508.62      985.19    154.84 o
  10  14   8     1188.32     1371.97    182.55 o
  13  14   8     1016.84     1378.39    206.63 o
 -28  15   8     1599.21     1638.67    229.23 o
 -25  15   8      298.25      322.28    123.18 o
 -22  15   8    19536.73    20283.83    694.03 o
 -19  15   8     7699.56     6927.58    252.41 o
 -16  15   8     8400.73     8861.54    313.08 o
 -13  15   8    99682.59   101792.73   3073.23 o
 -10  15   8        9.76       60.30     51.39 o
  -7  15   8      772.06     1626.87    131.35 o
  -4  15   8      540.03      781.39    113.52 o
  -1  15   8    18053.71    17212.11    656.59 o
   2  15   8    10084.74    10456.23    444.31 o
   5  15   8       15.11       47.18     79.18 o
   8  15   8      219.31      178.51     98.99 o
  11  15   8       57.86      188.55    104.40 o
  14  15   8       13.21      -39.02     83.91 o
 -30  16   8     3753.22     4082.38    338.65 o
 -27  16   8     4128.42     4086.14    320.80 o
 -24  16   8       49.40       48.76     84.64 o
 -21  16   8     2488.30     2408.99    183.50 o
 -18  16   8     5766.63     5775.14    231.31 o
 -15  16   8    10890.40    11269.19    320.73 o
 -12  16   8    40490.63    39328.32   1200.51 o
  -9  16   8       18.32        5.15     56.41 o
  -6  16   8     1746.37     2108.84    148.85 o
  -3  16   8       56.15      -56.65     62.71 o
   0  16   8    12287.33    11919.06    516.33 o
   3  16   8     8533.95    11306.10    383.72 o
   6  16   8      133.04      103.13     86.19 o
   9  16   8     2030.47     2613.76    239.23 o
  12  16   8        7.86      -10.02     90.75 o
  15  16   8       40.68       23.33     99.31 o
 -32  17   8     1941.60     1498.42    232.79 o
 -29  17   8    16855.97    16637.88    577.50 o
 -26  17   8     1254.89     1138.58    174.56 o
 -23  17   8      111.65       72.21     78.94 o
 -20  17   8     3952.24     4728.39    233.50 o
 -17  17   8     5208.50     6382.39    245.78 o
 -14  17   8    16001.68    16056.83    517.62 o
 -11  17   8      409.80      221.76     75.83 o
  -8  17   8      215.37      169.20     70.67 o
  -5  17   8      739.71      729.08    130.92 o
  -2  17   8     4528.00     3634.25    257.69 o
   1  17   8    15273.87    16277.08    755.90 o
   4  17   8       79.74       34.57     78.91 o
   7  17   8     2689.90     3946.80    277.90 o
  10  17   8      982.03     1131.77    194.31 o
  13  17   8      477.51      416.97    141.42 o
  16  17   8      151.65      212.73    126.28 o
 -34  18   8      285.10      331.83    146.88 o
 -31  18   8    10158.47     9473.88    502.93 o
 -28  18   8     5384.39     4704.95    345.69 o
 -25  18   8      291.42      268.02    107.27 o
 -22  18   8      617.65      425.15    108.30 o
 -19  18   8        1.70       69.08     68.69 o
 -16  18   8    12922.75    13360.60    483.04 o
 -13  18   8     2820.86     2188.81    165.59 o
 -10  18   8      983.92      714.42    107.43 o
  -7  18   8     1592.91     1736.63    159.46 o
  -4  18   8      871.16      923.43    145.64 o
  -1  18   8     1507.48     2286.84    208.71 o
   2  18   8       19.51       28.18     77.31 o
   5  18   8      180.19      214.09    104.78 o
   8  18   8      762.09      855.57    160.62 o
  11  18   8     3175.87     2956.04    292.69 o
  14  18   8       30.37      -33.22     91.89 o
  17  18   8      277.16      244.99    136.54 o
 -36  19   8       36.51      -24.48    106.16 o
 -33  19   8     1402.99     1383.27    230.40 o
 -30  19   8     8799.48     8123.85    422.16 o
 -27  19   8        1.47      -45.69     73.10 o
 -24  19   8        4.61       19.46     75.42 o
 -21  19   8        3.70      -22.68     63.34 o
 -18  19   8     2157.47     2478.67    196.42 o
 -15  19   8       34.91       68.40     70.64 o
 -12  19   8      484.32      248.91     82.74 o
  -9  19   8      517.53      420.36    100.58 o
  -6  19   8     2686.78     3289.83    236.15 o
  -3  19   8     2884.97     2323.22    212.71 o
   0  19   8      914.32     1101.11    163.42 o
   3  19   8     4913.79     5886.94    314.65 o
   6  19   8      427.92      469.25    131.09 o
   9  19   8     2236.34     2670.87    280.47 o
  12  19   8       14.02       38.43     95.31 o
  15  19   8      930.21      773.12    185.10 o
  18  19   8       76.35        7.72    108.19 o
 -35  20   8       73.80      159.84    129.00 o
 -32  20   8     1792.20     1834.93    248.94 o
 -29  20   8      369.85      355.50    142.01 o
 -26  20   8      911.54     1058.58    170.49 o
 -23  20   8     1488.60     1643.54    181.78 o
 -20  20   8     2058.76     1885.10    201.01 o
 -17  20   8     5431.60     4946.89    230.52 o
 -14  20   8    18831.92    18210.58    706.63 o
 -11  20   8      477.11      828.10    132.28 o
  -8  20   8     3219.11     3312.09    257.58 o
  -5  20   8      683.19      568.69    124.50 o
  -2  20   8     2010.35     1966.84    205.28 o
   1  20   8      497.55      555.02    133.40 o
   4  20   8     8984.78     8908.46    476.08 o
   7  20   8     1255.83     1634.01    206.60 o
  10  20   8     7014.17     6703.16    403.98 o
  13  20   8       72.25      140.95    109.93 o
  16  20   8     1609.95     1658.55    257.19 o
 -37  21   8       57.88       -1.33    109.53 o
 -34  21   8      108.90       96.76    111.26 o
 -31  21   8      921.97      958.91    197.46 o
 -28  21   8     3072.20     2629.94    251.71 o
 -25  21   8     1802.26     1664.55    190.68 o
 -22  21   8     5759.23     5492.25    310.15 o
 -19  21   8      161.63      146.78     94.27 o
 -16  21   8     2963.34     2950.98    195.98 o
 -13  21   8    16749.15    17946.55    811.15 o
 -10  21   8       76.52       28.10     71.29 o
  -7  21   8      412.67      352.97    105.59 o
  -4  21   8    13343.94    14662.74    796.62 o
  -1  21   8    17764.73    18761.25    754.69 o
   2  21   8     1764.43     1798.29    214.18 o
   5  21   8     2018.99     1793.40    219.31 o
   8  21   8    11624.45    12305.04   1053.60 o
  11  21   8      610.31      490.96    155.23 o
  14  21   8     2828.64     2707.46    304.64 o
 -36  22   8      530.38      792.05    218.61 o
 -33  22   8       31.50      -23.12    115.65 o
 -30  22   8      294.72      133.70    113.43 o
 -27  22   8     5173.63     5299.14    330.20 o
 -24  22   8     2073.80     2268.83    233.48 o
 -21  22   8      893.98      961.30    164.87 o
 -18  22   8      280.32      178.48     84.31 o
 -15  22   8     1581.51     1713.72    178.18 o
 -12  22   8     4274.98     4145.95    302.52 o
  -9  22   8     2366.30     2553.16    222.70 o
  -6  22   8     8976.36     9607.67    377.22 o
  -3  22   8     6602.90     7115.38    347.79 o
   0  22   8    11136.69    11973.62    428.61 o
   3  22   8     2866.90     2631.57    248.32 o
   6  22   8     7729.58     7377.77    419.05 o
   9  22   8     5367.74     5895.73    466.25 o
  12  22   8      278.37      277.28    127.53 o
  15  22   8     1299.77     1356.91    236.53 o
 -35  23   8       16.98      -14.38    124.78 o
 -32  23   8      238.34       73.14    125.08 o
 -29  23   8     1251.90     1239.86    208.36 o
 -26  23   8     4592.50     4530.48    309.15 o
 -23  23   8      422.46      492.32    128.50 o
 -20  23   8      234.28       87.94     83.86 o
 -17  23   8     1996.24     2415.09    226.57 o
 -14  23   8     8684.14     9304.44    411.76 o
 -11  23   8    12624.27    13809.26    607.17 o
  -8  23   8    32141.74    32544.38   1441.43 o
  -5  23   8     2036.94     1897.01    210.95 o
  -2  23   8    23056.85    22904.90    791.20 o
   1  23   8     1812.62     2028.43    224.54 o
   4  23   8     2867.22     2533.71    254.26 o
   7  23   8     6026.72     6042.18    395.76 o
  10  23   8      759.61      875.51    192.36 o
  13  23   8     1968.39     2442.07    301.05 o
 -37  24   8      175.81       61.46    151.96 o
 -34  24   8       22.95       49.59    133.33 o
 -31  24   8        4.28       54.81    107.80 o
 -28  24   8     8937.48    10214.55    423.75 o
 -25  24   8     2259.03     2209.60    235.77 o
 -22  24   8     1081.73      962.98    163.66 o
 -19  24   8     4648.79     4402.75    321.54 o
 -16  24   8     2818.05     3649.34    266.04 o
 -13  24   8    16368.89    17178.38    488.88 o
 -10  24   8    16448.89    17394.65    897.46 o
  -7  24   8    14905.33    16405.73    964.16 o
  -4  24   8     6516.39     6859.88    409.01 o
  -1  24   8    23783.09    24697.80   1002.69 o
   2  24   8      102.07       56.87     93.27 o
   5  24   8     1976.00     2337.55    246.87 o
   8  24   8        5.86      106.06    110.05 o
  11  24   8      342.11      416.02    153.81 o
 -36  25   8      175.32      197.21    165.78 o
 -33  25   8      540.14      372.48    195.42 o
 -30  25   8      315.22      142.00    113.73 o
 -27  25   8     9687.45     9962.00    418.62 o
 -24  25   8     3843.78     3540.42    308.04 o
 -21  25   8        4.62       94.88    100.81 o
 -18  25   8    17979.72    17374.02    587.07 o
 -15  25   8       17.94       40.86     78.33 o
 -12  25   8    13511.47    13285.84    653.82 o
  -9  25   8     7871.53     8565.03    422.09 o
  -6  25   8     1008.14     1248.02    182.24 o
  -3  25   8    19139.44    18936.61    984.41 o
   0  25   8     2874.35     2523.55    251.80 o
   3  25   8      203.98      152.41     98.64 o
   6  25   8      906.32     1024.18    202.44 o
   9  25   8        7.17      -78.74     84.80 o
 -35  26   8      182.53      151.05    163.81 o
 -32  26   8      217.33      204.15    144.75 o
 -29  26   8     2633.43     2117.54    249.48 o
 -26  26   8     7059.77     7344.74    406.40 o
 -23  26   8     1046.15     1045.37    194.37 o
 -20  26   8     7109.71     6695.61    374.41 o
 -17  26   8     9420.07     8383.59    361.31 o
 -14  26   8     1869.19     1632.88    199.94 o
 -11  26   8       32.87      -12.30     76.86 o
  -8  26   8      407.64      295.11    111.28 o
  -5  26   8     1310.45     1016.25    175.38 o
  -2  26   8     2810.29     2816.90    256.20 o
   1  26   8        0.40       -4.04     85.31 o
   4  26   8     1274.87     1542.31    217.41 o
   7  26   8     2576.34     2300.94    279.34 o
  10  26   8      159.57       90.30    121.53 o
 -34  27   8      658.45      647.45    232.37 o
 -31  27   8      360.86      758.22    204.63 o
 -28  27   8      565.61      280.25    153.38 o
 -25  27   8     1613.05     1280.57    216.01 o
 -22  27   8      471.09      552.91    151.17 o
 -19  27   8    11059.36    10538.16    413.31 o
 -16  27   8     1180.27     1259.28    201.39 o
 -13  27   8        1.28      -37.29     77.28 o
 -10  27   8     4383.86     4993.08    315.50 o
  -7  27   8        0.84       -2.72     77.16 o
  -4  27   8       96.97      117.42     96.30 o
  -1  27   8       57.27       -3.37     85.32 o
   2  27   8     1200.16     1455.32    215.32 o
   5  27   8     7790.95     8749.03    616.00 o
   8  27   8        2.98       -2.57    102.05 o
 -33  28   8     1536.41     1644.78    326.99 o
 -30  28   8      426.59      615.13    221.31 o
 -27  28   8       98.40       85.72    117.08 o
 -24  28   8      216.72      226.79    123.03 o
 -21  28   8     3297.34     3700.77    315.81 o
 -18  28   8     1936.62     1910.89    245.73 o
 -15  28   8      382.39      481.91    145.50 o
 -12  28   8     9847.49     8920.89    550.83 o
  -9  28   8     1759.08     1693.58    214.52 o
  -6  28   8      213.06      375.77    124.60 o
  -3  28   8      505.84      551.01    138.24 o
   0  28   8       39.68       28.88     85.27 o
   3  28   8     9840.20    10912.17    549.35 o
   6  28   8     3339.24     4015.44    360.07 o
 -35  29   8     2740.32     2739.42    500.85 o
 -32  29   8      206.94      433.12    202.53 o
 -29  29   8       21.68       78.86    118.05 o
 -26  29   8      813.46      940.42    220.45 o
 -23  29   8       78.58      -85.22     96.77 o
 -20  29   8      494.42     1002.91    190.29 o
 -17  29   8       14.30      -57.58     94.33 o
 -14  29   8     1972.23     1941.05    251.33 o
 -11  29   8    15048.82    14024.52    623.24 o
  -8  29   8       58.06       23.09     79.39 o
  -5  29   8       20.95      -26.74     78.35 o
  -2  29   8      101.61      249.52    115.82 o
   1  29   8     1019.64     1123.15    191.10 o
   4  29   8     8407.12     9018.13    474.48 o
 -34  30   8      615.61      586.74    225.11 o
 -31  30   8       50.07       -8.50    126.83 o
 -28  30   8     3997.75     3888.67    383.11 o
 -25  30   8     1802.43     1555.31    264.27 o
 -22  30   8       85.17      140.25    130.51 o
 -19  30   8      374.53      378.62    159.35 o
 -16  30   8        8.16        7.06     95.24 o
 -13  30   8    21405.25    20601.64   1525.77 o
 -10  30   8     4034.52     3286.80    350.42 o
  -7  30   8        2.46      -20.88     79.99 o
  -4  30   8      171.34       58.56     99.08 o
  -1  30   8       38.90       21.96     91.10 o
   2  30   8     3545.97     3989.81    357.66 o
 -33  31   8       11.58      104.49    150.77 o
 -30  31   8     1016.06      968.19    228.80 o
 -27  31   8     8135.90     7550.48    487.76 o
 -24  31   8      401.67      566.41    183.00 o
 -21  31   8      823.74      751.57    230.74 o
 -18  31   8        5.04      -18.10     99.68 o
 -15  31   8     4432.53     4660.07    396.54 o
 -12  31   8    19636.30    19604.72    835.14 o
  -9  31   8        2.81      -20.39     76.19 o
  -6  31   8      283.58      380.24    130.69 o
  -3  31   8       10.12       35.02     93.99 o
   0  31   8       42.99      -37.02     87.57 o
 -32  32   8        7.09      -33.26    130.19 o
 -29  32   8     7569.83     8000.62    503.74 o
 -26  32   8     3749.04     3222.23    360.45 o
 -23  32   8       52.25       -6.46    119.55 o
 -20  32   8     1222.60     1001.79    254.48 o
 -17  32   8      210.57      187.28    136.26 o
 -14  32   8     4228.83     4181.67    441.13 o
 -11  32   8      875.13     1087.11    225.09 o
  -8  32   8       77.53       82.97    101.63 o
  -5  32   8      265.77      189.17    113.73 o
  -2  32   8      134.52       79.64    102.57 o
   1  32   8      198.81      232.20    129.65 o
 -31  33   8      330.56      156.16    149.94 o
 -28  33   8     7707.92     8524.11    622.52 o
 -25  33   8        5.90       40.14    128.00 o
 -22  33   8       19.12       26.73    131.07 o
 -19  33   8      594.09      584.51    185.10 o
 -16  33   8       34.32       15.31    111.06 o
 -13  33   8       19.59       97.55    118.34 o
 -10  33   8     1014.73      835.23    205.28 o
  -7  33   8       34.61      -83.60     85.85 o
  -4  33   8       37.77       79.97    113.76 o
  -1  33   8       45.43      -48.36    104.84 o
 -30  34   8     1283.38     1265.13    262.90 o
 -27  34   8      105.17       97.12    157.07 o
 -24  34   8      199.80      213.69    164.92 o
 -21  34   8      563.19      469.24    199.80 o
 -18  34   8       42.97      -18.38    109.97 o
 -15  34   8       84.89       40.62    111.44 o
 -12  34   8      579.46      589.02    178.19 o
  -9  34   8      122.24       62.94    121.19 o
  -6  34   8      590.97      610.52    173.76 o
 -29  35   8       72.24      -19.33    135.83 o
 -26  35   8      826.25     1189.69    289.29 o
 -23  35   8      125.95       48.35    133.76 o
 -20  35   8      928.62     1001.72    228.08 o
 -17  35   8       24.72        7.23    110.27 o
 -14  35   8      148.07       67.65    148.11 o
 -11  35   8      768.34      522.66    178.62 o
  -8  35   8      178.53       -9.92    110.64 o
 -25  36   8      211.57      132.37    148.62 o
 -22  36   8       95.04       59.37    146.99 o
 -19  36   8      728.99      700.86    200.21 o
 -16  36   8        6.93       22.18    116.08 o
 -13  36   8       11.41       62.82    125.59 o
 -10  36   8       26.55      -80.21    108.04 o
 -24  37   8       26.47       43.09    138.13 o
 -21  37   8        3.79       79.80    146.32 o
 -18  37   8        4.73     -110.20    110.20 o
 -15  37   8      780.10      587.56    193.44 o
   0   0   9    66782.33    70934.30   2644.36 o
   1   1   9     2464.90     2144.06    109.85 o
  -1   2   9    23441.00    26143.49    362.94 o
   2   2   9    13265.97    17257.63    302.79 o
  -3   3   9     1251.80     1209.13     89.98 o
   0   3   9       27.93        6.69     40.90 o
   3   3   9    66100.27    67527.65   1300.53 o
  -5   4   9    30106.27    23555.17    655.59 o
  -2   4   9     5603.84     5091.57    144.83 o
   1   4   9    64971.19    77826.03   1693.17 o
   4   4   9    22243.21    26518.46    559.91 o
  -7   5   9       51.56       13.49     40.65 o
  -4   5   9    23543.99    21631.05    530.00 o
  -1   5   9     3080.45     2857.78    143.01 o
   2   5   9    10954.43    14690.74    290.67 o
   5   5   9    13467.07    12813.65    449.91 o
  -9   6   9      493.41      275.39     59.94 o
  -6   6   9     3661.95     5172.58    155.66 o
  -3   6   9     6693.63     6813.63    200.60 o
   0   6   9    36039.44    38128.62   1084.45 o
   3   6   9      231.82      183.71     51.57 o
   6   6   9    22050.64    19936.93    655.17 o
 -11   7   9     1912.20      950.29     93.21 o
  -8   7   9     5709.09     7269.85    194.92 o
  -5   7   9      653.47     1186.93     94.13 o
  -2   7   9     3641.78     2540.54    141.69 o
   1   7   9        2.32       27.42     47.75 o
   4   7   9     3948.44     2964.25    141.05 o
   7   7   9    25737.03    25807.69    631.50 o
 -13   8   9      738.82      691.58     86.97 o
 -10   8   9     1801.09     2224.58    125.69 o
  -7   8   9       31.34      379.34     63.97 o
  -4   8   9    66644.60    60831.60   1536.91 o
  -1   8   9    26144.80    27635.21    645.13 o
   2   8   9     7481.02     9012.92    350.31 o
   5   8   9    10110.96    13343.68    446.56 o
   8   8   9     3784.61     4126.73    203.02 o
 -15   9   9     1817.38     2338.39    158.39 o
 -12   9   9      916.44      637.68     83.76 o
  -9   9   9     6303.09     6214.23    180.56 o
  -6   9   9    35466.61    36567.86   1260.42 o
  -3   9   9   255413.59   262783.84   7536.93 o
   0   9   9     9250.23    10288.24    414.99 o
   3   9   9       51.93       26.43     48.44 o
   6   9   9    13030.61    15100.47    488.54 o
   9   9   9     1806.36     1647.62    147.31 o
 -17  10   9      137.72       84.02     65.13 o
 -14  10   9    11306.13    10781.25    351.71 o
 -11  10   9    17204.11    15927.47    544.70 o
  -8  10   9     1877.59     2406.79    160.04 o
  -5  10   9   283622.53   282700.06  14147.12 o
  -2  10   9   126606.78   131729.67   4343.75 o
   1  10   9      787.95      555.91     82.39 o
   4  10   9     3511.91     3181.98    193.20 o
   7  10   9       33.83      -23.46     59.48 o
  10  10   9    18280.36    16574.23    688.99 o
 -19  11   9    57764.68    56105.48   2236.68 o
 -16  11   9     2717.16     3536.83    192.21 o
 -13  11   9     9487.14     9236.98    313.12 o
 -10  11   9     1763.50     1365.84    108.92 o
  -7  11   9    56352.41    61399.55   1741.91 o
  -4  11   9   356736.56   311919.81  21422.73 o
  -1  11   9     2595.08     2953.59    156.61 o
   2  11   9     2399.62     2946.58    185.65 o
   5  11   9     1272.40     1029.18    133.36 o
   8  11   9      758.67      993.59    152.95 o
  11  11   9    17627.10    17614.11   1033.60 o
 -21  12   9    62623.58    61679.65   2904.68 o
 -18  12   9    27169.19    32276.26   1193.37 o
 -15  12   9     5549.76     5636.42    214.56 o
 -12  12   9     1098.59     1573.19    122.04 o
  -9  12   9       64.77       74.93     47.29 o
  -6  12   9   162762.39   162562.44   4822.19 o
  -3  12   9    66525.34    63107.34   2866.67 o
   0  12   9      593.83      345.51     87.32 o
   3  12   9    29356.67    29972.27   1267.41 o
   6  12   9     2817.43     3066.17    226.82 o
   9  12   9      117.52      156.69     90.67 o
  12  12   9     5788.38     6942.34    355.36 o
 -23  13   9    15898.22    15580.09    743.91 o
 -20  13   9    53116.82    60056.58   1518.71 o
 -17  13   9     1407.14     1456.62    140.61 o
 -14  13   9      242.53       99.53     57.46 o
 -11  13   9     6810.55     6921.00    209.61 o
  -8  13   9     4472.32     4026.44    184.72 o
  -5  13   9    89102.40    93810.20   3640.83 o
  -2  13   9       94.07      367.89     79.86 o
   1  13   9    13369.52    13956.88    591.40 o
   4  13   9     3821.28     3292.84    321.08 o
   7  13   9      817.92      776.35    155.81 o
  10  13   9      606.83      556.94    134.79 o
  13  13   9     2609.51     2684.65    327.96 o
 -25  14   9     2345.36     2521.89    484.89 o
 -22  14   9    68402.41    67714.45   2405.54 o
 -19  14   9     4149.96     5693.52    364.20 o
 -16  14   9     5777.08     4647.47    230.92 o
 -13  14   9     2428.14     2508.00    150.82 o
 -10  14   9      422.71      386.69     84.92 o
  -7  14   9    10550.83    12673.74    429.61 o
  -4  14   9     7816.23     6195.82    215.70 o
  -1  14   9     5452.29     4606.16    224.91 o
   2  14   9     2458.20     3022.96    223.91 o
   5  14   9      714.23     1099.10    162.88 o
   8  14   9      962.49      683.29    143.11 o
  11  14   9        7.80       46.02     85.15 o
  14  14   9       84.98      250.84    121.59 o
 -27  15   9     1752.11     1607.77    230.63 o
 -24  15   9     8854.17     8439.60    392.14 o
 -21  15   9    28389.65    27275.85   1001.15 o
 -18  15   9       24.71       44.61     66.03 o
 -15  15   9     4571.06     4158.22    245.21 o
 -12  15   9     6367.61     6995.94    240.10 o
  -9  15   9      984.42      724.03    106.59 o
  -6  15   9    12453.00    14075.13    547.87 o
  -3  15   9    16328.10    14869.65    539.80 o
   0  15   9      926.46     1244.14    160.72 o
   3  15   9     5832.25     5497.07    280.80 o
   6  15   9     5796.40     4990.12    290.52 o
   9  15   9      109.20        6.04     83.08 o
  12  15   9       45.88       77.21    100.00 o
  15  15   9      895.64      827.54    180.74 o
 -29  16   9     1695.83     1705.58    237.98 o
 -26  16   9     3652.74     3153.91    286.88 o
 -23  16   9     7311.32     6834.27    296.87 o
 -20  16   9     2333.37     2165.14    176.42 o
 -17  16   9      465.91       94.15     69.92 o
 -14  16   9     1114.49     1249.52    134.70 o
 -11  16   9       28.23      -41.24     54.68 o
  -8  16   9      119.61      192.91     77.81 o
  -5  16   9     2689.92     3669.08    184.61 o
  -2  16   9       20.65      107.62     81.21 o
   1  16   9     3068.04     2991.67    232.76 o
   4  16   9     2583.01     2371.76    219.03 o
   7  16   9        3.57        4.33     77.16 o
  10  16   9      264.24      271.63    107.47 o
  13  16   9      989.54      864.57    175.52 o
  16  16   9     1033.43     1260.77    218.08 o
 -31  17   9       26.45       34.87    103.74 o
 -28  17   9     3247.36     3096.92    299.56 o
 -25  17   9     2033.98     2868.86    275.86 o
 -22  17   9       86.44      -24.08     70.45 o
 -19  17   9     7628.66     6552.05    253.23 o
 -16  17   9    13363.45    12692.83    357.84 o
 -13  17   9     5348.95     5375.79    226.33 o
 -10  17   9     9950.57    10963.36    329.52 o
  -7  17   9     5049.08     5044.11    246.73 o
  -4  17   9    12586.99    12253.47    410.90 o
  -1  17   9      639.21      566.24    124.46 o
   2  17   9       83.41       60.13     82.93 o
   5  17   9     3758.77     4277.99    286.30 o
   8  17   9     4145.22     4040.32    287.55 o
  11  17   9     1185.20      883.76    176.50 o
  14  17   9      143.51      182.13    121.32 o
  17  17   9      249.13      205.14    126.47 o
 -33  18   9      279.90      168.89    116.10 o
 -30  18   9     4719.50     4784.83    359.59 o
 -27  18   9      415.67      502.12    144.43 o
 -24  18   9      110.70      237.89     95.57 o
 -21  18   9     5003.34     5460.91    298.50 o
 -18  18   9     1450.97     1166.75    148.03 o
 -15  18   9     1241.83     1841.47    161.73 o
 -12  18   9     2793.05     3877.26    210.17 o
  -9  18   9      155.30      108.00     66.59 o
  -6  18   9       19.59       58.67     73.81 o
  -3  18   9     1335.99     1642.02    183.07 o
   0  18   9      124.00      128.79     89.48 o
   3  18   9     4362.09     3969.14    276.40 o
   6  18   9     1653.98     1831.76    213.09 o
   9  18   9       11.26       18.20     85.43 o
  12  18   9      401.06      348.23    139.11 o
  15  18   9        3.54       45.34    103.84 o
  18  18   9        4.24      -35.71    101.15 o
 -35  19   9      589.67      483.34    161.11 o
 -32  19   9      188.43      196.28    125.33 o
 -29  19   9     1302.63     1423.03    224.25 o
 -26  19   9      425.67      407.13    125.50 o
 -23  19   9     1236.33     1344.10    187.97 o
 -20  19   9      940.73      677.60    130.28 o
 -17  19   9      745.76      713.35    125.53 o
 -14  19   9     6909.44     7550.72    268.32 o
 -11  19   9     1475.98      921.61    124.73 o
  -8  19   9    10006.00     9287.83    531.86 o
  -5  19   9      553.02      483.81    117.80 o
  -2  19   9     4999.66     5636.30    305.00 o
   1  19   9     2809.21     2272.45    222.93 o
   4  19   9     8409.25     8916.32    370.90 o
   7  19   9     1999.54     2019.37    222.49 o
  10  19   9     4173.00     4409.40    356.93 o
  13  19   9      168.18      161.30    121.16 o
  16  19   9     1254.81      992.36    206.62 o
 -37  20   9       17.39      -19.36    144.22 o
 -34  20   9     1275.17     1321.22    257.86 o
 -31  20   9      861.45      865.87    208.44 o
 -28  20   9      521.56      508.11    164.18 o
 -25  20   9      811.45      885.99    163.29 o
 -22  20   9     9678.34     9939.68    386.41 o
 -19  20   9     1313.46     1649.92    175.25 o
 -16  20   9     1837.54     2455.82    186.87 o
 -13  20   9    29957.36    30210.63   1107.48 o
 -10  20   9     1675.20     1788.02    173.27 o
  -7  20   9        6.57      103.22     80.78 o
  -4  20   9     1514.84     1869.62    200.82 o
  -1  20   9     2605.91     2660.96    233.99 o
   2  20   9     2037.71     2397.03    236.25 o
   5  20   9       37.54      -42.80     71.96 o
   8  20   9     2191.12     2631.06    258.09 o
  11  20   9      119.87       67.15    106.55 o
  14  20   9     2792.11     3282.15    329.42 o
  17  20   9      802.95      977.28    210.60 o
 -36  21   9       99.61       63.14    132.35 o
 -33  21   9      709.09      939.81    227.24 o
 -30  21   9       16.48       50.91    119.11 o
 -27  21   9      539.87      471.54    142.42 o
 -24  21   9      391.35      383.70    124.90 o
 -21  21   9     1664.75     2561.38    233.28 o
 -18  21   9      576.96      691.02    128.59 o
 -15  21   9     1531.64     1727.75    178.30 o
 -12  21   9     3905.07     4061.54    248.66 o
  -9  21   9      215.75      370.42    113.73 o
  -6  21   9      963.50     1287.55    177.37 o
  -3  21   9      476.26      872.51    153.08 o
   0  21   9     4285.44     4035.69    281.74 o
   3  21   9     3333.06     3931.13    287.39 o
   6  21   9      586.17      739.17    156.87 o
   9  21   9     4987.30     5178.65    373.60 o
  12  21   9      163.71      101.12    114.92 o
  15  21   9     3699.28     3673.42    349.88 o
 -35  22   9        2.73      -50.96    115.12 o
 -32  22   9      107.57       69.12    127.05 o
 -29  22   9      461.23      453.81    163.17 o
 -26  22   9     1417.72     1294.63    191.68 o
 -23  22   9     1992.38     2118.48    225.85 o
 -20  22   9     2854.96     2763.21    239.07 o
 -17  22   9       30.62      -10.73     71.15 o
 -14  22   9    10560.04    10523.33    466.62 o
 -11  22   9      424.74      460.82    120.16 o
  -8  22   9     2252.24     2874.89    240.49 o
  -5  22   9     6199.43     5777.85    314.89 o
  -2  22   9    13410.28    13100.57    739.33 o
   1  22   9     1587.52     1434.97    193.98 o
   4  22   9      688.27      627.95    146.28 o
   7  22   9     6138.52     6717.65    400.39 o
  10  22   9     1556.81     1155.79    213.05 o
  13  22   9     4085.10     3977.84    356.96 o
 -34  23   9      450.96      536.82    188.02 o
 -31  23   9      126.32      343.57    165.65 o
 -28  23   9     2372.42     2359.15    274.90 o
 -25  23   9      253.41      375.86    128.21 o
 -22  23   9      313.99      408.31    125.34 o
 -19  23   9      106.20      110.08    104.26 o
 -16  23   9     2049.31     2406.37    207.96 o
 -13  23   9     2770.21     2664.85    235.66 o
 -10  23   9     6642.39     6826.63    349.11 o
  -7  23   9     6430.35     6120.38    328.79 o
  -4  23   9       32.75        7.97     80.32 o
  -1  23   9    22882.63    23983.46    942.05 o
   2  23   9      202.99      245.73    112.78 o
   5  23   9     2975.65     2842.84    266.13 o
   8  23   9      602.66      573.34    163.52 o
  11  23   9      223.62       58.27    133.41 o
 -36  24   9      137.61      101.69    164.20 o
 -33  24   9       50.58      106.37    135.14 o
 -30  24   9       12.82      -11.07    100.29 o
 -27  24   9     5949.10     5538.98    366.04 o
 -24  24   9       10.23       42.55     93.34 o
 -21  24   9     1280.96     1460.26    213.78 o
 -18  24   9     7888.71     7799.73    436.24 o
 -15  24   9     1592.70     1754.88    187.87 o
 -12  24   9     6962.07     6196.27    340.29 o
  -9  24   9     6347.55     6664.79    330.88 o
  -6  24   9      477.45      562.85    132.69 o
  -3  24   9    22915.40    24508.40   1071.35 o
   0  24   9    11667.21    11061.26    442.20 o
   3  24   9       22.37       28.86     93.87 o
   6  24   9       29.06       31.86     96.18 o
   9  24   9      297.08      172.64    122.42 o
  12  24   9     1913.36     1771.60    263.80 o
 -35  25   9      385.34      553.44    215.82 o
 -32  25   9      112.82       69.67    126.05 o
 -29  25   9     1726.53     1796.08    246.99 o
 -26  25   9     5676.98     4839.90    327.31 o
 -23  25   9      703.99      824.39    176.81 o
 -20  25   9     2369.97     2421.89    265.19 o
 -17  25   9    18378.71    19913.32    946.99 o
 -14  25   9        0.77      -64.02     64.02 o
 -11  25   9     8222.10     7319.79    374.90 o
  -8  25   9     3142.76     3239.93    260.07 o
  -5  25   9     9140.40    10155.04    503.15 o
  -2  25   9    18557.03    18794.44    683.38 o
   1  25   9     2955.78     3169.42    278.50 o
   4  25   9      595.70      673.64    153.44 o
   7  25   9      556.07      341.53    139.32 o
  10  25   9        1.39        5.23    106.12 o
 -34  26   9      800.02      648.39    230.39 o
 -31  26   9      209.33       86.71    121.28 o
 -28  26   9     1105.55     1027.81    196.04 o
 -25  26   9     2676.49     2113.28    263.24 o
 -22  26   9       11.78       77.40     99.08 o
 -19  26   9    21713.69    21157.78    946.61 o
 -16  26   9     7461.58     6659.33    483.44 o
 -13  26   9      562.78      860.71    160.45 o
 -10  26   9      411.19      431.01    128.66 o
  -7  26   9        0.02      -46.04     71.50 o
  -4  26   9    13660.60    15957.94   1168.79 o
  -1  26   9     7794.17     7386.33    376.04 o
   2  26   9     1209.82     1301.32    200.08 o
   5  26   9     5141.67     5029.34    431.96 o
   8  26   9        5.41       17.05    105.18 o
 -33  27   9     2002.77     2070.91    361.64 o
 -30  27   9      241.59      243.47    150.86 o
 -27  27   9     1370.02     1597.71    239.64 o
 -24  27   9        9.35       28.74     98.89 o
 -21  27   9     8784.69    10119.19    778.38 o
 -18  27   9    16103.42    16203.47    622.62 o
 -15  27   9       98.09       -3.78     94.30 o
 -12  27   9      243.71       29.75     96.47 o
  -9  27   9     1227.52     1069.27    174.05 o
  -6  27   9      435.34      234.78    108.16 o
  -3  27   9     6876.55     8013.33    477.50 o
   0  27   9      584.19      571.66    145.78 o
   3  27   9     3676.89     4337.19    331.70 o
   6  27   9     1018.94     1059.86    212.62 o
 -35  28   9     3215.28     3629.14    459.32 o
 -32  28   9      420.93      453.04    248.72 o
 -29  28   9       79.35      -15.41    114.23 o
 -26  28   9       54.99      -39.57     86.47 o
 -23  28   9     1298.96     1382.32    221.46 o
 -20  28   9     8921.31     8076.46    542.76 o
 -17  28   9     6460.30     6619.73    524.63 o
 -14  28   9       43.45        4.01     88.00 o
 -11  28   9     4610.99     4842.91    319.64 o
  -8  28   9     1302.12      868.72    161.02 o
  -5  28   9      902.36      940.34    177.27 o
  -2  28   9     1348.31     1131.35    219.48 o
   1  28   9      931.59      912.26    176.01 o
   4  28   9     5209.00     5963.29    597.79 o
   7  28   9      111.06      144.44    123.13 o
 -34  29   9     3475.23     3890.88    568.84 o
 -31  29   9        6.43      -49.52    121.22 o
 -28  29   9      287.32      140.37    134.59 o
 -25  29   9     1299.70     1099.22    225.74 o
 -22  29   9     3014.97     2775.57    287.59 o
 -19  29   9     7711.29     8105.92    472.64 o
 -16  29   9       74.67        1.67     92.01 o
 -13  29   9     3879.14     5337.95    437.04 o
 -10  29   9     1855.21     1668.71    214.10 o
  -7  29   9      130.58      211.17    111.34 o
  -4  29   9     3896.76     4390.37    320.22 o
  -1  29   9      276.75      197.50    110.81 o
   2  29   9     1655.10     2065.73    250.80 o
   5  29   9      132.93       99.88    122.64 o
 -33  30   9      201.83      481.95    260.95 o
 -30  30   9       94.59      113.56    136.60 o
 -27  30   9     2009.20     2199.50    309.51 o
 -24  30   9     1293.91     1081.59    230.12 o
 -21  30   9     3822.56     3400.73    408.17 o
 -18  30   9      478.90      629.40    165.49 o
 -15  30   9        3.22       -1.14     90.20 o
 -12  30   9     9764.98    10037.88    663.11 o
  -9  30   9        9.58      -68.32     68.32 o
  -6  30   9     1332.89     1224.79    193.92 o
  -3  30   9      495.31      590.65    151.32 o
   0  30   9       17.18       28.76     92.18 o
   3  30   9      256.06      428.33    154.72 o
 -32  31   9      346.83      236.71    167.90 o
 -29  31   9     1156.98     1043.97    238.21 o
 -26  31   9     2297.52     2169.76    307.13 o
 -23  31   9     1068.43      851.67    238.94 o
 -20  31   9     4932.34     4221.05    448.02 o
 -17  31   9        1.39        7.10    107.88 o
 -14  31   9     1487.03     1317.34    218.83 o
 -11  31   9     2123.42     2165.77    260.15 o
  -8  31   9      193.61      333.04    128.26 o
  -5  31   9     1425.49     1262.17    204.17 o
  -2  31   9      247.20      179.56    110.45 o
   1  31   9      374.26      179.45    125.96 o
 -31  32   9      250.61      242.94    152.67 o
 -28  32   9     5422.49     4881.88    524.09 o
 -25  32   9      806.90      634.31    217.59 o
 -22  32   9     1432.77     1571.02    307.80 o
 -19  32   9     1625.28     1244.34    245.81 o
 -16  32   9      142.97      112.38    118.02 o
 -13  32   9      432.26      293.33    151.26 o
 -10  32   9      299.96      263.62    128.03 o
  -7  32   9      400.87      350.56    127.65 o
  -4  32   9      932.22      761.20    170.30 o
  -1  32   9      181.66      178.41    121.80 o
 -30  33   9      327.94      358.93    174.17 o
 -27  33   9      601.16      331.26    194.43 o
 -24  33   9      171.88      119.95    145.38 o
 -21  33   9     2399.45     2773.54    388.52 o
 -18  33   9        5.80      -81.50     97.04 o
 -15  33   9       39.38      148.33    124.18 o
 -12  33   9     2617.22     2554.78    323.01 o
  -9  33   9      253.65       68.71    110.74 o
  -6  33   9      635.11      462.73    156.76 o
  -3  33   9        8.84      -83.65     83.65 o
 -29  34   9      179.07      117.86    136.61 o
 -26  34   9      458.97      461.83    213.38 o
 -23  34   9      734.23      937.48    260.00 o
 -20  34   9      949.62      745.69    231.03 o
 -17  34   9      293.74       85.73    129.22 o
 -14  34   9      591.41      414.63    169.22 o
 -11  34   9     4270.93     3390.24    364.30 o
  -8  34   9       70.44      -91.37     95.67 o
  -5  34   9      353.08      258.20    140.31 o
 -28  35   9     1046.00     1289.22    302.23 o
 -25  35   9      337.77       94.33    153.21 o
 -22  35   9     1084.56     1079.04    277.29 o
 -19  35   9      410.30      297.87    154.45 o
 -16  35   9       10.42      -12.26    108.72 o
 -13  35   9      489.99      612.07    195.92 o
 -10  35   9      360.65      311.91    157.20 o
  -7  35   9      125.69     -140.18    140.18 o
 -24  36   9       15.50       72.21    152.93 o
 -21  36   9      255.52      255.54    175.51 o
 -18  36   9       44.49       27.65    144.56 o
 -15  36   9      112.82       14.83    122.52 o
 -12  36   9      425.38      570.33    184.98 o
 -20  37   9        4.14       78.92    137.91 o
 -17  37   9        0.10      129.09    181.69 o
  -1   1  10    23743.56    20402.03    339.51 o
  -3   2  10    30298.44    29142.06    369.11 o
   0   2  10     2782.68     3892.67    140.69 o
  -5   3  10    17477.13    17763.08    287.50 o
  -2   3  10     2861.07     2621.56    123.33 o
   1   3  10    26910.00    29445.01    359.23 o
  -7   4  10     8590.75     6121.29    176.65 o
  -4   4  10    12787.05    13078.92    345.10 o
  -1   4  10     2921.24     2799.92    124.11 o
   2   4  10     2438.53     2410.58    119.60 o
  -9   5  10    67907.20    59282.40   1438.15 o
  -6   5  10     3220.05     2428.84    124.08 o
  -3   5  10    18516.02    17752.04    437.64 o
   0   5  10    34262.10    34169.62    651.40 o
   3   5  10    22179.26    25840.24    616.80 o
 -11   6  10    87202.12    87732.91   2488.75 o
  -8   6  10    26582.57    24144.26    440.81 o
  -5   6  10     5069.60     5839.95    165.93 o
  -2   6  10     1044.10     1616.67    123.75 o
   1   6  10     3258.87     4394.07    173.53 o
   4   6  10     7589.62     5600.56    172.53 o
 -13   7  10    16180.49    17422.32    653.07 o
 -10   7  10    31847.17    29806.23   1059.34 o
  -7   7  10     1647.58     2436.56    125.62 o
  -4   7  10      591.23     1755.15    129.94 o
  -1   7  10       86.07       40.74     53.86 o
   2   7  10      467.67      537.32     67.61 o
   5   7  10     2426.86     2408.18    147.46 o
 -15   8  10      226.89      116.41     65.46 o
 -12   8  10     4812.84     4876.34    193.90 o
  -9   8  10     2971.32     3853.45    194.07 o
  -6   8  10     8772.89     7600.26    288.85 o
  -3   8  10    52972.71    48701.59   1430.63 o
   0   8  10     8337.29     7065.66    275.42 o
   3   8  10       54.76       -9.83     48.10 o
   6   8  10     5266.17     4736.91    225.10 o
 -17   9  10      783.07      684.93    119.79 o
 -14   9  10     4535.91     4549.54    227.51 o
 -11   9  10     1946.27     1704.92    132.15 o
  -8   9  10     5285.22     5415.96    170.02 o
  -5   9  10   117765.85   115021.32   4021.65 o
  -2   9  10   186345.13   187509.50   5457.14 o
   1   9  10    18512.81    17707.57    694.14 o
   4   9  10     3234.09     3810.97    210.24 o
   7   9  10       80.81      190.00     83.52 o
 -19  10  10    26477.51    29861.49   1205.25 o
 -16  10  10      172.67      164.56     71.72 o
 -13  10  10      113.32      133.04     60.71 o
 -10  10  10     1991.17     2519.87    146.98 o
  -7  10  10    39400.28    39771.71   1157.87 o
  -4  10  10   338110.38   347181.97  13382.02 o
  -1  10  10    56837.39    56580.60   1733.16 o
   2  10  10      932.94      639.26    105.92 o
   5  10  10     2695.05     3670.79    213.79 o
   8  10  10      278.58      109.66     77.66 o
 -21  11  10    35507.16    38671.40   1889.75 o
 -18  11  10    57737.63    59509.37   2168.30 o
 -15  11  10      347.11      322.55     81.89 o
 -12  11  10    12824.17    14241.41    614.64 o
  -9  11  10       50.55      -14.38     50.26 o
  -6  11  10   140875.31   143293.06   5551.19 o
  -3  11  10   179645.64   185739.27   6923.94 o
   0  11  10       10.44       31.26     58.47 o
   3  11  10     2066.65     2706.36    188.77 o
   6  11  10     1988.34     1969.77    176.17 o
   9  11  10     1773.61     1682.76    190.82 o
 -23  12  10     9229.36     8629.95    507.28 o
 -20  12  10    79952.42    83303.96   2981.80 o
 -17  12  10     7416.31     6675.84    287.16 o
 -14  12  10      250.44      471.50     85.10 o
 -11  12  10     5134.23     5062.92    204.73 o
  -8  12  10    12101.92     9747.66    300.20 o
  -5  12  10   158738.19   161506.14   7030.99 o
  -2  12  10     1694.12     1898.53    143.03 o
   1  12  10     1511.46     1913.85    164.62 o
   4  12  10       55.28       30.14     67.46 o
   7  12  10     2131.62     2213.87    210.71 o
  10  12  10     1977.83     1822.69    201.28 o
 -25  13  10     1990.87     2082.83    248.01 o
 -22  13  10    46007.56    42439.42   2217.57 o
 -19  13  10    25669.28    24679.52    774.80 o
 -16  13  10       21.96       31.24     63.21 o
 -13  13  10     1362.27     1672.97    145.02 o
 -10  13  10     4304.04     5239.76    208.47 o
  -7  13  10    46972.29    47625.51   1314.52 o
  -4  13  10    36999.52    35139.12   1238.58 o
  -1  13  10     3779.15     3768.29    210.57 o
   2  13  10    12742.61    12941.93    572.13 o
   5  13  10     5813.09     3664.73    250.71 o
   8  13  10     1209.96     1626.92    191.07 o
  11  13  10      995.59     1252.75    185.54 o
 -27  14  10     1871.04     1724.64    232.17 o
 -24  14  10     4277.18     4428.02    292.71 o
 -21  14  10    46418.57    43349.18   1444.86 o
 -18  14  10     1250.70     1870.47    163.65 o
 -15  14  10       96.56      215.02     84.79 o
 -12  14  10     4956.79     4477.16    212.12 o
  -9  14  10     4336.98     3428.84    203.10 o
  -6  14  10    52588.30    49587.75   1489.18 o
  -3  14  10     1041.68     1202.49    142.40 o
   0  14  10        6.63       52.32     74.12 o
   3  14  10     2416.74     3362.17    266.32 o
   6  14  10     9094.62     9190.49    449.49 o
   9  14  10      796.65     1141.16    172.28 o
  12  14  10     1018.64     1222.34    204.65 o
 -29  15  10       90.43      -32.55     95.30 o
 -26  15  10     1178.40     1325.95    208.42 o
 -23  15  10    15868.56    16632.06    836.48 o
 -20  15  10     3638.09     4123.54    227.20 o
 -17  15  10     8983.94     7694.43    291.63 o
 -14  15  10     9589.64     8531.51    273.59 o
 -11  15  10      101.92      212.82     77.12 o
  -8  15  10    12345.52    11496.55    359.90 o
  -5  15  10    11858.16    12037.52    518.97 o
  -2  15  10     1043.84     1774.09    182.17 o
   1  15  10     1627.68     2934.29    232.36 o
   4  15  10     4085.77     5015.27    293.80 o
   7  15  10       34.47      -22.78     75.47 o
  10  15  10      250.05      257.50    111.61 o
  13  15  10        6.04      -43.53     87.93 o
 -31  16  10     1629.09     1637.48    243.98 o
 -28  16  10     3723.34     3333.31    309.10 o
 -25  16  10     4203.19     3903.99    310.75 o
 -22  16  10    11028.35    12294.83    565.29 o
 -19  16  10     5665.04     4972.00    262.52 o
 -16  16  10     2064.76     2159.54    185.16 o
 -13  16  10       70.42      -16.34     59.51 o
 -10  16  10     2772.86     2758.53    195.41 o
  -7  16  10    17824.27    19358.28    396.06 o
  -4  16  10     3119.86     3138.05    231.92 o
  -1  16  10      884.16      922.21    149.89 o
   2  16  10     1057.75     1114.02    165.88 o
   5  16  10     6989.52     8020.68    345.14 o
   8  16  10     7233.93     6982.50    337.64 o
  11  16  10        4.98      -30.26     89.25 o
  14  16  10     1171.70      925.42    191.28 o
 -33  17  10     2151.94     2365.23    284.08 o
 -30  17  10      629.14      461.26    154.10 o
 -27  17  10      770.47      979.23    213.74 o
 -24  17  10     3633.61     3477.96    335.49 o
 -21  17  10      750.26      404.69    114.00 o
 -18  17  10    10128.75    10944.37    409.29 o
 -15  17  10     2130.51     2633.52    200.01 o
 -12  17  10     3153.56     2887.67    189.52 o
  -9  17  10      409.62      372.27     91.93 o
  -6  17  10      432.50      563.91    120.90 o
  -3  17  10      111.76      304.67    105.32 o
   0  17  10      856.69      561.16    126.47 o
   3  17  10    10501.34    11092.58    406.54 o
   6  17  10      977.36      770.34    154.07 o
   9  17  10     4154.45     4732.39    313.39 o
  12  17  10      767.73      886.71    187.71 o
  15  17  10      918.15     1008.63    203.86 o
 -35  18  10     1362.37     1167.92    244.42 o
 -32  18  10      523.33      471.15    172.60 o
 -29  18  10     2964.75     2915.35    336.42 o
 -26  18  10     1275.39     1249.34    232.10 o
 -23  18  10      173.54       89.92     90.60 o
 -20  18  10     2344.55     2625.47    210.38 o
 -17  18  10    10189.57    10435.64    434.90 o
 -14  18  10      254.41      480.85    103.50 o
 -11  18  10     5215.73     5803.15    237.57 o
  -8  18  10     4423.74     4588.04    333.24 o
  -5  18  10     2340.17     1730.20    192.11 o
  -2  18  10    16616.34    15950.39    640.11 o
   1  18  10     5277.89     5436.60    300.05 o
   4  18  10     6247.58     6669.36    327.53 o
   7  18  10     9303.70     9660.37    397.46 o
  10  18  10       27.55      -30.14     94.81 o
  13  18  10      392.66      170.80    119.03 o
  16  18  10       44.27      103.99    119.53 o
 -34  19  10     3020.95     3291.14    368.80 o
 -31  19  10       24.44       45.90    116.69 o
 -28  19  10       24.39      210.73    134.68 o
 -25  19  10     2860.58     2860.32    318.84 o
 -22  19  10     1800.21     1374.68    186.06 o
 -19  19  10      973.32     1147.43    155.50 o
 -16  19  10     3302.28     4297.23    255.39 o
 -13  19  10    18010.52    17947.11    628.63 o
 -10  19  10     2546.08     2074.23    198.07 o
  -7  19  10     3113.95     2816.11    231.83 o
  -4  19  10       50.97       -4.76     75.09 o
  -1  19  10     2652.80     3146.97    247.45 o
   2  19  10     5497.46     4935.40    447.37 o
   5  19  10       93.00       95.33     90.63 o
   8  19  10     5604.63     6619.44    516.71 o
  11  19  10      307.52      487.50    150.91 o
  14  19  10      786.38      529.08    159.62 o
  17  19  10       13.99      -15.92    101.20 o
 -36  20  10     2225.42     3021.18    363.36 o
 -33  20  10      990.62     1188.25    237.54 o
 -30  20  10      210.77      102.02    125.99 o
 -27  20  10       13.64      -24.89    100.21 o
 -24  20  10     6281.05     6565.20    334.66 o
 -21  20  10     4264.44     3517.10    266.52 o
 -18  20  10     6852.95     6414.07    291.67 o
 -15  20  10      946.07      801.80    127.36 o
 -12  20  10     5550.02     7563.73    352.74 o
  -9  20  10     8718.31     8626.54    379.13 o
  -6  20  10    10041.84     9037.77    486.70 o
  -3  20  10     1971.02     2147.70    218.63 o
   0  20  10     1320.89     1686.14    200.75 o
   3  20  10     1491.45     1491.05    199.41 o
   6  20  10     7637.89     7340.53    356.62 o
   9  20  10       22.87      -27.66     92.94 o
  12  20  10      355.92      203.18    121.33 o
  15  20  10     3698.02     4142.55    414.12 o
 -35  21  10      915.60     1004.84    239.02 o
 -32  21  10     1183.02     1441.53    264.07 o
 -29  21  10      836.97      594.20    183.20 o
 -26  21  10       54.81      -77.42     99.01 o
 -23  21  10    17875.34    17871.68    778.26 o
 -20  21  10     2269.21     3249.07    259.02 o
 -17  21  10     2852.88     2654.03    213.06 o
 -14  21  10     7029.01     8103.01    493.39 o
 -11  21  10     1887.15     2423.12    222.77 o
  -8  21  10     5348.43     4829.44    384.30 o
  -5  21  10       72.25       47.27     79.24 o
  -2  21  10       87.08       37.01     83.29 o
   1  21  10        4.11      -12.37     80.91 o
   4  21  10      833.71      820.47    163.43 o
   7  21  10      797.86      922.07    174.15 o
  10  21  10      142.70       85.91    110.70 o
  13  21  10     4623.71     5626.09    408.60 o
 -34  22  10      459.90      500.59    188.82 o
 -31  22  10     1329.73     1430.64    257.62 o
 -28  22  10       70.65      263.16    140.60 o
 -25  22  10     6258.22     6857.43    355.77 o
 -22  22  10     5262.31     5512.08    327.07 o
 -19  22  10     6596.42     6140.37    412.78 o
 -16  22  10      209.61      411.94    111.95 o
 -13  22  10      240.99      140.24     87.08 o
 -10  22  10     3020.09     2744.48    239.00 o
  -7  22  10     1927.26     1772.19    205.51 o
  -4  22  10      963.10      739.74    147.46 o
  -1  22  10     7984.60     7418.59    528.09 o
   2  22  10     1936.04     2009.30    227.72 o
   5  22  10      639.11      460.94    142.02 o
   8  22  10       22.94        1.08     96.31 o
  11  22  10      220.73      152.66    126.84 o
  14  22  10     4960.54     5531.75    409.39 o
 -33  23  10      527.86      754.43    211.28 o
 -30  23  10       30.22      119.41    125.18 o
 -27  23  10      213.88      237.89    140.00 o
 -24  23  10    12278.33    13002.05    465.75 o
 -21  23  10      768.85      600.88    139.30 o
 -18  23  10       40.30       12.91     86.22 o
 -15  23  10     1837.42     1489.96    174.97 o
 -12  23  10     2738.48     2704.03    284.52 o
  -9  23  10     2190.41     3102.90    251.20 o
  -6  23  10      112.62       20.46     81.19 o
  -3  23  10     7394.67     8311.25    367.26 o
   0  23  10     5151.19     5646.40    339.09 o
   3  23  10     1271.10     1139.73    191.58 o
   6  23  10      110.30       95.21     95.00 o
   9  23  10      464.86      588.00    170.86 o
  12  23  10     3347.58     3827.51    355.89 o
 -35  24  10       25.44        2.20    123.71 o
 -32  24  10      436.98      522.21    187.06 o
 -29  24  10       74.00       30.66    113.34 o
 -26  24  10     1319.47     2317.98    251.88 o
 -23  24  10     2327.49     2579.80    270.62 o
 -20  24  10      804.70      524.49    149.02 o
 -17  24  10    11473.38    11438.69    617.69 o
 -14  24  10     2613.26     2769.13    249.96 o
 -11  24  10       21.95       49.42     83.85 o
  -8  24  10      410.27      443.95    125.15 o
  -5  24  10     5274.19     5786.89    335.12 o
  -2  24  10    14061.38    15386.42    683.18 o
   1  24  10     4121.85     4308.08    309.98 o
   4  24  10      525.59      390.69    131.60 o
   7  24  10       96.86       38.33    108.52 o
  10  24  10      180.28      109.32    114.02 o
 -34  25  10      614.32      656.64    209.63 o
 -31  25  10      686.67      421.34    167.15 o
 -28  25  10        1.33      -39.61     99.74 o
 -25  25  10      305.00      337.86    142.09 o
 -22  25  10      155.06      -32.71     86.10 o
 -19  25  10     6997.14     8176.21    404.71 o
 -16  25  10    15074.45    14153.89    994.29 o
 -13  25  10      324.98      322.44    117.68 o
 -10  25  10     1044.20     1758.02    208.78 o
  -7  25  10        5.21      -39.65     76.68 o
  -4  25  10    17939.49    19888.44    868.39 o
  -1  25  10     9668.49    10926.14    476.91 o
   2  25  10     3840.61     3564.97    293.68 o
   5  25  10     2105.75     2521.06    264.32 o
   8  25  10       39.03      -49.02     85.99 o
 -33  26  10     3140.84     3305.21    430.83 o
 -30  26  10      181.38       84.01    118.49 o
 -27  26  10      457.10      354.72    137.14 o
 -24  26  10       10.31      -70.14     77.08 o
 -21  26  10     1539.37     1393.90    223.13 o
 -18  26  10    12854.86    14022.66    755.59 o
 -15  26  10     4861.69     5994.43    519.62 o
 -12  26  10      438.05      540.15    133.63 o
  -9  26  10       66.88      187.40    102.55 o
  -6  26  10     2854.56     2618.83    252.82 o
  -3  26  10    12244.76    11959.84    477.97 o
   0  26  10     3467.46     4261.07    318.23 o
   3  26  10     2243.70     2807.97    277.74 o
   6  26  10      915.93      911.23    194.42 o
   9  26  10       21.65       79.01    113.65 o
 -32  27  10     2096.91     1697.78    334.33 o
 -29  27  10       76.49      130.81    151.50 o
 -26  27  10      763.10      873.21    188.53 o
 -23  27  10      695.42      709.95    164.90 o
 -20  27  10     8579.73     7664.63    402.50 o
 -17  27  10    18387.05    20339.24   1118.29 o
 -14  27  10        0.24      -20.62     79.71 o
 -11  27  10     3603.29     3716.01    299.35 o
  -8  27  10       40.24       38.08     91.22 o
  -5  27  10     3429.25     3473.93    359.83 o
  -2  27  10     2713.99     2941.36    274.76 o
   1  27  10     1280.97     1520.65    228.98 o
   4  27  10     3319.24     3859.34    350.11 o
   7  27  10      112.10      136.69    121.67 o
 -34  28  10     7369.83     7874.00   1034.04 o
 -31  28  10       43.12     -113.38    122.55 o
 -28  28  10      635.22      892.21    193.54 o
 -25  28  10       33.14      104.92    106.90 o
 -22  28  10     4316.08     4224.52    342.08 o
 -19  28  10    14103.95    13754.89   1172.45 o
 -16  28  10     1083.15      999.87    194.16 o
 -13  28  10      225.70      339.07    122.82 o
 -10  28  10     4082.89     4723.09    319.30 o
  -7  28  10        4.68      -64.13     73.03 o
  -4  28  10     3629.09     3675.71    296.70 o
  -1  28  10      266.20      380.97    130.09 o
   2  28  10      334.94      379.80    139.22 o
   5  28  10        8.83      -16.08    106.79 o
 -33  29  10     2269.06     1947.63    435.34 o
 -30  29  10      637.85      451.34    257.28 o
 -27  29  10     1458.35     1512.13    272.64 o
 -24  29  10     1032.50     1180.49    213.09 o
 -21  29  10     5177.03     4798.34    566.47 o
 -18  29  10     6642.68     4940.97    403.59 o
 -15  29  10      127.65      144.59    108.37 o
 -12  29  10     2864.31     2581.21    254.06 o
  -9  29  10      117.19      371.66    126.99 o
  -6  29  10      502.02      509.37    139.23 o
  -3  29  10      984.25      669.61    161.33 o
   0  29  10      307.02      369.49    137.57 o
   3  29  10        7.06      -49.82     91.87 o
 -32  30  10        1.14       98.85    194.58 o
 -29  30  10      165.51      269.79    153.13 o
 -26  30  10      785.97      977.34    228.76 o
 -23  30  10     1423.49     1703.79    279.27 o
 -20  30  10     5488.77     5433.89    425.76 o
 -17  30  10       95.53      231.84    125.21 o
 -14  30  10       76.89       94.30    104.56 o
 -11  30  10      251.10      210.32    110.87 o
  -8  30  10      723.94      626.41    150.36 o
  -5  30  10     2169.94     2053.62    242.11 o
  -2  30  10     1081.26     1025.39    190.37 o
   1  30  10      173.62      232.43    125.22 o
 -31  31  10     1294.72     1754.48    422.54 o
 -28  31  10     1272.07     1021.07    232.59 o
 -25  31  10      281.11      152.23    151.99 o
 -22  31  10     1563.14     1473.30    293.82 o
 -19  31  10      914.62      642.19    185.62 o
 -16  31  10     1494.38     1493.50    260.06 o
 -13  31  10       37.57       75.35    104.77 o
 -10  31  10      835.66      856.68    170.24 o
  -7  31  10      554.86      624.17    157.05 o
  -4  31  10     2645.22     2494.10    268.07 o
  -1  31  10        2.18        7.89     89.35 o
 -30  32  10       40.68       19.96    129.98 o
 -27  32  10     1158.72      927.14    226.00 o
 -24  32  10      210.66      230.04    166.67 o
 -21  32  10     2426.29     1945.73    341.13 o
 -18  32  10       32.15       13.55    119.85 o
 -15  32  10      690.25      214.64    142.36 o
 -12  32  10      658.64      854.55    182.22 o
  -9  32  10      585.18      569.19    148.59 o
  -6  32  10     1476.97     1706.21    233.94 o
  -3  32  10      724.98      540.02    159.25 o
 -29  33  10      207.29      106.16    141.11 o
 -26  33  10        5.78       -0.92    123.10 o
 -23  33  10     1474.85     1568.94    315.68 o
 -20  33  10     2193.19     1980.65    416.24 o
 -17  33  10     1239.30     1373.43    299.10 o
 -14  33  10      972.49      976.50    221.74 o
 -11  33  10     3120.18     3832.77    476.23 o
  -8  33  10      176.43      193.19    116.09 o
  -5  33  10     2981.07     3333.62    304.05 o
 -28  34  10      149.62      -28.10    129.83 o
 -25  34  10       53.34       25.73    129.80 o
 -22  34  10     2700.41     2206.26    362.31 o
 -19  34  10     1055.19     1293.49    290.48 o
 -16  34  10     1169.66     1164.85    235.66 o
 -13  34  10     2787.28     2586.98    405.60 o
 -10  34  10     1000.14      932.80    219.27 o
  -7  34  10      799.31      903.45    202.52 o
 -24  35  10      138.05      145.57    161.20 o
 -21  35  10     3544.05     2903.70    401.37 o
 -18  35  10        3.00       13.10    120.86 o
 -15  35  10      133.03      107.18    131.14 o
 -12  35  10     1013.37     1138.38    238.54 o
  -9  35  10       94.97       93.73    132.35 o
 -23  36  10     2075.32     1982.82    615.69 o
 -20  36  10     1661.77     1688.88    327.40 o
 -17  36  10      512.08      572.68    198.16 o
 -14  36  10      172.47      338.01    163.17 o
   0   1  11    11300.45     9121.44    216.06 o
  -2   2  11     4495.65     3892.07    150.47 o
   1   2  11     7120.39     5154.63    175.10 o
  -4   3  11     3981.81     4487.65    167.16 o
  -1   3  11      373.55      190.28     55.48 o
   2   3  11     9715.58     8644.27    211.47 o
  -6   4  11      698.84      711.74     84.85 o
  -3   4  11     2640.81     2912.17    135.09 o
   0   4  11    27891.92    24482.22    470.08 o
   3   4  11    29903.87    27797.87    734.72 o
  -8   5  11   103307.71   107462.20   2484.31 o
  -5   5  11     1487.35     1225.01    100.70 o
  -2   5  11      462.56      590.84     71.90 o
   1   5  11      994.88      685.66     75.93 o
   4   5  11    56187.99    51351.52    831.02 o
 -10   6  11   101485.34   110924.78   3071.81 o
  -7   6  11    24408.31    27984.22    740.99 o
  -4   6  11     4559.00     4325.65    144.82 o
  -1   6  11     7390.50     7122.49    221.53 o
   2   6  11    29415.84    25450.91    727.27 o
   5   6  11    41831.97    42597.12   1349.11 o
 -12   7  11    37560.46    38357.24   1292.95 o
  -9   7  11    53616.79    54570.25   1256.76 o
  -6   7  11       13.27      328.05     63.81 o
  -3   7  11       95.89      698.66     99.03 o
   0   7  11     5306.23     6003.64    215.70 o
   3   7  11    14417.82    13665.43    431.97 o
   6   7  11     2701.35     2605.02    187.30 o
 -14   8  11    16915.39    13856.73    548.61 o
 -11   8  11     9743.22     8421.26    247.84 o
  -8   8  11    11812.71    11098.39    248.16 o
  -5   8  11     6942.25     7640.72    250.60 o
  -2   8  11    37687.39    42023.20    788.82 o
   1   8  11    14957.34    17236.04    621.15 o
   4   8  11      727.39      720.74    115.16 o
   7   8  11      256.86      100.87     76.78 o
 -16   9  11    27324.18    30078.83   1190.55 o
 -13   9  11     7853.52     8355.04    331.91 o
 -10   9  11     7102.08     5127.64    181.99 o
  -7   9  11     6491.30     6957.91    244.43 o
  -4   9  11    41290.25    42505.02   1121.51 o
  -1   9  11    29681.21    30275.05   1205.54 o
   2   9  11    11765.95    11210.20    428.77 o
   5   9  11       21.78      326.08     92.65 o
   8   9  11     3650.07     3571.10    225.40 o
 -18  10  11    16709.18    16202.04    869.05 o
 -15  10  11     2079.31     3875.49    225.66 o
 -12  10  11     4551.70     3838.45    173.74 o
  -9  10  11      899.54      578.08     95.09 o
  -6  10  11    41504.71    40555.23   1441.55 o
  -3  10  11   108643.21   105167.51   3631.88 o
   0  10  11     3306.37     4306.40    194.95 o
   3  10  11     1681.44     1268.17    146.95 o
   6  10  11     5671.18     6401.38    383.12 o
   9  10  11     1530.32     2205.92    194.35 o
 -20  11  11    25046.75    26728.87    998.86 o
 -17  11  11    10043.52     9786.08    410.55 o
 -14  11  11      351.97      512.96    107.44 o
 -11  11  11      231.62      545.85     96.09 o
  -8  11  11      179.24       95.21     63.79 o
  -5  11  11    65669.63    62515.09   2049.39 o
  -2  11  11     2118.27     2460.09    162.97 o
   1  11  11      770.73     1081.79    133.88 o
   4  11  11      614.29      441.06    102.70 o
   7  11  11     4866.68     6187.17    295.52 o
  10  11  11     1848.85     1582.46    193.87 o
 -22  12  11     6602.69     5633.54    320.67 o
 -19  12  11    31851.97    30743.33   1118.84 o
 -16  12  11       96.21       90.94     75.01 o
 -13  12  11      558.44      302.91     84.39 o
 -10  12  11     5295.84     4314.59    203.36 o
  -7  12  11    16456.05    16445.11    664.86 o
  -4  12  11    16197.16    16791.96    665.80 o
  -1  12  11     9148.27     8803.27    309.33 o
   2  12  11      118.30      106.25     74.88 o
   5  12  11     7469.45     8176.75    445.96 o
   8  12  11     1066.83      684.21    137.06 o
  11  12  11     2669.34     3567.36    268.73 o
 -24  13  11     1218.55     1243.99    180.90 o
 -21  13  11    33747.63    35772.76   1616.01 o
 -18  13  11     4115.59     4250.52    271.07 o
 -15  13  11     8102.01     9255.08    361.24 o
 -12  13  11     7923.37     8867.07    298.38 o
  -9  13  11    31164.71    30925.33    887.27 o
  -6  13  11     8046.90    10222.24    308.99 o
  -3  13  11      386.32      274.15     86.50 o
   0  13  11     1586.03     1512.18    160.19 o
   3  13  11     5740.36     5168.45    281.43 o
   6  13  11     4512.87     4395.25    277.86 o
   9  13  11      323.81      187.76     96.55 o
  12  13  11       24.63       54.88     98.57 o
 -26  14  11       75.50       -2.63     88.01 o
 -23  14  11      598.27     1114.82    189.20 o
 -20  14  11     3640.87     2911.64    242.65 o
 -17  14  11     1684.50     1150.60    151.83 o
 -14  14  11      191.80        6.96     69.53 o
 -11  14  11        1.94       47.18     66.89 o
  -8  14  11      471.19      406.73     93.09 o
  -5  14  11      102.41       32.32     64.43 o
  -2  14  11       64.76       22.27     72.21 o
   1  14  11     5126.36     5032.20    275.33 o
   4  14  11      323.36      364.19    111.26 o
   7  14  11      560.21      420.60    131.92 o
  10  14  11       24.88       88.61     90.03 o
  13  14  11      858.79      805.29    176.82 o
 -28  15  11     1140.63      943.40    210.87 o
 -25  15  11      611.82      382.20    154.44 o
 -22  15  11     5575.54     5823.40    318.39 o
 -19  15  11     4398.85     4426.89    280.84 o
 -16  15  11     9506.24     9223.87    388.84 o
 -13  15  11     1399.73     1896.51    161.56 o
 -10  15  11      212.78      311.31     89.80 o
  -7  15  11       43.45       61.81     64.87 o
  -4  15  11      431.36      789.63    125.10 o
  -1  15  11     1640.53     1680.63    187.57 o
   2  15  11      607.27      971.58    156.21 o
   5  15  11     8947.44     8505.26    354.70 o
   8  15  11     2421.22     2825.68    250.49 o
  11  15  11     1772.62     1734.07    211.67 o
  14  15  11       38.03      -23.35     90.59 o
 -30  16  11       87.79       38.05    117.64 o
 -27  16  11      384.70      192.18    130.45 o
 -24  16  11      302.65      101.46    109.79 o
 -21  16  11     1338.95     1106.43    174.74 o
 -18  16  11     8011.45     7176.44    294.07 o
 -15  16  11        2.05       26.42     74.49 o
 -12  16  11     4372.42     5019.36    233.08 o
  -9  16  11       28.45      114.07     70.94 o
  -6  16  11     3499.84     3673.17    223.98 o
  -3  16  11     7031.20     6294.77    320.68 o
   0  16  11     3098.71     2657.90    228.97 o
   3  16  11    10389.73     9347.94    369.44 o
   6  16  11      203.83      104.61     88.35 o
   9  16  11     8104.85     9135.26    495.15 o
  12  16  11      416.54      227.16    124.22 o
  15  16  11      759.47      947.11    220.83 o
 -32  17  11     1001.30     1026.03    227.06 o
 -29  17  11     1828.55     2245.09    302.08 o
 -26  17  11      460.30      215.73    129.03 o
 -23  17  11      625.62      483.72    139.44 o
 -20  17  11     1366.97     1920.23    194.10 o
 -17  17  11     5561.33     5342.38    265.98 o
 -14  17  11     1921.76     2472.50    184.38 o
 -11  17  11     5502.10     6481.20    268.46 o
  -8  17  11     3453.81     3807.92    211.13 o
  -5  17  11    13234.91    10543.49    438.20 o
  -2  17  11     8519.38     8490.37    604.81 o
   1  17  11     6039.79     6699.30    337.61 o
   4  17  11     7514.16     7718.03    347.19 o
   7  17  11    11014.44    10986.41    534.03 o
  10  17  11     5608.73     5652.34    346.50 o
  13  17  11      302.87      367.99    142.45 o
  16  17  11      873.00      861.56    220.94 o
 -34  18  11     2102.72     2197.54    311.33 o
 -31  18  11      561.56      449.38    174.37 o
 -28  18  11     1053.98     1161.50    244.73 o
 -25  18  11     3761.66     3335.15    342.02 o
 -22  18  11       56.42      -25.96     87.00 o
 -19  18  11     4636.12     4338.16    256.97 o
 -16  18  11     4823.38     5383.87    269.05 o
 -13  18  11       87.90      -17.42     65.07 o
 -10  18  11     1658.63     2011.23    172.39 o
  -7  18  11    15672.43    18586.17    580.10 o
  -4  18  11     1997.65     2088.45    211.75 o
  -1  18  11     2629.23     3316.20    257.84 o
   2  18  11    11584.13    11935.55    422.94 o
   5  18  11      560.40      365.90    118.46 o
   8  18  11    26366.65    26581.53   1107.95 o
  11  18  11      445.51      481.98    150.75 o
  14  18  11       97.45      -12.12     98.87 o
  17  18  11      448.85      390.78    168.91 o
 -33  19  11      435.04      509.37    176.57 o
 -30  19  11      629.30      607.65    180.92 o
 -27  19  11      777.47      832.43    200.70 o
 -24  19  11     8138.04     8990.92    451.38 o
 -21  19  11      919.91      796.43    142.26 o
 -18  19  11     6654.06     6554.08    292.68 o
 -15  19  11     1768.62     2184.02    181.95 o
 -12  19  11     7486.61     7348.72    305.66 o
  -9  19  11    21062.48    21178.56    822.65 o
  -6  19  11    29439.76    34040.61   1559.65 o
  -3  19  11     6019.75     6280.92    388.30 o
   0  19  11     5735.11     5075.45    310.24 o
   3  19  11     3499.96     4490.22    302.47 o
   6  19  11    17782.48    18279.08    776.14 o
   9  19  11     5123.93     5261.04    342.34 o
  12  19  11       12.21       29.01     95.01 o
  15  19  11      250.57      295.60    160.53 o
 -35  20  11     2112.57     2469.10    330.23 o
 -32  20  11       34.31      -40.20    116.02 o
 -29  20  11      414.85      552.10    174.49 o
 -26  20  11     2447.07     2720.54    319.92 o
 -23  20  11    29610.22    28952.65   1185.31 o
 -20  20  11     1558.29     1948.77    195.75 o
 -17  20  11     7219.46     7000.39    300.45 o
 -14  20  11     9336.12     9778.35    490.92 o
 -11  20  11      699.35      694.33    140.02 o
  -8  20  11    33038.82    35217.00   1415.35 o
  -5  20  11     2629.72     3258.13    254.53 o
  -2  20  11     3604.97     3282.79    262.66 o
   1  20  11     2428.91     1787.26    211.65 o
   4  20  11     1185.69      895.44    163.39 o
   7  20  11    11391.57    11032.29    482.65 o
  10  20  11      672.52      772.11    182.24 o
  13  20  11     1450.58     1412.32    234.85 o
 -34  21  11      532.33      259.79    162.96 o
 -31  21  11      988.43      987.07    223.26 o
 -28  21  11       12.79      -17.15    103.71 o
 -25  21  11    12903.40    12837.18    527.66 o
 -22  21  11    23201.06    21812.55    904.88 o
 -19  21  11     9001.51     8813.27    374.73 o
 -16  21  11     5086.47     5523.96    307.32 o
 -13  21  11     1925.69     2371.17    206.38 o
 -10  21  11    15119.81    15836.83    608.97 o
  -7  21  11    18813.17    18861.31    934.82 o
  -4  21  11     4807.99     5116.85    310.96 o
  -1  21  11      704.19      583.80    141.25 o
   2  21  11       25.83      111.61     95.20 o
   5  21  11     8174.84     9110.30    402.06 o
   8  21  11     2423.25     2145.30    268.67 o
  11  21  11      282.36      300.91    139.16 o
  14  21  11     4263.12     5190.95    448.78 o
 -33  22  11      130.25      -48.23    106.87 o
 -30  22  11      676.38      524.96    178.06 o
 -27  22  11     2050.66     2030.49    291.95 o
 -24  22  11    29768.58    32026.90    848.84 o
 -21  22  11     1026.76      976.65    169.73 o
 -18  22  11     3040.46     2982.83    304.52 o
 -15  22  11      370.40      418.52    110.98 o
 -12  22  11     2408.99     2597.39    236.05 o
  -9  22  11    20814.14    17931.05   1017.59 o
  -6  22  11        5.88      -42.25     70.44 o
  -3  22  11     2209.05     2183.17    229.76 o
   0  22  11      332.70      433.85    130.01 o
   3  22  11     2281.01     2385.13    245.46 o
   6  22  11     1704.18     1367.05    204.85 o
   9  22  11        8.36      -23.56     86.79 o
  12  22  11     2929.90     3059.82    324.20 o
 -35  23  11     2279.93     2659.27    402.12 o
 -32  23  11      899.87      933.50    265.45 o
 -29  23  11       68.60       22.82    117.77 o
 -26  23  11    10318.76     9474.31    451.13 o
 -23  23  11    16540.13    17132.86    736.60 o
 -20  23  11     1863.46     1900.06    238.42 o
 -17  23  11      416.81      432.75    123.21 o
 -14  23  11     3083.30     3749.70    275.52 o
 -11  23  11     9370.15     8564.85    364.52 o
  -8  23  11     2150.21     2132.27    224.30 o
  -5  23  11     1261.61      997.01    166.77 o
  -2  23  11     6026.91     6756.04    489.50 o
   1  23  11     2502.64     3119.46    277.11 o
   4  23  11     2117.75     2658.99    265.14 o
   7  23  11      575.13      574.66    161.53 o
  10  23  11      335.28      364.87    147.91 o
 -34  24  11       81.75       73.43    134.04 o
 -31  24  11       36.91       30.29    115.61 o
 -28  24  11     1169.19     1178.50    235.26 o
 -25  24  11     9355.81     8083.32    386.55 o
 -22  24  11      472.63      602.01    161.03 o
 -19  24  11      351.20      383.22    137.08 o
 -16  24  11     7471.44     7941.85    359.01 o
 -13  24  11     6266.98     7343.05    547.27 o
 -10  24  11     1881.56     1960.65    215.46 o
  -7  24  11      126.56       33.99     81.37 o
  -4  24  11     5054.27     5601.36    357.45 o
  -1  24  11     4061.21     4402.09    312.88 o
   2  24  11     3445.96     4217.31    313.03 o
   5  24  11     1078.39     1207.83    197.89 o
   8  24  11        0.40      -52.68     95.09 o
 -33  25  11      829.22      671.30    208.91 o
 -30  25  11      416.63      390.59    162.93 o
 -27  25  11     2230.28     1950.21    292.45 o
 -24  25  11     1442.66     1201.05    211.66 o
 -21  25  11        0.57       40.05     98.04 o
 -18  25  11     3601.74     3074.15    289.77 o
 -15  25  11     9886.64    11513.88    548.33 o
 -12  25  11      677.20      818.83    156.50 o
  -9  25  11      234.16      180.63    102.69 o
  -6  25  11      908.40      860.90    157.27 o
  -3  25  11     8091.19     8056.43    486.67 o
   0  25  11     2701.65     2835.19    271.51 o
   3  25  11     1295.80     1420.94    211.55 o
   6  25  11     1116.82     1157.25    217.19 o
   9  25  11      479.03      364.28    149.60 o
 -32  26  11     4600.74     4891.81    500.39 o
 -29  26  11      503.17      235.46    161.21 o
 -26  26  11      286.45      561.61    166.69 o
 -23  26  11       22.82       61.71    104.49 o
 -20  26  11     2834.53     2902.21    291.06 o
 -17  26  11     8852.44     7651.63    546.42 o
 -14  26  11      588.48      939.01    179.27 o
 -11  26  11     1369.57     2269.54    240.90 o
  -8  26  11      273.50       96.83     90.44 o
  -5  26  11     3544.89     3659.84    290.28 o
  -2  26  11     3051.42     3179.50    278.89 o
   1  26  11      689.32      690.84    157.33 o
   4  26  11     3093.89     3289.77    298.29 o
   7  26  11       77.08      120.07    123.45 o
 -31  27  11     1828.04     1964.01    359.97 o
 -28  27  11      240.03      408.73    170.51 o
 -25  27  11      122.70       42.61    107.78 o
 -22  27  11       26.36      -18.67     92.68 o
 -19  27  11     5163.95     3979.48    368.27 o
 -16  27  11     3686.09     3304.50    305.32 o
 -13  27  11       30.96       88.11     93.84 o
 -10  27  11     3228.62     3998.82    359.36 o
  -7  27  11       45.96       12.57     81.87 o
  -4  27  11     1203.51     1490.89    210.03 o
  -1  27  11       37.82       61.17     96.83 o
   2  27  11      102.55      167.11    111.82 o
   5  27  11     1247.95     1124.20    211.20 o
 -33  28  11     4229.40     4148.82    587.14 o
 -30  28  11       43.81      160.67    159.57 o
 -27  28  11     1045.01     1010.86    206.29 o
 -24  28  11        8.32       43.75     98.66 o
 -21  28  11     1026.07     1085.54    227.02 o
 -18  28  11     4366.45     3623.11    358.25 o
 -15  28  11      179.61      116.39    120.74 o
 -12  28  11     2736.18     2886.40    293.93 o
  -9  28  11      311.41       94.07     98.47 o
  -6  28  11      779.40      605.35    147.80 o
  -3  28  11      181.93       35.01     92.28 o
   0  28  11      467.04      473.91    147.71 o
   3  28  11      241.33      353.20    138.98 o
 -32  29  11      857.41      655.65    382.04 o
 -29  29  11      345.80      364.05    171.58 o
 -26  29  11      741.07      675.46    178.69 o
 -23  29  11       85.14       12.44    112.26 o
 -20  29  11     2584.37     2586.09    322.36 o
 -17  29  11       12.72      -42.41     98.56 o
 -14  29  11      170.87        2.54     90.58 o
 -11  29  11     1724.22     1326.74    198.19 o
  -8  29  11      923.81      760.73    176.03 o
  -5  29  11       42.54       82.97     98.03 o
  -2  29  11       18.13      -77.66     77.66 o
   1  29  11       24.99      -11.65     93.56 o
 -31  30  11      558.47      481.81    267.80 o
 -28  30  11      232.71       77.80    125.54 o
 -25  30  11       51.68      -13.96     99.06 o
 -22  30  11       44.02      -50.53     94.77 o
 -19  30  11      240.46      285.97    146.20 o
 -16  30  11     1052.05      698.78    175.61 o
 -13  30  11      143.84       83.68    110.84 o
 -10  30  11       47.35      -36.15     80.94 o
  -7  30  11      494.71      485.77    141.26 o
  -4  30  11      623.75     1062.79    194.58 o
  -1  30  11       10.74      -37.81     95.06 o
 -30  31  11      471.00      428.27    210.90 o
 -27  31  11      771.89      977.67    234.52 o
 -24  31  11      333.33      278.75    179.00 o
 -21  31  11        0.67        2.97    104.21 o
 -18  31  11      109.78       57.03    115.21 o
 -15  31  11     1408.33     1143.83    209.11 o
 -12  31  11        1.20      -15.91     94.52 o
  -9  31  11     2209.78     2567.92    342.48 o
  -6  31  11      292.75      191.75    116.66 o
  -3  31  11     1362.88     1645.84    232.66 o
 -29  32  11      101.54       45.67    131.40 o
 -26  32  11      223.45      118.65    155.55 o
 -23  32  11        1.40      -42.60    118.73 o
 -20  32  11       55.30      118.03    145.82 o
 -17  32  11     1504.37     1802.45    254.66 o
 -14  32  11      336.44      350.43    141.82 o
 -11  32  11      785.55     1039.91    204.32 o
  -8  32  11       69.36      182.99    117.79 o
  -5  32  11     3236.47     3167.36    296.68 o
 -28  33  11      141.38       -1.03    159.50 o
 -25  33  11       31.76       22.21    135.55 o
 -22  33  11     1381.04     1194.32    281.93 o
 -19  33  11      619.96      414.74    199.30 o
 -16  33  11     1464.18     1689.98    280.14 o
 -13  33  11      432.49      400.45    152.87 o
 -10  33  11      836.60      854.36    207.57 o
  -7  33  11     1822.00     1454.97    220.69 o
 -24  34  11       96.43      163.43    157.14 o
 -21  34  11     4383.16     4512.46    555.78 o
 -18  34  11      206.04      298.79    171.78 o
 -15  34  11     1460.74     1618.49    277.11 o
 -12  34  11     1034.29      918.82    222.08 o
  -9  34  11       83.12      184.44    138.08 o
 -23  35  11     2643.17     2514.17    389.20 o
 -20  35  11     4227.74     4230.76    576.40 o
 -17  35  11      540.43      879.97    218.35 o
 -14  35  11      505.84      575.89    188.39 o
   0   0  12     3886.69     3138.67    254.16 o
   1   1  12     1109.94     1416.88    110.71 o
  -1   2  12     7827.49     7400.00    205.13 o
   2   2  12    12899.66    15149.97    288.70 o
  -3   3  12     1031.76     1208.16    105.75 o
   0   3  12      170.54       61.99     49.58 o
   3   3  12       75.58      108.78     56.72 o
  -5   4  12     1276.69     1020.61    104.84 o
  -2   4  12     1857.75     1665.68    116.01 o
   1   4  12     6787.88    10291.86    270.63 o
   4   4  12    51680.79    50875.13   1693.94 o
  -7   5  12    31452.86    31182.91    748.63 o
  -4   5  12      871.58      661.82     83.96 o
  -1   5  12     1874.68     1659.75    135.30 o
   2   5  12     5519.40     4061.30    189.35 o
   5   5  12    43972.90    43314.45   1306.29 o
  -9   6  12    66114.45    58280.05   1522.57 o
  -6   6  12     2046.69     1623.50    136.40 o
  -3   6  12      397.45      323.41     77.81 o
   0   6  12       47.33      117.04     62.78 o
   3   6  12    36183.02    37914.64    968.47 o
   6   6  12    28703.06    26968.98    893.16 o
 -11   7  12    35860.20    32683.24    943.62 o
  -8   7  12    40253.49    35545.41   1002.45 o
  -5   7  12      704.76      971.58    115.01 o
  -2   7  12      451.52      661.21     99.36 o
   1   7  12     2178.06     2226.35    155.49 o
   4   7  12     8519.13     9484.88    400.68 o
   7   7  12     1005.78      741.96    126.39 o
 -13   8  12     9666.41    10752.82    327.50 o
 -10   8  12    17420.88    18039.36    438.14 o
  -7   8  12      773.76     1742.86    143.79 o
  -4   8  12       79.57       99.86     62.92 o
  -1   8  12     3260.01     3419.05    184.42 o
   2   8  12    15596.01    14241.49    686.01 o
   5   8  12       68.19       80.59     73.97 o
   8   8  12      688.21      870.90    133.73 o
 -15   9  12     2051.80     1919.70    177.42 o
 -12   9  12    12390.68    15528.54    386.03 o
  -9   9  12       29.95      -10.80     55.41 o
  -6   9  12      224.00      104.30     63.25 o
  -3   9  12     8371.44     7153.27    240.58 o
   0   9  12      309.99      395.13     85.50 o
   3   9  12     5580.58     5819.56    246.84 o
   6   9  12     5924.57     6406.14    268.04 o
   9   9  12      580.01      318.91    100.95 o
 -17  10  12     2595.05     2675.60    208.05 o
 -14  10  12     3483.85     3783.63    250.22 o
 -11  10  12     1502.37     1660.56    146.55 o
  -8  10  12     2995.84     2480.05    169.01 o
  -5  10  12     4615.10     4525.70    205.98 o
  -2  10  12      748.25      913.73    117.12 o
   1  10  12     3086.49     2601.06    198.84 o
   4  10  12     9698.82     9863.51    491.11 o
   7  10  12     1541.92     1110.58    148.75 o
  10  10  12      192.55      -41.48     77.21 o
 -19  11  12     7679.85     7294.52    390.66 o
 -16  11  12      614.08      336.93    109.93 o
 -13  11  12      291.00      253.29     89.98 o
 -10  11  12     2350.96     1954.38    157.92 o
  -7  11  12     1606.68     1904.25    155.59 o
  -4  11  12      518.70      516.32     96.61 o
  -1  11  12     3447.11     3563.78    217.12 o
   2  11  12     2291.17     2673.47    199.45 o
   5  11  12      423.21      342.16     99.29 o
   8  11  12      828.88      510.48    128.05 o
  11  11  12     6554.21     5982.42    323.22 o
 -21  12  12     3068.98     3317.89    352.94 o
 -18  12  12     5334.58     6038.68    304.58 o
 -15  12  12      569.09      529.07    123.50 o
 -12  12  12     1039.25      537.42    112.88 o
  -9  12  12     5084.70     5011.70    240.67 o
  -6  12  12     2757.48     3869.03    205.52 o
  -3  12  12     3149.78     4387.66    209.74 o
   0  12  12        5.52       25.91     66.04 o
   3  12  12     1680.85     1918.17    182.38 o
   6  12  12        9.07       15.53     80.18 o
   9  12  12     4810.32     4954.57    304.86 o
  12  12  12     5123.19     4036.14    321.08 o
 -23  13  12     5517.56     5590.98    354.71 o
 -20  13  12    10856.26    11857.55    564.80 o
 -17  13  12      132.11       38.70     81.64 o
 -14  13  12      630.90      616.18    120.84 o
 -11  13  12     1174.28      522.45    103.35 o
  -8  13  12    26250.12    27656.27    722.44 o
  -5  13  12    20376.30    20271.86    808.21 o
  -2  13  12     9580.65    11561.00    467.98 o
   1  13  12     4718.72     4318.01    240.60 o
   4  13  12     5116.05     4845.18    283.77 o
   7  13  12     1829.37     1567.35    193.65 o
  10  13  12     3211.47     2481.33    302.35 o
  13  13  12     1287.48     1338.01    279.40 o
 -25  14  12     5522.84     6317.96    471.70 o
 -22  14  12     2040.26     2462.17    262.36 o
 -19  14  12      511.54      191.28     98.16 o
 -16  14  12     5104.08     5831.41    298.30 o
 -13  14  12     1943.01     1750.54    160.00 o
 -10  14  12      139.67      355.95     93.32 o
  -7  14  12    38672.66    42126.39    970.66 o
  -4  14  12     7695.51     8228.04    322.05 o
  -1  14  12      218.05      382.43    109.43 o
   2  14  12    18797.24    19229.66    884.16 o
   5  14  12       31.82      -16.46     78.95 o
   8  14  12      110.44       27.56     77.73 o
  11  14  12        2.87       28.44     81.45 o
  14  14  12      748.60      813.84    204.41 o
 -27  15  12      201.48      336.74    148.61 o
 -24  15  12     5023.96     5613.81    406.04 o
 -21  15  12     1380.97     2171.48    225.54 o
 -18  15  12     7959.30     8328.59    402.19 o
 -15  15  12     4613.18     4411.87    252.62 o
 -12  15  12      276.84      131.64     77.26 o
  -9  15  12      737.71      765.99    118.55 o
  -6  15  12     3438.13     3204.99    216.91 o
  -3  15  12      134.78      142.57     91.15 o
   0  15  12     2468.30     2797.98    254.98 o
   3  15  12     2507.92     2221.05    244.99 o
   6  15  12     1457.34     1110.14    178.73 o
   9  15  12     2630.63     2251.74    239.78 o
  12  15  12     1065.77     1177.42    207.93 o
  15  15  12        1.44      -61.06     99.16 o
 -29  16  12      597.53      691.80    194.12 o
 -26  16  12     1308.99     1412.50    246.61 o
 -23  16  12      729.45      473.21    141.30 o
 -20  16  12      633.34      930.08    164.48 o
 -17  16  12     1471.37     2197.37    208.46 o
 -14  16  12     9146.48     9670.00    334.08 o
 -11  16  12     2937.20     2218.88    181.13 o
  -8  16  12      363.56      205.12     82.31 o
  -5  16  12     4377.09     4085.20    266.46 o
  -2  16  12     2419.10     2829.86    235.55 o
   1  16  12      341.12      225.52    105.33 o
   4  16  12     3721.59     4098.15    286.80 o
   7  16  12     3561.51     3553.31    278.51 o
  10  16  12     4939.54     5741.79    349.38 o
  13  16  12      276.63      175.52    130.48 o
  16  16  12      752.77      749.33    205.80 o
 -31  17  12      116.35      -34.68    105.04 o
 -28  17  12      134.89      186.74    119.72 o
 -25  17  12       10.74      128.26    115.70 o
 -22  17  12       49.45       57.61     90.50 o
 -19  17  12     3594.23     3651.18    278.87 o
 -16  17  12     4676.75     4630.84    331.03 o
 -13  17  12     3448.65     3149.71    207.82 o
 -10  17  12     3279.54     3528.72    215.17 o
  -7  17  12    21064.96    19160.61    867.92 o
  -4  17  12     5532.13     5854.31    308.17 o
  -1  17  12        5.02       -2.28     75.98 o
   2  17  12     1311.04     1447.75    193.70 o
   5  17  12      173.36       63.06     94.72 o
   8  17  12    22990.24    23483.39    624.80 o
  11  17  12     2478.90     2636.25    291.42 o
  14  17  12       31.21       11.50    110.68 o
  17  17  12      481.92      525.50    191.03 o
 -33  18  12      113.02      156.61    140.70 o
 -30  18  12     3533.61     3599.25    374.17 o
 -27  18  12      519.98      467.34    165.36 o
 -24  18  12      978.85     1089.01    219.34 o
 -21  18  12      972.01     1043.13    169.15 o
 -18  18  12     2605.07     2949.54    229.82 o
 -15  18  12     6681.95     8656.41    445.87 o
 -12  18  12      738.29     1645.76    168.67 o
  -9  18  12    30263.01    28761.18   1182.09 o
  -6  18  12    28590.46    30194.00    830.97 o
  -3  18  12      668.71      833.13    148.04 o
   0  18  12      175.45      104.13     95.07 o
   3  18  12     4009.59     3737.86    282.59 o
   6  18  12    13599.58    13699.13    489.97 o
   9  18  12    13585.98    12662.22    568.13 o
  12  18  12      240.56       87.70    112.30 o
  15  18  12        0.15      -27.05    109.68 o
 -32  19  12      658.40      480.89    170.46 o
 -29  19  12     2069.18     1778.99    274.91 o
 -26  19  12     1495.04     1254.59    232.97 o
 -23  19  12     6994.11     6530.06    385.43 o
 -20  19  12      155.25       69.02     92.41 o
 -17  19  12      272.93      392.21    109.17 o
 -14  19  12      167.14       66.08     76.18 o
 -11  19  12      519.58      347.19    118.00 o
  -8  19  12    37459.60    37116.18   1788.08 o
  -5  19  12     6149.50     5423.10    424.36 o
  -2  19  12      832.00      480.37    129.38 o
   1  19  12     1202.67     1416.62    194.65 o
   4  19  12      333.89      595.14    141.31 o
   7  19  12    21826.66    22236.81   1070.40 o
  10  19  12     3373.72     3258.27    356.35 o
  13  19  12      235.73      267.93    152.02 o
 -34  20  12        2.18       60.18    132.26 o
 -31  20  12      904.20     1198.82    253.24 o
 -28  20  12      244.19      132.45    126.24 o
 -25  20  12     8532.87     7768.81    484.01 o
 -22  20  12    13756.70    13059.18    509.59 o
 -19  20  12     1247.62      973.45    153.30 o
 -16  20  12      454.57      220.08     94.13 o
 -13  20  12     4067.22     4281.08    298.84 o
 -10  20  12    19769.27    19344.22    736.98 o
  -7  20  12    46047.12    47868.65   1922.95 o
  -4  20  12      107.30      -27.58     72.25 o
  -1  20  12     1062.76     1002.67    168.59 o
   2  20  12     1031.55     1105.63    178.76 o
   5  20  12     7748.54     8556.64    388.35 o
   8  20  12     5963.91     6522.43    411.36 o
  11  20  12       46.51       50.48    109.59 o
  14  20  12     1048.32     1282.92    257.15 o
 -33  21  12      377.42      456.46    178.15 o
 -30  21  12       69.29       48.03    117.75 o
 -27  21  12      343.68      367.91    151.87 o
 -24  21  12    26029.11    26363.81   1158.14 o
 -21  21  12     4971.59     5568.86    367.63 o
 -18  21  12     2155.01     2459.71    219.32 o
 -15  21  12     1477.07     1716.01    200.85 o
 -12  21  12       24.21        8.78     82.97 o
  -9  21  12    33497.88    35367.70   1256.42 o
  -6  21  12     1272.04     1242.51    180.91 o
  -3  21  12       84.44       64.95     86.38 o
   0  21  12       19.22       48.68     87.42 o
   3  21  12      220.76      315.59    119.19 o
   6  21  12     1676.26     1531.49    215.72 o
   9  21  12      906.78     1043.35    202.51 o
  12  21  12     1000.11     1229.36    223.00 o
 -32  22  12       27.40       48.78    129.90 o
 -29  22  12        0.74       19.08    110.78 o
 -26  22  12     6215.27     5943.23    441.53 o
 -23  22  12    23200.59    24061.06   1325.58 o
 -20  22  12       13.86      -45.07     76.48 o
 -17  22  12      444.74      678.04    143.50 o
 -14  22  12      327.29      233.22    114.30 o
 -11  22  12     7895.35     7756.02    434.43 o
  -8  22  12     6785.45     7165.36    343.29 o
  -5  22  12        1.08       32.46     83.96 o
  -2  22  12      634.16      728.80    152.27 o
   1  22  12      205.62      332.58    120.30 o
   4  22  12      614.19      539.19    140.48 o
   7  22  12     1009.06      833.33    171.37 o
  10  22  12       35.32      114.08    113.02 o
 -34  23  12      399.02      238.48    161.72 o
 -31  23  12      210.88       51.43    122.97 o
 -28  23  12      677.50      946.46    217.04 o
 -25  23  12     9428.71     9988.89    466.83 o
 -22  23  12     3348.17     3221.75    304.64 o
 -19  23  12      115.33      176.45    113.33 o
 -16  23  12      200.79      316.91    124.87 o
 -13  23  12     2220.48     1977.19    218.05 o
 -10  23  12     7734.37     8126.96    594.00 o
  -7  23  12       88.07       11.21     83.85 o
  -4  23  12      482.54      268.72    107.74 o
  -1  23  12      995.99     1065.53    177.38 o
   2  23  12     1091.53     1078.04    181.55 o
   5  23  12      229.24      266.98    116.39 o
   8  23  12        2.79      -34.90     85.00 o
  11  23  12      309.68      353.23    152.80 o
 -33  24  12       73.68       48.01    132.76 o
 -30  24  12       65.42       75.86    125.57 o
 -27  24  12     4173.55     4055.14    525.45 o
 -24  24  12     3363.60     3707.56    365.45 o
 -21  24  12      247.70      213.24    122.45 o
 -18  24  12      666.15      732.91    163.85 o
 -15  24  12     2062.16     2110.48    250.35 o
 -12  24  12     3254.32     4214.14    311.21 o
  -9  24  12      540.75      459.44    132.06 o
  -6  24  12      479.58      384.45    122.95 o
  -3  24  12     1770.17     2045.18    231.22 o
   0  24  12      991.17     1004.00    177.98 o
   3  24  12        0.40      -58.41     83.44 o
   6  24  12     1299.25     1196.04    200.56 o
   9  24  12       90.08       80.84    115.88 o
 -32  25  12     1009.23     1099.85    242.74 o
 -29  25  12      652.25      624.70    190.93 o
 -26  25  12     2723.09     2889.06    340.14 o
 -23  25  12        9.47      -54.74     84.29 o
 -20  25  12       72.99       64.45    106.27 o
 -17  25  12     1996.05     1894.09    271.85 o
 -14  25  12      616.68      528.57    135.61 o
 -11  25  12      877.94     1034.56    173.16 o
  -8  25  12      243.24      106.74     93.55 o
  -5  25  12      227.12      188.55    109.04 o
  -2  25  12     1107.30     1079.46    185.02 o
   1  25  12       15.24       -3.72     83.96 o
   4  25  12     1742.94     1713.02    230.94 o
   7  25  12      533.16      388.85    149.94 o
 -31  26  12     1770.62     1352.71    302.22 o
 -28  26  12      150.15      166.54    167.67 o
 -25  26  12       57.28      172.41    137.50 o
 -22  26  12      737.59      672.58    171.01 o
 -19  26  12      844.26      895.61    204.14 o
 -16  26  12     1640.90     1570.48    294.49 o
 -13  26  12        1.83       -9.02     81.65 o
 -10  26  12      191.61      196.40    106.87 o
  -7  26  12      420.84      322.75    118.35 o
  -4  26  12      192.77      240.22    114.49 o
  -1  26  12      195.10       66.73     99.15 o
   2  26  12        0.50       -7.73     89.51 o
   5  26  12     3868.15     3906.04    350.62 o
 -30  27  12     1865.96     1482.81    312.91 o
 -27  27  12       26.23       19.58    118.98 o
 -24  27  12      502.34      747.99    183.38 o
 -21  27  12      920.29      539.05    173.26 o
 -18  27  12     1146.30     1040.37    219.59 o
 -15  27  12       45.33      -43.05     76.89 o
 -12  27  12     1855.47     1774.82    219.89 o
  -9  27  12       87.63      -11.74     81.70 o
  -6  27  12     1119.98     1021.97    180.42 o
  -3  27  12      896.47      966.44    182.95 o
   0  27  12     2748.74     3185.74    295.98 o
   3  27  12     2333.66     2318.31    263.00 o
 -32  28  12     1751.97     1907.26    349.21 o
 -29  28  12       16.13       59.27    143.23 o
 -26  28  12      270.05      160.07    133.42 o
 -23  28  12      347.37      415.45    166.25 o
 -20  28  12       79.53      104.15    123.14 o
 -17  28  12       19.48      -52.92    104.74 o
 -14  28  12     1112.27     1367.68    200.89 o
 -11  28  12     5216.55     4987.51    372.13 o
  -8  28  12      448.84      304.71    129.86 o
  -5  28  12     1753.02     1465.55    209.41 o
  -2  28  12     4662.46     4635.81    410.19 o
   1  28  12      261.04      207.75    118.97 o
   4  28  12     2291.51     2174.54    367.27 o
 -31  29  12       11.53      -78.44    117.56 o
 -28  29  12      158.27       18.58    125.38 o
 -25  29  12       51.75      -82.02     82.02 o
 -22  29  12     2121.46     2337.69    315.40 o
 -19  29  12      390.59      337.84    152.11 o
 -16  29  12      275.66      143.69    117.11 o
 -13  29  12     3831.40     4711.99    333.62 o
 -10  29  12     3422.81     3263.26    289.51 o
  -7  29  12     4665.03     4727.24    452.08 o
  -4  29  12     2381.87     2556.80    273.29 o
  -1  29  12     3099.04     2949.14    293.36 o
   2  29  12      324.17      316.85    137.67 o
 -30  30  12      126.14       13.63    188.89 o
 -27  30  12     1125.11     1104.09    241.77 o
 -24  30  12      772.68      628.24    198.20 o
 -21  30  12     2256.36     2581.40    330.46 o
 -18  30  12      730.27      551.95    204.10 o
 -15  30  12      215.85       64.99    108.00 o
 -12  30  12     2547.15     3375.59    320.76 o
  -9  30  12      630.55      620.96    156.55 o
  -6  30  12     1345.12     1391.37    212.79 o
  -3  30  12      122.19      203.73    124.22 o
   0  30  12       50.04      -37.29     90.93 o
 -29  31  12      384.16      456.17    215.31 o
 -26  31  12      114.92      292.28    188.20 o
 -23  31  12     2837.93     3086.63    351.50 o
 -20  31  12     2745.10     2308.31    331.77 o
 -17  31  12     1213.14     1373.52    260.10 o
 -14  31  12      288.64      244.21    131.15 o
 -11  31  12        5.43      -31.53     85.66 o
  -8  31  12      259.82      241.16    116.97 o
  -5  31  12      105.07      117.58    110.41 o
  -2  31  12      103.27       29.13     99.64 o
 -28  32  12      823.09      944.26    338.80 o
 -25  32  12      315.77      223.14    174.20 o
 -22  32  12      496.70      359.68    193.27 o
 -19  32  12      262.29      192.93    140.65 o
 -16  32  12      349.49      244.14    132.69 o
 -13  32  12      450.81      332.67    146.06 o
 -10  32  12      194.57      207.70    114.70 o
  -7  32  12      370.13      338.75    137.70 o
  -4  32  12     2885.63     2997.07    327.83 o
 -24  33  12       10.47      -56.17    125.67 o
 -21  33  12      571.60      482.36    206.34 o
 -18  33  12      246.54      200.97    161.55 o
 -15  33  12        1.66        0.95     99.23 o
 -12  33  12       13.55       15.02    103.47 o
  -9  33  12       36.92        5.43     98.43 o
 -23  34  12     1151.62      929.50    257.73 o
 -20  34  12     3120.26     2776.20    394.68 o
 -17  34  12       44.87        4.57    128.09 o
 -14  34  12       18.44       68.97    121.65 o
 -11  34  12       95.47      -28.37     97.49 o
  -1   1  13   124450.28   125389.37   1708.02 o
  -3   2  13     5162.85     5868.40    195.91 o
   0   2  13    53056.54    52384.41    596.58 o
  -5   3  13      459.92      550.45     94.98 o
  -2   3  13    16199.97    16332.49    346.56 o
   1   3  13      208.59      322.09     81.47 o
  -7   4  13     1540.13     1234.30    125.05 o
  -4   4  13     1396.72     1289.95    127.47 o
  -1   4  13     1281.52     1845.93    148.06 o
   2   4  13     4305.14     3247.28    182.21 o
  -9   5  13    10272.43     8675.85    264.99 o
  -6   5  13      281.84      -35.79     53.34 o
  -3   5  13        1.28       -0.74     55.57 o
   0   5  13     2634.93     2234.61    159.73 o
   3   5  13     4103.68     4502.18    205.92 o
 -11   6  13    15828.23    15969.33    530.45 o
  -8   6  13    21310.57    21515.94    603.90 o
  -5   6  13     1338.08     1371.36    134.42 o
  -2   6  13     2199.60     2149.23    157.76 o
   1   6  13     5462.02     5121.79    212.06 o
   4   6  13    20744.97    19263.36    606.54 o
 -13   7  13     1810.97     2521.80    218.57 o
 -10   7  13    19071.63    20088.33    601.52 o
  -7   7  13      528.40      634.33    103.55 o
  -4   7  13     1461.11     2084.91    157.33 o
  -1   7  13     1085.82     1305.12    133.71 o
   2   7  13     3308.67     3321.66    188.12 o
   5   7  13     5781.83     4711.00    244.68 o
 -15   8  13     3979.84     5052.99    290.88 o
 -12   8  13     5153.36     7206.53    392.54 o
  -9   8  13     1856.39     3389.08    192.97 o
  -6   8  13     3653.11     3329.62    189.61 o
  -3   8  13      269.00      286.18     81.51 o
   0   8  13     3264.27     4172.37    205.46 o
   3   8  13     1799.13     1152.43    144.39 o
   6   8  13      684.38      179.47     83.96 o
 -17   9  13      862.98     1518.60    191.12 o
 -14   9  13     1559.56     1514.81    183.89 o
 -11   9  13      843.18      767.45    139.66 o
  -8   9  13     5754.19     4758.66    217.22 o
  -5   9  13     3317.76     3342.92    193.23 o
  -2   9  13      724.90      964.27    123.22 o
   1   9  13      528.61      480.99    106.55 o
   4   9  13     1855.71     1776.66    175.65 o
   7   9  13     6666.54     7306.03    301.80 o
 -19  10  13        5.14       68.95     85.50 o
 -16  10  13      196.85       75.63     85.35 o
 -13  10  13       13.37      -28.30     69.88 o
 -10  10  13     1110.32     1462.22    144.90 o
  -7  10  13     8208.94     8068.03    266.13 o
  -4  10  13      115.72      -28.56     58.10 o
  -1  10  13     3433.64     3468.25    218.54 o
   2  10  13     1390.50     2117.99    184.92 o
   5  10  13        4.61       -5.68     67.35 o
   8  10  13     3202.46     2820.41    238.31 o
 -21  11  13      983.45      752.90    162.64 o
 -18  11  13        9.74       29.00     80.51 o
 -15  11  13       57.20       98.42     84.72 o
 -12  11  13      782.35     1008.13    139.71 o
  -9  11  13       30.15       14.62     62.26 o
  -6  11  13     2206.32     2391.16    176.63 o
  -3  11  13     1503.79     1400.04    144.75 o
   0  11  13     1165.15     1625.55    169.63 o
   3  11  13     5204.84     4837.50    280.47 o
   6  11  13      954.52      819.81    150.50 o
   9  11  13     1947.24     2503.00    339.65 o
 -23  12  13     6094.19     6336.09    379.65 o
 -20  12  13     2422.78     2520.86    241.40 o
 -17  12  13       42.89       75.92     85.98 o
 -14  12  13       45.36      121.37     88.38 o
 -11  12  13     1154.34      888.86    125.31 o
  -8  12  13    17118.45    17639.30    396.03 o
  -5  12  13     4688.83     4260.49    215.08 o
  -2  12  13     8731.52     7733.74    291.53 o
   1  12  13     3484.57     3929.89    293.09 o
   4  12  13    22586.52    21076.54    699.72 o
   7  12  13     2030.72     1921.01    212.24 o
  10  12  13     3215.03     2707.16    275.31 o
 -25  13  13     6901.48     7670.52    582.03 o
 -22  13  13     4533.80     5301.34    349.05 o
 -19  13  13      190.51       79.68     91.40 o
 -16  13  13      695.56      350.47    114.39 o
 -13  13  13     8685.63     8907.99    319.21 o
 -10  13  13      721.54      837.26    125.10 o
  -7  13  13    11220.17    10150.08    340.94 o
  -4  13  13    24784.68    24740.39    929.77 o
  -1  13  13      159.23       65.46     71.91 o
   2  13  13    21129.59    20776.47    717.77 o
   5  13  13     9967.24    11411.37    544.80 o
   8  13  13     1201.16     1292.79    181.06 o
  11  13  13     3552.98     3333.45    303.29 o
 -27  14  13        2.18       51.63    139.16 o
 -24  14  13     5960.75     6561.24    538.31 o
 -21  14  13     1826.06     1593.61    201.71 o
 -18  14  13      424.23      440.69    122.88 o
 -15  14  13     5372.60     6830.81    317.62 o
 -12  14  13      299.36      590.55    110.58 o
  -9  14  13     1071.26      669.63    117.48 o
  -6  14  13    10725.56    11551.71    419.68 o
  -3  14  13     7482.45     7538.05    360.85 o
   0  14  13    11224.57     9777.34    626.38 o
   3  14  13    44884.81    43535.29   1261.64 o
   6  14  13       57.28        3.72     80.59 o
   9  14  13        1.27      -36.21     78.75 o
  12  14  13      431.37      426.48    160.33 o
 -29  15  13     1057.09     1140.74    236.84 o
 -26  15  13     1905.45     1590.42    258.90 o
 -23  15  13     3356.35     3198.92    298.65 o
 -20  15  13     2748.11     2389.52    237.51 o
 -17  15  13       89.42      121.35     95.02 o
 -14  15  13    35478.78    36568.78    703.50 o
 -11  15  13      306.07      287.56     89.55 o
  -8  15  13     1426.61     1732.08    165.47 o
  -5  15  13    12692.03    12023.89    370.10 o
  -2  15  13      133.94      252.29    113.69 o
   1  15  13    35838.05    35131.61   1455.79 o
   4  15  13     4638.95     4660.94    309.13 o
   7  15  13      641.96      653.70    161.23 o
  10  15  13      435.30      466.84    155.29 o
  13  15  13      280.39      130.84    130.43 o
 -31  16  13       10.52       84.60    123.57 o
 -28  16  13      628.17      236.40    135.58 o
 -25  16  13     2046.86     2011.24    286.37 o
 -22  16  13     2122.47     2030.71    226.05 o
 -19  16  13     1229.00     1459.96    194.09 o
 -16  16  13    13110.71    14705.15    463.04 o
 -13  16  13    26152.59    24941.85    685.27 o
 -10  16  13     2286.61     2147.20    180.53 o
  -7  16  13     1276.32     1547.16    170.61 o
  -4  16  13      194.39      128.10     90.31 o
  -1  16  13       27.22      113.02     87.77 o
   2  16  13    15266.74    15598.28    710.48 o
   5  16  13      122.65       92.09     98.33 o
   8  16  13     4428.70     4184.60    306.04 o
  11  16  13     1175.89     1049.92    205.05 o
  14  16  13        3.10      -38.27     96.07 o
 -33  17  13       34.75       34.26    120.85 o
 -30  17  13     1524.33     1755.28    285.01 o
 -27  17  13       63.56       12.94    110.00 o
 -24  17  13     1400.44      995.30    219.41 o
 -21  17  13       44.40       -1.11     82.04 o
 -18  17  13      825.22     1136.16    177.15 o
 -15  17  13    38929.91    37786.14   1739.47 o
 -12  17  13       24.83       58.94     76.39 o
  -9  17  13    11506.42    10782.96    358.10 o
  -6  17  13     1913.54     1833.62    204.32 o
  -3  17  13      393.89      250.25    107.21 o
   0  17  13     3901.54     3404.05    291.88 o
   3  17  13       50.64       76.70     95.63 o
   6  17  13     2018.91     1902.02    226.38 o
   9  17  13     5254.36     5458.99    344.42 o
  12  17  13        4.09       -6.51    107.39 o
  15  17  13       63.31       42.34    122.77 o
 -32  18  13     1176.95     1288.87    256.98 o
 -29  18  13     3765.00     3372.55    364.48 o
 -26  18  13        1.35      123.07    116.40 o
 -23  18  13       25.08       79.48    104.68 o
 -20  18  13      178.52      146.61    103.51 o
 -17  18  13     5644.30     7189.42    382.66 o
 -14  18  13    14350.07    14991.41    714.09 o
 -11  18  13      494.15      302.01    103.12 o
  -8  18  13    11829.01    11747.68    414.45 o
  -5  18  13     4438.54     4365.83    286.59 o
  -2  18  13      120.49      185.93     98.53 o
   1  18  13     3394.38     3721.92    280.60 o
   4  18  13       25.27       84.04     91.81 o
   7  18  13     8727.19    10502.98    509.76 o
  10  18  13     2341.65     2371.83    280.42 o
  13  18  13       19.73       -5.41    112.71 o
  16  18  13        9.19      -72.08    161.30 o
 -31  19  13     2493.34     2808.25    347.98 o
 -28  19  13     3029.90     3360.88    360.32 o
 -25  19  13       48.24       49.98    112.72 o
 -22  19  13     1563.00     1804.35    241.71 o
 -19  19  13      579.92      227.48    117.69 o
 -16  19  13     7735.33     7897.29    334.91 o
 -13  19  13       36.90        3.11     73.15 o
 -10  19  13     4048.34     4095.72    279.68 o
  -7  19  13    30248.21    30261.21    932.01 o
  -4  19  13      382.95      487.16    128.81 o
  -1  19  13     1658.41     1495.56    199.47 o
   2  19  13       52.70        2.31     81.16 o
   5  19  13     2082.49     2180.21    242.00 o
   8  19  13     5482.15     5271.34    343.68 o
  11  19  13      103.33      161.82    125.81 o
  14  19  13      282.46      220.20    150.15 o
 -33  20  13     2681.28     2407.32    329.25 o
 -30  20  13     2202.93     2424.18    318.62 o
 -27  20  13      164.25      108.84    123.90 o
 -24  20  13     2937.56     2247.64    271.04 o
 -21  20  13     1614.26     1569.10    206.83 o
 -18  20  13      984.98      922.02    152.38 o
 -15  20  13      632.45      635.79    157.10 o
 -12  20  13      834.03      923.39    163.67 o
  -9  20  13    17542.64    18335.89   1033.20 o
  -6  20  13     2065.33     1601.22    198.65 o
  -3  20  13      149.70       70.72     85.01 o
   0  20  13      535.42      365.29    121.78 o
   3  20  13        0.44      -47.36     75.49 o
   6  20  13      823.67      846.50    169.63 o
   9  20  13     2000.81     1716.10    250.81 o
  12  20  13        6.71       43.24    118.09 o
 -32  21  13     2031.34     2225.99    320.75 o
 -29  21  13      668.98      737.32    200.82 o
 -26  21  13      728.79      448.08    168.84 o
 -23  21  13     9548.47    10630.67    745.16 o
 -20  21  13     1223.55     1474.92    202.20 o
 -17  21  13     1224.93     1732.26    213.68 o
 -14  21  13      452.74      335.38    112.99 o
 -11  21  13     1351.80     1828.93    212.24 o
  -8  21  13    18346.95    19369.50   1014.53 o
  -5  21  13       44.21      -43.76     72.27 o
  -2  21  13       69.12      -35.10     74.89 o
   1  21  13      243.98      270.52    112.84 o
   4  21  13       27.46       26.31     91.12 o
   7  21  13      533.89      630.79    154.37 o
  10  21  13       14.41      107.82    133.76 o
 -31  22  13       17.62       57.76    121.99 o
 -28  22  13      116.05       69.22    124.81 o
 -25  22  13     3404.47     3549.89    329.21 o
 -22  22  13     5704.89     5518.97    378.97 o
 -19  22  13      629.50      598.67    144.52 o
 -16  22  13      849.39     1155.53    222.20 o
 -13  22  13       64.11       82.90     86.82 o
 -10  22  13    10579.14    11529.83    571.87 o
  -7  22  13      113.83       55.17     85.43 o
  -4  22  13      114.01      125.54     93.60 o
  -1  22  13      326.64      287.30    120.20 o
   2  22  13       10.44      -48.82     76.89 o
   5  22  13      455.99      715.19    159.85 o
   8  22  13        8.95       28.46     97.17 o
  11  22  13       85.64      115.26    142.50 o
 -33  23  13       77.59       14.74    134.61 o
 -30  23  13      327.30      256.51    150.95 o
 -27  23  13     1453.08     1095.59    263.04 o
 -24  23  13     1756.32     2070.08    262.99 o
 -21  23  13        3.28      -54.88     91.11 o
 -18  23  13      349.57      511.86    128.92 o
 -15  23  13      377.08       85.77     98.61 o
 -12  23  13       44.28       11.70     81.88 o
  -9  23  13       31.99      150.66     98.53 o
  -6  23  13     1865.94     1762.75    210.16 o
  -3  23  13      107.74       86.46     92.42 o
   0  23  13      300.84      423.42    127.22 o
   3  23  13      662.23      840.77    171.30 o
   6  23  13      154.28      133.75    104.41 o
   9  23  13      303.04      258.35    141.16 o
 -32  24  13      221.94      238.31    151.21 o
 -29  24  13       48.20      111.32    124.53 o
 -26  24  13     1569.99     1605.20    275.03 o
 -23  24  13       27.40       -5.38    101.63 o
 -20  24  13      265.85      355.62    133.12 o
 -17  24  13      171.24       84.94    113.39 o
 -14  24  13       71.93       44.30     89.25 o
 -11  24  13        5.32      -19.45     78.70 o
  -8  24  13     2217.37     2192.78    234.75 o
  -5  24  13      754.13      576.92    142.63 o
  -2  24  13      477.05      227.73    114.20 o
   1  24  13      215.66      134.40    101.35 o
   4  24  13       17.69      -27.23     84.01 o
   7  24  13       56.64      102.95    115.33 o
 -31  25  13        8.40      -33.49    110.35 o
 -28  25  13      249.28      188.65    156.48 o
 -25  25  13       11.54      -57.60     91.33 o
 -22  25  13      852.76      685.75    198.20 o
 -19  25  13      122.09      152.72    123.21 o
 -16  25  13      229.82       67.92     95.67 o
 -13  25  13      685.08      621.98    145.83 o
 -10  25  13      194.62      193.41    106.21 o
  -7  25  13     4383.25     4475.28    313.00 o
  -4  25  13        4.02      -42.49     79.75 o
  -1  25  13      809.57      832.25    170.18 o
   2  25  13      786.27     1092.91    191.98 o
   5  25  13     1790.28     2085.78    253.56 o
 -30  26  13      132.15      118.18    149.15 o
 -27  26  13        3.62      -92.17     92.17 o
 -24  26  13     2305.74     2585.45    327.97 o
 -21  26  13     1164.63     1289.61    246.77 o
 -18  26  13      316.65      429.02    156.22 o
 -15  26  13       66.95       12.34     92.28 o
 -12  26  13        5.59       10.64     80.29 o
  -9  26  13      713.87      761.82    160.31 o
  -6  26  13     1125.90     1386.12    203.34 o
  -3  26  13      667.31      698.09    159.82 o
   0  26  13     2895.93     3511.84    298.44 o
   3  26  13     1660.74     1869.40    233.63 o
   6  26  13     2048.89     2360.53    385.83 o
 -29  27  13        5.55       54.68    134.59 o
 -26  27  13        0.33      -28.96    114.56 o
 -23  27  13     1926.83     1965.50    336.13 o
 -20  27  13     1307.56     1087.52    222.51 o
 -17  27  13        8.23        3.39    103.94 o
 -14  27  13       70.88      -55.66     78.13 o
 -11  27  13     1781.08     1702.09    222.23 o
  -8  27  13      374.44      476.27    136.30 o
  -5  27  13      998.87     1125.77    195.33 o
  -2  27  13     5034.10     5687.89    398.43 o
   1  27  13      321.66      165.04    114.36 o
   4  27  13     4542.56     4393.44    344.49 o
 -28  28  13        3.89       20.02    117.61 o
 -25  28  13      117.59       26.25    120.53 o
 -22  28  13     1821.99     1917.82    294.24 o
 -19  28  13     1226.95     1370.69    291.09 o
 -16  28  13      434.53      303.13    143.49 o
 -13  28  13     3231.57     3508.86    296.44 o
 -10  28  13     4691.92     4424.58    384.00 o
  -7  28  13     2753.50     2818.48    280.20 o
  -4  28  13     4155.75     5211.32    368.77 o
  -1  28  13     4983.31     5588.98    370.13 o
   2  28  13     1439.95     1622.54    233.38 o
 -27  29  13     1302.81     1660.17    290.68 o
 -24  29  13      547.48      679.02    226.73 o
 -21  29  13     2193.69     2583.49    457.86 o
 -18  29  13     2110.97     2308.89    310.81 o
 -15  29  13       57.77      110.95    111.47 o
 -12  29  13     9094.29     9698.32    761.67 o
  -9  29  13       95.44      261.15    116.89 o
  -6  29  13     1944.78     2200.44    249.68 o
  -3  29  13     3936.38     4401.26    424.06 o
   0  29  13      290.84      333.40    136.81 o
 -26  30  13      855.45      850.88    245.44 o
 -23  30  13     2690.15     2548.23    338.14 o
 -20  30  13     3357.77     3600.35    445.26 o
 -17  30  13     1595.23     2154.82    305.03 o
 -14  30  13     2743.23     2682.52    304.09 o
 -11  30  13     3994.17     3715.75    311.00 o
  -8  30  13      192.49      176.47    111.21 o
  -5  30  13     1603.71     1812.01    239.66 o
  -2  30  13      186.88      151.93    114.14 o
 -25  31  13      125.26      290.25    178.98 o
 -22  31  13     3003.98     2658.13    336.72 o
 -19  31  13     2337.90     1945.46    298.31 o
 -16  31  13        0.28      -64.77     88.97 o
 -13  31  13     4778.07     4567.23    420.62 o
 -10  31  13       53.96      -11.68     87.14 o
  -7  31  13        8.81      -22.93     86.96 o
  -4  31  13      239.94       73.32    108.62 o
 -24  32  13      572.87      599.80    188.04 o
 -21  32  13      922.84      600.99    215.90 o
 -18  32  13       36.23      -23.74    100.98 o
 -15  32  13     1312.86     1519.38    243.59 o
 -12  32  13     1551.82     1366.44    232.56 o
  -9  32  13        5.78      -17.36     96.12 o
  -6  32  13     1875.31     2391.83    276.21 o
 -23  33  13        1.12       45.36    142.49 o
 -20  33  13      214.21      143.50    135.19 o
 -17  33  13      870.76     1255.89    255.03 o
 -14  33  13     2651.06     2757.28    343.30 o
 -11  33  13      331.90      247.58    143.32 o
 -16  34  13      714.44      479.83    248.98 o
   0   1  14   169966.19   172162.84   2404.83 o
  -2   2  14    83490.76    86769.23    809.54 o
   1   2  14    28634.09    28304.29    469.47 o
  -4   3  14     4448.55     3595.67    215.73 o
  -1   3  14    31140.23    32608.29    505.78 o
   2   3  14      822.82      330.97     84.53 o
  -6   4  14      276.34      185.34     81.60 o
  -3   4  14     6610.71     7100.01    294.10 o
   0   4  14       78.23      -37.93     58.09 o
   3   4  14     2681.57     2278.66    182.98 o
  -8   5  14       75.72      134.41     79.17 o
  -5   5  14     1956.84     1981.51    174.95 o
  -2   5  14       10.78       10.41     60.02 o
   1   5  14     8215.63     8711.54    274.00 o
   4   5  14      878.56     1281.70    164.74 o
 -10   6  14      990.36     2384.22    211.58 o
  -7   6  14      128.40       72.80     72.10 o
  -4   6  14      876.91      962.60    124.01 o
  -1   6  14     1960.53     1563.32    146.98 o
   2   6  14     1092.31     1068.01    128.32 o
   5   6  14     1622.45     2642.21    223.61 o
 -12   7  14       75.27      -22.31     71.03 o
  -9   7  14     2503.16     3098.21    212.00 o
  -6   7  14      541.12      499.34     99.45 o
  -3   7  14       26.59       54.79     63.47 o
   0   7  14     4144.94     3948.41    210.18 o
   3   7  14       13.67       22.68     68.46 o
   6   7  14      119.98      215.34     98.48 o
 -14   8  14     2441.86     2815.30    234.11 o
 -11   8  14      658.55      616.26    131.23 o
  -8   8  14     5312.23     5658.71    255.95 o
  -5   8  14      127.31      -20.60     58.19 o
  -2   8  14      101.27      338.24     91.12 o
   1   8  14     4499.54     3842.00    230.55 o
   4   8  14     1324.06      922.44    138.03 o
   7   8  14     9470.24     8954.98    358.65 o
 -16   9  14     1317.13      878.58    151.95 o
 -13   9  14     2340.52     3128.42    243.05 o
 -10   9  14     2919.19     3684.19    228.57 o
  -7   9  14    15856.39    15602.20    372.48 o
  -4   9  14     6671.96     6562.60    248.78 o
  -1   9  14      409.19      330.36     96.33 o
   2   9  14     3004.07     2876.89    209.83 o
   5   9  14     5786.20     4719.70    295.35 o
   8   9  14     7207.89     8101.74    351.03 o
 -18  10  14      132.04      244.70    110.85 o
 -15  10  14      138.81       12.02     83.35 o
 -12  10  14     4283.38     4802.94    286.26 o
  -9  10  14     8715.77     9831.20    303.14 o
  -6  10  14        2.01       64.65     69.30 o
  -3  10  14      350.83      355.75     95.66 o
   0  10  14     3980.79     3759.34    233.48 o
   3  10  14      447.23      783.95    133.88 o
   6  10  14     3914.03     4275.21    283.59 o
   9  10  14      773.38      829.60    171.56 o
 -20  11  14     1651.00     1754.69    234.94 o
 -17  11  14     1019.51      576.56    135.72 o
 -14  11  14     8077.28     8806.91    355.96 o
 -11  11  14     1348.35      594.33    135.09 o
  -8  11  14    14242.63    14519.32    367.72 o
  -5  11  14    27606.51    26830.05    828.47 o
  -2  11  14      966.62     1063.18    147.47 o
   1  11  14      304.26      247.09     96.08 o
   4  11  14     6940.35     7900.43    313.38 o
   7  11  14      809.73     1242.95    201.16 o
  10  11  14        1.26       65.11    100.54 o
 -22  12  14      235.84      365.78    134.19 o
 -19  12  14      490.77      341.16    118.57 o
 -16  12  14     1025.72     1049.10    165.82 o
 -13  12  14      120.31      219.67    103.32 o
 -10  12  14     7333.97     6933.62    262.84 o
  -7  12  14     1847.63     2246.36    181.12 o
  -4  12  14       65.26       36.65     74.44 o
  -1  12  14      454.78      413.33    106.29 o
   2  12  14    17739.13    19191.62    741.65 o
   5  12  14    11540.85    12394.08    429.50 o
   8  12  14      508.83      545.43    150.48 o
  11  12  14     1995.43     2398.71    268.10 o
 -24  13  14     1651.42     1425.80    224.35 o
 -21  13  14      374.28      540.55    151.54 o
 -18  13  14       50.99      132.91     94.06 o
 -15  13  14        6.41      -71.60     71.60 o
 -12  13  14     2349.97     2123.03    216.13 o
  -9  13  14      520.92      319.70     94.90 o
  -6  13  14     2626.29     2394.05    185.32 o
  -3  13  14     1814.96     1281.89    157.96 o
   0  13  14     4491.56     4744.49    267.18 o
   3  13  14    44169.48    46081.61   1371.09 o
   6  13  14     2693.65     2800.70    252.62 o
   9  13  14       54.45      127.28    105.65 o
  12  13  14     1518.52     1618.68    236.17 o
 -26  14  14      147.45      130.97    125.18 o
 -23  14  14      134.62       -5.01     88.36 o
 -20  14  14      349.62      380.46    122.52 o
 -17  14  14      384.79      287.78    112.76 o
 -14  14  14    14355.88    11343.90    408.00 o
 -11  14  14      188.09      217.59     90.32 o
  -8  14  14      435.29      428.49    111.15 o
  -5  14  14     7059.83     7282.33    295.55 o
  -2  14  14       11.74        4.43     77.23 o
   1  14  14    41518.49    41295.02   1543.83 o
   4  14  14    29064.36    29429.54   1528.51 o
   7  14  14      628.22      769.49    170.96 o
  10  14  14      318.08      285.10    129.84 o
  13  14  14      110.94      133.91    142.58 o
 -28  15  14     1297.64     1183.80    280.42 o
 -25  15  14      111.48      118.37    109.76 o
 -22  15  14     1677.34     1380.73    217.42 o
 -19  15  14       43.73       40.69     89.49 o
 -16  15  14    10625.92    11325.05    737.60 o
 -13  15  14    36939.61    37852.18   1133.11 o
 -10  15  14      142.49      -32.08     61.34 o
  -7  15  14     1361.84     1266.08    163.91 o
  -4  15  14     1218.44     1017.31    176.37 o
  -1  15  14     4477.46     4874.11    301.60 o
   2  15  14    55914.01    55962.86   3188.10 o
   5  15  14     7037.88     7082.85    361.84 o
   8  15  14      836.82     1049.82    261.13 o
  11  15  14        1.30      -28.59     96.37 o
  14  15  14      370.43      349.76    156.12 o
 -30  16  14     1405.87     1173.81    241.40 o
 -27  16  14      679.33      450.66    169.74 o
 -24  16  14      724.29      859.19    175.91 o
 -21  16  14      436.43      550.66    146.10 o
 -18  16  14     1379.70     1888.19    218.08 o
 -15  16  14    44590.75    45685.73   1512.94 o
 -12  16  14    14226.68    14931.77    397.15 o
  -9  16  14      438.30      485.70    119.87 o
  -6  16  14     4220.80     5891.18    314.81 o
  -3  16  14       66.89       45.19     81.45 o
   0  16  14    18224.63    19150.33    867.45 o
   3  16  14    10978.00    10967.54    474.75 o
   6  16  14      177.82      251.85    111.06 o
   9  16  14     1276.51     1392.96    228.02 o
  12  16  14      463.21      456.98    171.56 o
  15  16  14       17.80       -7.79    120.12 o
 -32  17  14     1194.54     1006.18    232.91 o
 -29  17  14     3628.76     3853.01    386.66 o
 -26  17  14      320.72      147.53    125.48 o
 -23  17  14     3483.10     4117.73    335.31 o
 -20  17  14       60.71       45.77     88.76 o
 -17  17  14    18485.62    19544.04    653.30 o
 -14  17  14    42202.02    44291.59   1434.27 o
 -11  17  14      561.91      538.57    115.23 o
  -8  17  14      113.93      154.12     93.22 o
  -5  17  14      445.93      310.11    116.61 o
  -2  17  14       86.14      113.39     89.46 o
   1  17  14    14777.81    15349.30    579.87 o
   4  17  14      150.01      145.80    102.10 o
   7  17  14     1851.04     2126.77    238.12 o
  10  17  14      119.18       79.54    110.78 o
  13  17  14      508.35      491.92    176.37 o
  16  17  14        5.07      -63.05    114.02 o
 -31  18  14     3960.93     3889.50    395.73 o
 -28  18  14     4005.61     4892.26    423.66 o
 -25  18  14      771.23      746.57    195.89 o
 -22  18  14      237.46      148.77    108.56 o
 -19  18  14     1377.22     1558.15    205.15 o
 -16  18  14    34596.38    35899.60   1118.50 o
 -13  18  14     5489.34     5843.47    293.28 o
 -10  18  14       34.46      -67.55     67.55 o
  -7  18  14     3183.19     3991.91    280.89 o
  -4  18  14      764.23     1066.57    174.26 o
  -1  18  14     3156.61     3296.37    271.09 o
   2  18  14     3037.66     2319.72    234.57 o
   5  18  14      187.22      177.05    100.61 o
   8  18  14      328.62      242.85    132.09 o
  11  18  14      217.31       94.91    130.32 o
  14  18  14      293.32      329.19    161.25 o
 -30  19  14     3642.54     3831.83    389.57 o
 -27  19  14      353.91      269.51    147.81 o
 -24  19  14     1243.40      830.96    198.61 o
 -21  19  14      433.15      333.45    121.67 o
 -18  19  14     3789.83     4640.24    312.68 o
 -15  19  14    13188.21    12608.38    412.08 o
 -12  19  14      356.95      493.41    128.79 o
  -9  19  14      208.94       53.01     87.91 o
  -6  19  14      348.05      415.23    128.36 o
  -3  19  14      230.44      135.07     95.08 o
   0  19  14     5492.71     6293.70    339.59 o
   3  19  14       65.34       82.09     91.66 o
   6  19  14      177.90      121.10    103.02 o
   9  19  14      124.62      166.15    122.88 o
  12  19  14     1568.35     1985.83    305.45 o
 -32  20  14     5748.26     6269.75    482.71 o
 -29  20  14     1003.63     1113.09    236.97 o
 -26  20  14       85.59       97.38    121.37 o
 -23  20  14       70.08      126.91    121.28 o
 -20  20  14      171.57      155.28    108.46 o
 -17  20  14     6953.80     7345.79    355.99 o
 -14  20  14        2.41      -11.69     88.53 o
 -11  20  14     2372.31     2688.77    249.15 o
  -8  20  14     6384.57     6540.62    357.97 o
  -5  20  14     1740.54     1305.79    186.05 o
  -2  20  14     1044.06     1070.02    175.92 o
   1  20  14      432.97      425.87    130.92 o
   4  20  14        1.95       44.20     90.70 o
   7  20  14       25.77      -24.12     86.61 o
  10  20  14      410.73      664.29    199.52 o
 -31  21  14     1531.13     1358.51    258.39 o
 -28  21  14      688.59      909.98    218.46 o
 -25  21  14      398.52      528.66    174.20 o
 -22  21  14     1760.26     1796.38    247.26 o
 -19  21  14     1586.42     1651.49    214.50 o
 -16  21  14     3201.04     3395.20    317.73 o
 -13  21  14      891.00     1166.58    181.88 o
 -10  21  14      258.27       86.98     93.88 o
  -7  21  14       37.96       61.45     92.09 o
  -4  21  14      660.28      551.56    139.31 o
  -1  21  14      941.65     1015.30    177.35 o
   2  21  14       63.01      103.45    100.39 o
   5  21  14     1300.79     1495.38    214.08 o
   8  21  14      162.75      165.39    124.08 o
  11  21  14      935.62     1075.48    239.50 o
 -30  22  14      530.31      527.82    180.64 o
 -27  22  14      449.22      472.93    175.71 o
 -24  22  14     1084.43      769.18    183.52 o
 -21  22  14      737.63      789.04    201.24 o
 -18  22  14     2021.78     1972.47    255.01 o
 -15  22  14     1642.44     1598.50    227.21 o
 -12  22  14     2176.81     2668.20    284.05 o
  -9  22  14      324.04      242.42    111.87 o
  -6  22  14      941.89     1099.60    179.58 o
  -3  22  14      366.64      413.87    124.30 o
   0  22  14      109.85      179.29    104.88 o
   3  22  14      176.35      192.39    112.29 o
   6  22  14      212.46      140.06    104.00 o
   9  22  14     1121.86     1180.74    247.09 o
 -32  23  14      594.00      600.69    194.12 o
 -29  23  14     2259.82     2499.28    323.68 o
 -26  23  14      544.02      518.39    179.84 o
 -23  23  14       86.68      102.23    119.59 o
 -20  23  14      171.43      329.64    152.12 o
 -17  23  14      907.35     1144.90    201.48 o
 -14  23  14      998.51     1184.89    201.54 o
 -11  23  14     1027.08     1333.58    196.19 o
  -8  23  14     1276.58     1443.02    202.04 o
  -5  23  14     1621.33     1624.98    207.38 o
  -2  23  14     1853.23     2167.92    239.02 o
   1  23  14       32.59       25.44     94.17 o
   4  23  14      358.57      194.00    113.15 o
   7  23  14      488.54      565.45    171.54 o
 -31  24  14        3.72      146.88    136.40 o
 -28  24  14      264.84      484.55    174.95 o
 -25  24  14        5.82       -6.52    111.36 o
 -22  24  14      927.50      849.86    207.04 o
 -19  24  14        7.03      -48.82    104.93 o
 -16  24  14     1677.17     2315.96    272.80 o
 -13  24  14      657.27      600.98    145.18 o
 -10  24  14      777.97      739.99    157.26 o
  -7  24  14     8187.87     8847.11    395.47 o
  -4  24  14      517.23      316.93    126.05 o
  -1  24  14        4.45      -41.38     76.72 o
   2  24  14      495.98      532.11    148.31 o
   5  24  14      172.14      275.71    124.30 o
 -30  25  14      350.52      362.86    189.62 o
 -27  25  14        2.63      -78.35    113.11 o
 -24  25  14     2851.89     3087.67    353.89 o
 -21  25  14      292.02      280.63    167.76 o
 -18  25  14      833.91      860.94    202.73 o
 -15  25  14       41.93      182.43    112.65 o
 -12  25  14      852.76      761.55    162.46 o
  -9  25  14     1622.78     1841.05    230.72 o
  -6  25  14     1708.71     1232.66    195.88 o
  -3  25  14       98.84       29.98     91.03 o
   0  25  14      594.57      603.03    155.25 o
   3  25  14       21.70       -0.09     89.85 o
   6  25  14      125.78      249.70    138.83 o
 -29  26  14      512.67      221.52    163.84 o
 -26  26  14       65.47       67.25    132.87 o
 -23  26  14     4212.56     4646.79    473.64 o
 -20  26  14        0.11       36.36    130.34 o
 -17  26  14      782.16      761.35    194.37 o
 -14  26  14      558.49      344.35    132.52 o
 -11  26  14      122.94       40.01     96.34 o
  -8  26  14     1106.32     1211.43    197.14 o
  -5  26  14      179.88      154.59    104.68 o
  -2  26  14      833.79      893.69    179.62 o
   1  26  14      987.35     1139.15    198.53 o
   4  26  14     1414.63     1483.72    221.17 o
 -28  27  14      767.83      489.67    205.94 o
 -25  27  14      444.04      347.02    159.96 o
 -22  27  14     2113.44     1987.97    343.12 o
 -19  27  14      324.84      200.23    142.60 o
 -16  27  14      420.37      599.89    186.11 o
 -13  27  14       11.19      -53.77     79.58 o
 -10  27  14       95.04      226.51    116.26 o
  -7  27  14      728.49      797.51    170.37 o
  -4  27  14      645.71      611.26    154.61 o
  -1  27  14     2279.42     2765.62    281.65 o
   2  27  14      949.59      978.88    209.98 o
 -27  28  14        0.23       26.38    125.97 o
 -24  28  14      713.78      889.60    254.55 o
 -21  28  14      286.61      126.18    149.34 o
 -18  28  14      350.40      556.38    186.57 o
 -15  28  14      771.31      801.09    205.63 o
 -12  28  14     2489.53     1804.72    230.31 o
  -9  28  14      162.20      192.71    110.17 o
  -6  28  14      303.57      376.60    135.42 o
  -3  28  14     1223.62     1234.33    204.19 o
   0  28  14      296.87      410.15    140.19 o
 -26  29  14      603.32      378.89    191.86 o
 -23  29  14      906.29      737.89    231.29 o
 -20  29  14      329.74      244.07    141.81 o
 -17  29  14     1211.53      840.70    210.51 o
 -14  29  14      863.75      499.69    162.27 o
 -11  29  14     6025.05     6587.91    392.36 o
  -8  29  14       68.96      -63.44     82.79 o
  -5  29  14      901.48      645.40    160.07 o
  -2  29  14      511.97      342.57    138.75 o
 -25  30  14      549.94      275.44    168.97 o
 -22  30  14      566.33      125.13    141.29 o
 -19  30  14      949.78      855.24    217.05 o
 -16  30  14        6.44      221.29    139.32 o
 -13  30  14     6146.96     7365.36    595.28 o
 -10  30  14     1987.32     1379.24    212.83 o
  -7  30  14        1.11       71.67    102.25 o
  -4  30  14       59.03        9.66     87.53 o
 -24  31  14        8.29       -5.98    126.59 o
 -21  31  14      667.60      635.18    193.27 o
 -18  31  14      325.12      146.54    134.73 o
 -15  31  14     2081.62     2411.35    323.35 o
 -12  31  14     5805.90     6873.99    445.51 o
  -9  31  14      530.59      462.51    146.19 o
  -6  31  14      577.74      874.45    182.23 o
 -23  32  14      154.32      260.96    152.46 o
 -20  32  14       30.13       52.13    118.49 o
 -17  32  14      725.89     1027.18    238.30 o
 -14  32  14     4150.85     4954.78    391.32 o
 -11  32  14     2025.66     2405.23    303.10 o
 -16  33  14     1540.42     1646.77    327.12 o
   0   0  15   146632.81   145531.13   2284.73 o
   1   1  15    49827.07    47641.65    814.79 o
  -1   2  15    49297.98    44324.21    661.99 o
   2   2  15       83.16      159.13     82.56 o
  -3   3  15     7327.72     6168.40    263.42 o
   0   3  15     5824.93     4763.94    246.43 o
   3   3  15     1909.60     3141.69    214.53 o
  -5   4  15       26.65        4.95     66.53 o
  -2   4  15     4776.29     3107.43    192.43 o
   1   4  15     1111.21     1992.09    182.24 o
   4   4  15      979.47     1618.21    165.96 o
  -7   5  15       80.64       -1.47     67.53 o
  -4   5  15     1353.36     1576.55    167.00 o
  -1   5  15     2522.04     1835.33    161.45 o
   2   5  15     4571.72     6107.71    264.01 o
   5   5  15      165.85      522.89    123.42 o
  -9   6  15      918.76      666.54    135.26 o
  -6   6  15      568.78      623.73    120.77 o
  -3   6  15     1893.86     2206.15    172.92 o
   0   6  15       24.52      -15.21     57.44 o
   3   6  15     3619.73     3092.99    241.13 o
   6   6  15     2167.79     3481.63    256.41 o
 -11   7  15        0.78      -13.67     71.07 o
  -8   7  15     3998.97     4981.97    259.97 o
  -5   7  15     2096.00     1497.27    166.10 o
  -2   7  15     6210.68     6050.74    246.13 o
   1   7  15     3316.91     3205.09    219.40 o
   4   7  15      127.20      148.21     93.76 o
   7   7  15     8848.06     9911.56    437.25 o
 -13   8  15     2566.84     2899.05    241.04 o
 -10   8  15      630.64      823.96    147.75 o
  -7   8  15     7456.11    10123.15    528.63 o
  -4   8  15    24890.61    25129.37    479.62 o
  -1   8  15      441.69      229.54     85.08 o
   2   8  15     6754.99     7609.08    327.79 o
   5   8  15     6279.36     6733.24    317.45 o
   8   8  15     7354.84     6805.42    331.59 o
 -15   9  15     1956.91     1609.78    199.31 o
 -12   9  15     2630.50     2392.26    228.65 o
  -9   9  15    11405.73    11509.13    362.65 o
  -6   9  15      126.98      285.56     93.87 o
  -3   9  15    22715.19    20157.54    436.26 o
   0   9  15     2319.80     2213.24    195.96 o
   3   9  15     1544.46     1660.95    190.85 o
   6   9  15    10003.59    11607.74    542.50 o
   9   9  15     3578.65     3500.77    300.47 o
 -17  10  15     1108.97      755.57    150.62 o
 -14  10  15     3737.82     3996.46    275.92 o
 -11  10  15     7512.54     7630.38    333.62 o
  -8  10  15     8853.85     9656.01    404.42 o
  -5  10  15    40742.11    39331.37    697.23 o
  -2  10  15     3127.55     2779.08    212.83 o
   1  10  15     1715.94     2016.15    190.39 o
   4  10  15     2984.10     3349.70    259.36 o
   7  10  15     2256.06     1125.79    198.11 o
  10  10  15     8784.24     7508.68    391.32 o
 -19  11  15    15682.00    14603.05    497.23 o
 -16  11  15      522.83      863.44    156.90 o
 -13  11  15     4240.20     3783.06    270.68 o
 -10  11  15     9162.13    10978.32    395.42 o
  -7  11  15     2583.78     2981.98    203.78 o
  -4  11  15    32720.74    34575.58    966.60 o
  -1  11  15     1228.02     1031.89    153.25 o
   2  11  15     2162.15     2083.42    196.71 o
   5  11  15      717.56      663.20    159.47 o
   8  11  15     4832.87     4720.23    367.83 o
  11  11  15     2706.36     3367.34    308.47 o
 -21  12  15     7300.33     6933.14    599.00 o
 -18  12  15     4347.93     5381.08    325.22 o
 -15  12  15     2277.97     2879.34    249.70 o
 -12  12  15      839.90     1019.06    162.05 o
  -9  12  15     2569.69     2936.34    219.97 o
  -6  12  15     9843.97     8594.71    297.62 o
  -3  12  15     8803.33     7764.80    309.98 o
   0  12  15     1604.03     1322.49    166.26 o
   3  12  15    12951.48    13051.68    840.62 o
   6  12  15     5295.28     5588.28    421.22 o
   9  12  15     1999.63     1886.27    350.34 o
  12  12  15      161.84      205.66    123.45 o
 -23  13  15     1390.35     1043.04    199.65 o
 -20  13  15     5507.57     5756.40    344.29 o
 -17  13  15      410.03      272.64    108.97 o
 -14  13  15        7.73       54.36     91.60 o
 -11  13  15       99.47       40.22     89.45 o
  -8  13  15     7205.92     7489.22    283.97 o
  -5  13  15     2353.19     2413.44    210.93 o
  -2  13  15     3264.63     2639.78    218.39 o
   1  13  15    12587.20    11925.33    645.53 o
   4  13  15    15719.21    14285.38    679.61 o
   7  13  15     1907.23     2143.35    255.54 o
  10  13  15        9.56       -5.50     97.31 o
  13  13  15      178.34      294.72    134.15 o
 -25  14  15       13.38       -8.37     95.20 o
 -22  14  15     1109.65      908.63    188.95 o
 -19  14  15     5260.80     5585.55    330.65 o
 -16  14  15      382.61      301.60    118.03 o
 -13  14  15    10875.95    11961.64    425.16 o
 -10  14  15     9394.90     9504.50    321.11 o
  -7  14  15      493.31      595.69    126.17 o
  -4  14  15      236.20      290.18     99.22 o
  -1  14  15     2963.26     2922.61    247.17 o
   2  14  15    25405.65    23826.18   1523.18 o
   5  14  15     8013.56     6924.29    385.20 o
   8  14  15      366.12      254.02    124.42 o
  11  14  15      277.40      318.79    130.71 o
  14  14  15      334.39      224.29    166.08 o
 -27  15  15     1228.50     1074.53    229.24 o
 -24  15  15     1594.20     1297.77    217.68 o
 -21  15  15      160.83      156.28    107.36 o
 -18  15  15      423.50      670.87    146.82 o
 -15  15  15    13662.90    15006.28    529.11 o
 -12  15  15    20896.57    22897.11    767.20 o
  -9  15  15     4256.59     3865.84    255.21 o
  -6  15  15     4307.36     3685.80    268.05 o
  -3  15  15       74.21      -47.57     71.93 o
   0  15  15    16090.15    15857.95    615.17 o
   3  15  15    19300.54    18457.54    860.74 o
   6  15  15      834.11      550.05    149.82 o
   9  15  15      503.41      441.74    167.40 o
  12  15  15      439.06      337.42    145.07 o
  15  15  15      300.69      127.87    139.03 o
 -29  16  15     2628.19     2586.24    389.28 o
 -26  16  15     1385.10     1350.00    247.51 o
 -23  16  15       84.13        7.21     93.88 o
 -20  16  15      254.34      355.50    122.25 o
 -17  16  15     3430.10     2837.16    255.09 o
 -14  16  15    37852.94    40838.53    872.69 o
 -11  16  15     6589.65     6396.74    280.00 o
  -8  16  15        0.23       -7.36     73.09 o
  -5  16  15      457.33      403.47    120.94 o
  -2  16  15     3364.51     3300.75    292.13 o
   1  16  15    21049.78    20911.11   1266.75 o
   4  16  15     3817.80     4048.50    325.72 o
   7  16  15     1615.64     1777.97    244.01 o
  10  16  15      147.01       66.44    107.81 o
  13  16  15      736.89     1175.02    241.88 o
 -31  17  15     3512.40     3858.24    402.41 o
 -28  17  15     5630.54     5976.91    502.21 o
 -25  17  15       38.55      156.51    123.69 o
 -22  17  15        0.54      -75.88     75.88 o
 -19  17  15        9.00      -28.11     84.24 o
 -16  17  15    18153.68    17781.86    823.97 o
 -13  17  15    16727.33    16726.43    572.53 o
 -10  17  15     1684.54     2001.68    202.61 o
  -7  17  15      216.44      599.75    142.38 o
  -4  17  15      178.69      101.59     91.13 o
  -1  17  15     4998.19     5251.77    323.79 o
   2  17  15     3140.55     2941.16    268.78 o
   5  17  15       99.53      184.36    119.14 o
   8  17  15      742.99      539.66    161.78 o
  11  17  15      634.09      414.41    163.07 o
  14  17  15      761.42      932.61    227.80 o
 -30  18  15     3854.92     3667.28    459.54 o
 -27  18  15     1222.88     1231.22    241.52 o
 -24  18  15      168.50      -26.07    101.14 o
 -21  18  15      440.77      329.53    119.69 o
 -18  18  15     1246.69     1175.40    185.66 o
 -15  18  15    29763.21    33565.77    992.65 o
 -12  18  15       62.43       24.85     94.19 o
  -9  18  15     1112.73     1248.02    184.17 o
  -6  18  15      230.89      291.20    117.69 o
  -3  18  15      208.72      307.06    114.83 o
   0  18  15     2564.85     3159.14    273.10 o
   3  18  15        7.90        4.03     80.81 o
   6  18  15      216.34      229.82    124.53 o
   9  18  15        9.69      -11.30     98.14 o
  12  18  15     4221.34     5081.21    434.19 o
 -29  19  15     2330.72     1625.68    317.60 o
 -26  19  15      711.74      673.45    194.34 o
 -23  19  15       36.29       16.75     98.35 o
 -20  19  15        2.42      -12.04     83.09 o
 -17  19  15     5924.39     7602.52    366.04 o
 -14  19  15     6073.99     6545.97    384.69 o
 -11  19  15     2040.48     2417.20    244.40 o
  -8  19  15      835.99      548.11    138.56 o
  -5  19  15     2099.35     2184.24    233.57 o
  -2  19  15      277.64      198.45    100.11 o
   1  19  15       21.79       -5.31     85.77 o
   4  19  15      111.52      321.34    125.77 o
   7  19  15        0.46      -29.54     88.26 o
  10  19  15     2148.56     2170.21    314.51 o
 -31  20  15     4664.88     4938.56    438.12 o
 -28  20  15      168.70      244.24    147.68 o
 -25  20  15      107.73      170.24    132.59 o
 -22  20  15      577.10      509.97    155.87 o
 -19  20  15        7.42      -25.26     88.25 o
 -16  20  15     4446.60     4989.18    356.69 o
 -13  20  15      292.75      265.00    127.31 o
 -10  20  15     2620.48     3007.78    267.71 o
  -7  20  15      643.70      790.97    154.60 o
  -4  20  15     2080.73     2049.77    233.24 o
  -1  20  15      986.93      945.23    173.55 o
   2  20  15       25.84        3.61     85.11 o
   5  20  15      165.08       93.57    113.68 o
   8  20  15      863.94      898.64    198.63 o
  11  20  15     1925.66     2055.72    309.93 o
 -30  21  15      131.31       83.82    130.85 o
 -27  21  15     3707.47     3772.81    386.96 o
 -24  21  15      665.29      923.75    198.84 o
 -21  21  15       42.79       83.31    107.63 o
 -18  21  15      843.80      795.72    181.14 o
 -15  21  15      237.98      207.91    110.65 o
 -12  21  15     4715.27     5106.43    333.00 o
  -9  21  15      461.84      558.07    143.26 o
  -6  21  15     1085.29      799.94    162.11 o
  -3  21  15        0.32       -3.81     84.43 o
   0  21  15      269.78      214.28    112.90 o
   3  21  15       49.42       80.37    105.11 o
   6  21  15      523.50      525.09    164.40 o
   9  21  15     2853.85     3655.70    386.22 o
 -29  22  15     3620.41     3768.94    395.21 o
 -26  22  15      476.04      472.97    173.04 o
 -23  22  15      472.41      606.87    162.98 o
 -20  22  15      102.07       22.77     97.32 o
 -17  22  15     1175.28      948.13    213.20 o
 -14  22  15       10.94       18.72     90.57 o
 -11  22  15     3157.42     2797.84    264.64 o
  -8  22  15      572.15      441.07    133.18 o
  -5  22  15     1607.19     1399.82    197.79 o
  -2  22  15     2880.14     3323.45    286.41 o
   1  22  15      601.50      436.81    133.88 o
   4  22  15      594.51      628.26    159.53 o
   7  22  15     2072.98     2133.84    273.65 o
 -28  23  15     4018.64     4344.54    417.28 o
 -25  23  15      279.92       48.22    124.16 o
 -22  23  15      231.89      -91.60     95.74 o
 -19  23  15      471.96      166.17    131.78 o
 -16  23  15     2275.46     2746.10    339.18 o
 -13  23  15      868.00     1226.16    209.77 o
 -10  23  15     1662.25     1409.69    201.53 o
  -7  23  15     4080.99     4583.14    378.66 o
  -4  23  15      737.04      839.97    168.10 o
  -1  23  15     2842.60     2706.27    272.69 o
   2  23  15       69.11       98.07    102.91 o
   5  23  15      327.45      471.86    163.19 o
 -30  24  15     1165.15     1316.31    254.99 o
 -27  24  15      475.06      225.21    175.64 o
 -24  24  15      361.44      332.81    158.31 o
 -21  24  15       49.81       56.03    138.52 o
 -18  24  15     2896.97     2935.75    336.29 o
 -15  24  15     1286.51     1130.79    205.92 o
 -12  24  15      809.12      826.97    168.28 o
  -9  24  15     1918.61     2214.78    242.95 o
  -6  24  15     1293.24     1432.17    203.87 o
  -3  24  15     3141.71     3154.42    284.95 o
   0  24  15     1873.28     1272.22    224.52 o
   3  24  15       39.01      -17.70     89.70 o
   6  24  15      354.79      378.96    152.85 o
 -29  25  15      802.44      771.47    245.33 o
 -26  25  15      268.85       79.43    126.97 o
 -23  25  15     2049.52     2397.40    369.69 o
 -20  25  15      848.01      695.86    255.55 o
 -17  25  15     7598.63     8091.98    432.39 o
 -14  25  15       24.70       58.38    103.62 o
 -11  25  15     1060.57     1086.45    183.62 o
  -8  25  15     1514.77     1432.94    207.84 o
  -5  25  15       49.04       -6.12     85.09 o
  -2  25  15     3049.33     3336.18    295.00 o
   1  25  15      132.96       83.87    102.09 o
   4  25  15       68.03       51.55    101.89 o
 -28  26  15     1025.64      929.76    256.55 o
 -25  26  15      752.68      647.19    201.87 o
 -22  26  15      796.91      756.10    235.42 o
 -19  26  15     6853.79     7355.70    643.21 o
 -16  26  15     1739.41     1379.77    232.98 o
 -13  26  15      253.93      236.59    126.90 o
 -10  26  15      630.72      846.85    171.45 o
  -7  26  15       95.26       -2.24     89.81 o
  -4  26  15      936.46      894.60    179.71 o
  -1  26  15      119.30      128.20    113.66 o
   2  26  15       44.69      106.94    108.71 o
 -27  27  15      768.67      843.83    251.84 o
 -24  27  15      499.85      583.27    224.72 o
 -21  27  15      294.01      467.67    206.15 o
 -18  27  15     5437.61     5477.60    441.78 o
 -15  27  15      279.44      243.88    133.00 o
 -12  27  15        0.40       -6.19     89.93 o
  -9  27  15        1.16      -20.89     86.49 o
  -6  27  15      183.27      327.06    128.99 o
  -3  27  15      863.33      909.56    182.49 o
   0  27  15       56.31      -36.69     87.65 o
 -26  28  15       77.13      116.23    147.63 o
 -23  28  15      136.70       74.66    148.04 o
 -20  28  15     1217.99     1173.73    280.48 o
 -17  28  15      314.01      309.95    154.89 o
 -14  28  15      187.34      190.71    125.34 o
 -11  28  15     1160.55     1269.27    202.46 o
  -8  28  15       54.54       16.01     88.72 o
  -5  28  15      352.84      224.49    122.56 o
  -2  28  15        5.19       40.85    101.95 o
 -25  29  15      452.80      208.84    160.63 o
 -22  29  15       75.57      -12.92    126.28 o
 -19  29  15      174.93      153.39    133.65 o
 -16  29  15       41.32        7.39    113.97 o
 -13  29  15     1070.07     1543.70    225.39 o
 -10  29  15     1392.00     1210.88    206.26 o
  -7  29  15      736.13      679.61    166.00 o
  -4  29  15       11.86        6.40     96.96 o
 -24  30  15      438.18      516.51    215.36 o
 -21  30  15       85.72       44.61    134.26 o
 -18  30  15       40.47       37.31    124.12 o
 -15  30  15      380.09      286.86    160.50 o
 -12  30  15     4789.08     5291.07    440.08 o
  -9  30  15     1986.15     2556.69    275.61 o
  -6  30  15      247.96      146.57    110.62 o
 -20  31  15       86.93      128.29    139.77 o
 -17  31  15      159.67      158.78    131.21 o
 -14  31  15     2313.72     2272.22    322.65 o
 -11  31  15     2454.06     2653.75    282.21 o
  -1   1  16    18667.62    19809.66    511.13 o
  -3   2  16       93.53      137.17     95.34 o
   0   2  16     4570.46     5621.00    289.81 o
  -5   3  16     2012.27     1500.50    166.90 o
  -2   3  16       15.00       90.64     87.63 o
   1   3  16      807.28      294.38     96.68 o
  -7   4  16      948.73      789.13    132.95 o
  -4   4  16       56.64      173.91     86.64 o
  -1   4  16      979.02     1597.19    187.56 o
   2   4  16     2782.64     2036.12    190.09 o
  -9   5  16      431.63      453.43    122.24 o
  -6   5  16      201.47      190.10     88.64 o
  -3   5  16     1782.14     2907.05    215.43 o
   0   5  16     1396.91     2406.22    202.29 o
   3   5  16      824.93      315.19    106.82 o
 -11   6  16      256.18      259.46    107.85 o
  -8   6  16      223.18      122.80     94.37 o
  -5   6  16     4818.61     4606.88    258.24 o
  -2   6  16    11453.02    11858.98    368.05 o
   1   6  16        6.21       11.65     77.78 o
   4   6  16      294.17      201.89     99.93 o
 -13   7  16     4286.39     2875.14    248.28 o
 -10   7  16      636.50      796.62    149.84 o
  -7   7  16       54.11       95.48     78.10 o
  -4   7  16    18072.27    19361.41    612.24 o
  -1   7  16    12470.70    12693.51    383.23 o
   2   7  16      609.12      482.28    127.86 o
   5   7  16     2230.72     2140.02    223.36 o
 -15   8  16     2817.26     2791.35    247.50 o
 -12   8  16       17.01      -16.05     79.81 o
  -9   8  16      583.21      403.61    120.23 o
  -6   8  16     1829.09     2270.37    199.95 o
  -3   8  16    36673.34    35992.13    694.44 o
   0   8  16      517.77      564.16    133.91 o
   3   8  16      262.15      262.97    108.53 o
   6   8  16     7892.55     5997.90    317.26 o
 -17   9  16     2750.76     2452.30    238.62 o
 -14   9  16     2487.82     2132.55    226.23 o
 -11   9  16      875.10     1002.66    164.92 o
  -8   9  16      563.40       99.44     84.61 o
  -5   9  16    21087.76    22561.59    512.57 o
  -2   9  16    17963.47    19883.97    501.67 o
   1   9  16      869.93      540.36    131.67 o
   4   9  16     7308.09     6787.31    346.18 o
   7   9  16     1762.59     1451.07    197.51 o
 -19  10  16    21708.43    22668.42   1188.53 o
 -16  10  16      433.16      373.58    121.93 o
 -13  10  16     2552.19     3354.59    264.30 o
 -10  10  16     5443.03     4847.61    300.75 o
  -7  10  16      504.75      331.13    104.53 o
  -4  10  16    38148.53    42928.44    850.02 o
  -1  10  16     6279.96     6725.14    294.99 o
   2  10  16      729.28      471.46    127.63 o
   5  10  16     1339.80     1094.46    175.57 o
   8  10  16     2641.73     2595.93    279.90 o
 -21  11  16    15859.88    16928.05    912.34 o
 -18  11  16    19564.85    20301.80    758.97 o
 -15  11  16     1397.52     1274.89    186.34 o
 -12  11  16     3134.63     4088.46    301.47 o
  -9  11  16      475.92      422.83    128.89 o
  -6  11  16     9251.82     9764.24    348.10 o
  -3  11  16    22514.75    22542.05    776.43 o
   0  11  16     2287.41     2607.07    238.85 o
   3  11  16      153.55      214.90    105.98 o
   6  11  16      490.69      660.71    156.94 o
   9  11  16     9875.44    10223.44    734.10 o
 -23  12  16      917.41      476.55    156.84 o
 -20  12  16    17263.21    18734.04    807.79 o
 -17  12  16     2269.62     2479.01    246.74 o
 -14  12  16     3480.32     2681.80    248.30 o
 -11  12  16        8.19       54.65     92.20 o
  -8  12  16    14905.81    13978.21    416.30 o
  -5  12  16    10421.71     9610.42    347.60 o
  -2  12  16    12301.26    12900.81    402.90 o
   1  12  16     2002.26     1789.65    212.16 o
   4  12  16     3988.54     3724.71    311.73 o
   7  12  16     3157.34     2585.24    277.69 o
  10  12  16     3837.24     4927.03    580.79 o
 -25  13  16       35.43      -12.55     99.05 o
 -22  13  16     9115.63     8092.86    469.24 o
 -19  13  16    11072.54    11744.42    664.73 o
 -16  13  16      604.26      549.56    138.58 o
 -13  13  16       79.15      222.93    110.91 o
 -10  13  16     5538.22     6379.17    322.26 o
  -7  13  16     9961.18    10579.03    367.15 o
  -4  13  16     2165.40     2246.41    210.18 o
  -1  13  16     5715.56     5699.04    345.82 o
   2  13  16     8358.06     8535.60    409.32 o
   5  13  16     2116.42     2012.59    249.68 o
   8  13  16     1725.89     1371.98    217.90 o
  11  13  16        0.58       11.40     98.03 o
 -27  14  16       35.60       72.86    121.03 o
 -24  14  16     2036.72     2016.34    258.09 o
 -21  14  16     7660.02     8146.70    423.43 o
 -18  14  16      945.70      697.47    154.20 o
 -15  14  16      115.32      191.08    109.24 o
 -12  14  16    13386.38    14023.84    516.80 o
  -9  14  16     5388.29     5173.84    347.11 o
  -6  14  16      425.00      733.46    138.79 o
  -3  14  16      299.71      147.09     96.88 o
   0  14  16     2575.20     2743.38    279.29 o
   3  14  16     4040.23     4513.32    338.38 o
   6  14  16       37.30       71.77    104.83 o
   9  14  16      854.21      377.70    143.87 o
  12  14  16      378.57      416.84    147.45 o
 -29  15  16      373.48      393.03    171.95 o
 -26  15  16     1304.78     1681.56    275.82 o
 -23  15  16     3004.26     3485.71    325.24 o
 -20  15  16     2807.03     2667.65    261.42 o
 -17  15  16        5.48      -22.48     79.32 o
 -14  15  16     6311.82     5792.43    339.34 o
 -11  15  16     5766.75     5511.36    327.12 o
  -8  15  16     2713.30     2703.39    226.44 o
  -5  15  16     1341.85     1105.14    173.24 o
  -2  15  16     1577.89     1746.42    206.84 o
   1  15  16     4616.92     4615.25    310.91 o
   4  15  16      188.06      206.51    118.14 o
   7  15  16      741.40      500.83    153.20 o
  10  15  16      462.42      717.38    201.90 o
  13  15  16      315.35      500.83    180.13 o
 -28  16  16     1897.72     1559.29    273.67 o
 -25  16  16      802.88      861.12    210.16 o
 -22  16  16     1308.16     1765.01    282.59 o
 -19  16  16      498.60      531.01    142.79 o
 -16  16  16      436.91      759.67    155.21 o
 -13  16  16    13407.38    12300.26    446.73 o
 -10  16  16     1480.60     2154.69    231.30 o
  -7  16  16       22.84      -38.08     76.91 o
  -4  16  16      500.44      432.78    137.28 o
  -1  16  16     1451.58     1313.90    212.86 o
   2  16  16     1237.10      963.79    187.98 o
   5  16  16        4.09      109.95    116.20 o
   8  16  16     3183.31     3241.63    314.93 o
  11  16  16       28.07       64.15    109.61 o
  14  16  16       31.24      137.10    138.62 o
 -30  17  16     2819.37     2667.93    402.80 o
 -27  17  16     2856.46     2719.69    331.20 o
 -24  17  16       42.10      -44.88     90.42 o
 -21  17  16      169.76      219.87    111.91 o
 -18  17  16     2502.45     3101.89    275.43 o
 -15  17  16     4308.41     4103.86    301.80 o
 -12  17  16      642.36     1042.10    188.80 o
  -9  17  16        6.97       54.50     89.08 o
  -6  17  16      848.64     1196.06    183.43 o
  -3  17  16       44.49       -1.15     75.10 o
   0  17  16      278.39      282.39    113.15 o
   3  17  16      794.85      691.48    166.05 o
   6  17  16      509.34      554.57    159.43 o
   9  17  16     1238.51     1856.70    260.15 o
  12  17  16     1144.20     1185.44    246.83 o
 -29  18  16     1580.43     1093.13    237.41 o
 -26  18  16       17.63       -1.19    102.32 o
 -23  18  16      478.36      290.90    136.94 o
 -20  18  16       98.28      -12.22     88.84 o
 -17  18  16        2.43       57.19     93.29 o
 -14  18  16     4867.27     4802.32    350.96 o
 -11  18  16       66.58       14.89     91.33 o
  -8  18  16     3533.03     3186.77    269.39 o
  -5  18  16      166.35      300.50    116.07 o
  -2  18  16        7.96      145.87    100.81 o
   1  18  16     1927.45     2162.16    235.87 o
   4  18  16      157.45      285.61    130.42 o
   7  18  16      941.76      996.15    200.67 o
  10  18  16      158.13      123.68    121.41 o
 -28  19  16      425.45      503.57    173.37 o
 -25  19  16      237.15      344.54    158.50 o
 -22  19  16     1905.17     2505.77    268.23 o
 -19  19  16     1653.25     1862.15    227.10 o
 -16  19  16     1524.92     1300.25    198.72 o
 -13  19  16       76.24      108.91    117.70 o
 -10  19  16      220.37      189.15    103.73 o
  -7  19  16     1561.21     1195.07    185.75 o
  -4  19  16      429.65      378.07    122.01 o
  -1  19  16      608.88      421.87    131.67 o
   2  19  16      785.81      895.20    193.43 o
   5  19  16       12.29        1.20    100.45 o
   8  19  16        3.28       48.44    111.79 o
  11  19  16      795.32      659.09    203.41 o
 -30  20  16     1258.41      953.35    224.12 o
 -27  20  16      551.51      264.66    147.56 o
 -24  20  16      273.69      190.05    137.21 o
 -21  20  16      671.58      666.68    158.29 o
 -18  20  16      235.32      418.45    142.73 o
 -15  20  16        1.76       31.75    105.04 o
 -12  20  16     1170.61      960.61    192.51 o
  -9  20  16     1128.45     1008.91    177.10 o
  -6  20  16      143.95       57.54     92.67 o
  -3  20  16      267.77      153.09    105.35 o
   0  20  16       25.32      149.33    103.07 o
   3  20  16      532.26      347.04    142.90 o
   6  20  16        1.35      -64.32     91.30 o
   9  20  16      862.58     1476.41    243.29 o
 -29  21  16      394.04      336.43    168.98 o
 -26  21  16      551.41      635.72    201.04 o
 -23  21  16     1200.76     1438.81    236.99 o
 -20  21  16      100.56       23.70    101.00 o
 -17  21  16        5.10       -2.87    105.50 o
 -14  21  16      199.03      239.57    132.64 o
 -11  21  16     1232.09     1090.30    183.21 o
  -8  21  16       14.03      101.78     97.97 o
  -5  21  16     1579.90     1535.18    207.68 o
  -2  21  16      362.19      542.00    145.39 o
   1  21  16     1719.81     2078.25    243.08 o
   4  21  16       38.82      214.84    127.12 o
   7  21  16      695.30      758.94    188.74 o
 -28  22  16     2727.42     2702.47    346.23 o
 -25  22  16      270.28      329.19    158.46 o
 -22  22  16       94.67       41.62    116.17 o
 -19  22  16      106.67      224.24    135.80 o
 -16  22  16      200.56      254.85    147.14 o
 -13  22  16     2265.95     2190.61    267.62 o
 -10  22  16      575.87      593.84    150.14 o
  -7  22  16      625.08      549.29    210.29 o
  -4  22  16        6.73       18.93     86.20 o
  -1  22  16     4713.57     5222.04    347.95 o
   2  22  16     1005.36     1291.42    226.75 o
   5  22  16      537.52      551.78    167.21 o
 -27  23  16      813.90      713.22    206.47 o
 -24  23  16      259.54      442.35    179.54 o
 -21  23  16      168.85       15.70    133.96 o
 -18  23  16     1329.42     1444.65    257.60 o
 -15  23  16      836.74      308.69    153.72 o
 -12  23  16      816.41      717.17    178.95 o
  -9  23  16      419.45      367.28    128.92 o
  -6  23  16     1873.04     1967.54    237.31 o
  -3  23  16     5058.91     4912.54    340.55 o
   0  23  16     6660.74     8068.81    451.02 o
   3  23  16       29.49      155.11    126.86 o
   6  23  16      892.09      888.16    199.56 o
 -26  24  16       52.99      -67.87    115.29 o
 -23  24  16      133.27       74.25    149.01 o
 -20  24  16     1051.88     1387.62    308.54 o
 -17  24  16     7632.96     7939.28    493.59 o
 -14  24  16       78.76        9.02     98.71 o
 -11  24  16     1380.20     1127.18    187.17 o
  -8  24  16     1579.74     1375.16    209.91 o
  -5  24  16      126.63      130.51     99.40 o
  -2  24  16    11031.07    12237.29    635.64 o
   1  24  16      481.39      445.62    150.88 o
   4  24  16      124.96      124.43    130.27 o
 -28  25  16      587.92      734.82    296.04 o
 -25  25  16      313.67      318.76    162.59 o
 -22  25  16       98.98      129.53    148.59 o
 -19  25  16     6826.65     6698.04    628.40 o
 -16  25  16     8985.87    11398.52    660.08 o
 -13  25  16      291.27      382.91    145.46 o
 -10  25  16      751.43      938.23    181.26 o
  -7  25  16      522.90      481.71    143.76 o
  -4  25  16     4061.08     4366.44    331.92 o
  -1  25  16     5440.85     5512.93    406.60 o
   2  25  16       23.82       -5.19    102.45 o
 -27  26  16      350.54      238.88    178.34 o
 -24  26  16      551.41      386.45    195.43 o
 -21  26  16     1515.03     1633.14    338.05 o
 -18  26  16    12913.20    12957.09    816.96 o
 -15  26  16     1640.10     1510.63    267.57 o
 -12  26  16      215.07      224.98    125.62 o
  -9  26  16       90.55       59.13     98.00 o
  -6  26  16      673.91      598.04    154.43 o
  -3  26  16     6758.15     7551.82    519.25 o
   0  26  16      104.51       30.30     99.57 o
 -26  27  16      358.36      235.91    180.39 o
 -23  27  16       11.48      -28.10    127.41 o
 -20  27  16     6658.41     6954.84    673.30 o
 -17  27  16     6875.81     6453.46    542.21 o
 -14  27  16      156.89       70.07    112.62 o
 -11  27  16       51.84       59.73     97.46 o
  -8  27  16       34.53      -21.96     89.92 o
  -5  27  16     3071.34     3157.14    299.45 o
  -2  27  16     1151.49     1197.09    203.47 o
 -25  28  16        0.62       41.05    158.51 o
 -22  28  16      857.73      703.95    240.61 o
 -19  28  16     4634.15     4336.35    478.37 o
 -16  28  16      253.27        0.28    108.63 o
 -13  28  16        2.84      -15.55     99.43 o
 -10  28  16      303.33      256.90    124.59 o
  -7  28  16     1712.71     1760.62    234.64 o
  -4  28  16     1119.03     1199.55    206.31 o
 -21  29  16     1560.58     1716.66    334.07 o
 -18  29  16      625.47      531.61    211.58 o
 -15  29  16        2.24      -92.36    100.40 o
 -12  29  16     1301.80     1697.00    239.83 o
  -9  29  16     1103.84     1427.79    220.14 o
  -6  29  16     1030.08      969.64    191.80 o
 -20  30  16      845.00      983.10    260.74 o
 -17  30  16       11.26       52.15    122.66 o
 -14  30  16      512.06      373.11    168.39 o
 -11  30  16     1570.84     2004.34    255.70 o
   0   1  17      883.49      594.74    134.95 o
  -2   2  17     1173.49     1775.93    201.66 o
   1   2  17     1597.82     2437.17    227.98 o
  -4   3  17     2815.44     3093.63    265.22 o
  -1   3  17     1838.07     2050.15    214.48 o
   2   3  17     3661.52     3977.10    390.01 o
  -6   4  17      640.95      780.51    135.12 o
  -3   4  17     1041.60     1625.70    196.84 o
   0   4  17     1650.12     2187.18    217.85 o
   3   4  17       31.89      -17.08     77.87 o
  -8   5  17     2306.76     1803.39    206.41 o
  -5   5  17       81.40      -65.08     68.06 o
  -2   5  17       52.00      222.26    105.93 o
   1   5  17       19.52      -23.22     81.14 o
   4   5  17     3447.99     3389.94    261.78 o
 -10   6  17     7190.64     7439.16    474.91 o
  -7   6  17     1681.20     1771.36    206.37 o
  -4   6  17     2490.50     1837.49    209.40 o
  -1   6  17     1475.87      842.82    154.93 o
   2   6  17      321.53       71.54     88.00 o
   5   6  17     1427.42     1648.98    203.09 o
 -12   7  17     2030.70     1925.91    217.58 o
  -9   7  17     3187.83     2653.26    243.06 o
  -6   7  17      642.26      720.09    131.67 o
  -3   7  17    11169.83    12487.27    508.56 o
   0   7  17     2486.88     2217.53    223.95 o
   3   7  17      477.84      520.38    131.93 o
   6   7  17        0.34       52.14     89.96 o
 -14   8  17        1.19      -34.89     80.98 o
 -11   8  17     3143.35     2581.53    240.92 o
  -8   8  17     2718.41     2901.88    247.60 o
  -5   8  17     8033.12     7490.75    312.27 o
  -2   8  17    10351.42     9971.08    427.29 o
   1   8  17     1667.01     1201.57    178.06 o
   4   8  17      554.33      635.74    143.47 o
   7   8  17      385.89      545.86    139.46 o
 -16   9  17        4.10      -38.24     82.00 o
 -13   9  17      307.28       39.64     86.10 o
 -10   9  17      795.74     1075.85    175.80 o
  -7   9  17      445.93      190.61     96.28 o
  -4   9  17    28282.29    26578.92    618.15 o
  -1   9  17     5381.88     5464.03    312.88 o
   2   9  17       20.46      120.49     92.74 o
   5   9  17      280.30      170.23    105.36 o
   8   9  17      313.25      231.12    122.68 o
 -18  10  17    10793.80    10968.26    550.69 o
 -15  10  17      140.84       72.13     94.40 o
 -12  10  17        2.03       37.74     84.73 o
  -9  10  17     1466.35     1991.39    217.16 o
  -6  10  17     9830.36    11381.05    442.75 o
  -3  10  17    14477.41    14602.38    515.72 o
   0  10  17     2890.65     2491.23    239.00 o
   3  10  17      147.14      266.93    108.83 o
   6  10  17     1057.44      936.40    185.40 o
   9  10  17     8365.32     8209.30    423.18 o
 -20  11  17    14324.27    13956.77    836.51 o
 -17  11  17     4014.86     4566.38    371.25 o
 -14  11  17      507.00      367.62    122.37 o
 -11  11  17        7.17      -43.60     74.90 o
  -8  11  17        6.21       10.17     88.28 o
  -5  11  17    11419.34    10131.28    564.10 o
  -2  11  17     5366.79     5192.44    315.75 o
   1  11  17       21.07      -61.64     76.28 o
   4  11  17      163.16      246.26    120.13 o
   7  11  17      316.97       98.53    106.06 o
  10  11  17     4939.56     4529.42    353.76 o
 -22  12  17     4369.51     4174.99    347.07 o
 -19  12  17    12887.90    12225.55    508.77 o
 -16  12  17      116.36       34.77     91.76 o
 -13  12  17      147.95       56.50     90.23 o
 -10  12  17      125.01       59.62     92.29 o
  -7  12  17    11239.48    10942.24    546.74 o
  -4  12  17     4595.42     4395.89    274.30 o
  -1  12  17      556.72      488.40    129.01 o
   2  12  17     2052.22     1858.99    240.04 o
   5  12  17        2.73       10.10     93.35 o
   8  12  17     1915.84     2015.31    257.95 o
  11  12  17      246.50      173.94    120.38 o
 -24  13  17      257.83      328.87    134.23 o
 -21  13  17    10081.09    10833.45    485.76 o
 -18  13  17     2277.99     1661.91    217.72 o
 -15  13  17      523.97      590.95    144.71 o
 -12  13  17      919.64      707.64    166.85 o
  -9  13  17      724.98      418.53    141.93 o
  -6  13  17     5946.68     5881.09    328.08 o
  -3  13  17        7.67       43.27     80.99 o
   0  13  17       85.21       92.46    101.59 o
   3  13  17     1248.01     1502.86    226.39 o
   6  13  17       14.02      -28.06     93.15 o
   9  13  17      959.99      942.66    192.64 o
  12  13  17      473.37      477.80    150.04 o
 -26  14  17       15.67       72.72    109.97 o
 -23  14  17     2630.53     3117.02    315.71 o
 -20  14  17     6829.38     7334.26    421.38 o
 -17  14  17      424.19      510.54    137.68 o
 -14  14  17      308.47      137.48    100.77 o
 -11  14  17     1146.06     1217.88    181.97 o
  -8  14  17     3105.86     3445.84    276.74 o
  -5  14  17       71.18       45.65     80.52 o
  -2  14  17      529.62      479.28    140.60 o
   1  14  17      812.21      742.31    167.82 o
   4  14  17      276.26      297.83    131.66 o
   7  14  17        6.33       14.93     95.58 o
  10  14  17      361.15      309.12    138.82 o
  13  14  17       75.38      123.64    125.99 o
 -28  15  17        0.83       -9.57    111.12 o
 -25  15  17      767.65      764.13    197.65 o
 -22  15  17     2477.68     2387.09    278.98 o
 -19  15  17      184.51      285.99    122.73 o
 -16  15  17      360.79      425.52    133.57 o
 -13  15  17     1917.48     2089.69    231.61 o
 -10  15  17       57.50       26.23     97.44 o
  -7  15  17       65.46      -25.58     86.35 o
  -4  15  17     1347.69     1380.91    193.81 o
  -1  15  17      166.28      144.20    111.99 o
   2  15  17      206.93      339.42    134.74 o
   5  15  17     1673.92     1526.35    232.22 o
   8  15  17     1210.64     1880.11    253.03 o
  11  15  17       37.56      -66.48    110.85 o
  14  15  17       44.98      -29.79    110.84 o
 -27  16  17      760.94      401.92    170.56 o
 -24  16  17      142.71       60.28    107.02 o
 -21  16  17      309.53      279.82    131.29 o
 -18  16  17     3060.80     2849.68    264.95 o
 -15  16  17       44.03       54.33     92.26 o
 -12  16  17      307.68      568.31    152.96 o
  -9  16  17       44.57      109.43     97.18 o
  -6  16  17     1329.02     1358.18    196.59 o
  -3  16  17     2518.21     1956.51    247.28 o
   0  16  17      184.22      230.05    119.08 o
   3  16  17     2547.61     3051.21    302.50 o
   6  16  17       28.90      214.93    135.93 o
   9  16  17     2658.60     2723.58    301.55 o
  12  16  17      298.71      462.71    185.64 o
 -29  17  17      636.24      690.75    194.79 o
 -26  17  17      622.49      522.49    178.10 o
 -23  17  17       88.67        7.85     97.34 o
 -20  17  17      181.36      122.35    108.52 o
 -17  17  17     4875.48     4906.30    333.17 o
 -14  17  17       21.16      -13.41     84.25 o
 -11  17  17       63.96      143.43    118.98 o
  -8  17  17     2759.72     2995.49    294.01 o
  -5  17  17       36.45       -3.88     84.46 o
  -2  17  17      649.05      781.93    161.04 o
   1  17  17     3282.10     2586.76    285.07 o
   4  17  17     1067.20     1039.16    200.17 o
   7  17  17     1660.71     1894.90    260.77 o
  10  17  17     2368.11     2314.20    292.51 o
 -28  18  17      276.16      355.36    157.76 o
 -25  18  17        2.93       -2.65    103.30 o
 -22  18  17        9.24      -18.48     94.90 o
 -19  18  17     2687.71     3016.55    279.94 o
 -16  18  17     1104.64     1493.96    208.43 o
 -13  18  17      735.50      549.04    171.66 o
 -10  18  17       16.80      -37.39    103.74 o
  -7  18  17     8422.00     8730.66    415.37 o
  -4  18  17      176.94      233.47    113.18 o
  -1  18  17     3216.28     3598.68    323.81 o
   2  18  17     4937.03     4966.83    374.23 o
   5  18  17       32.62      -87.46     87.46 o
   8  18  17     2113.16     2587.61    298.82 o
  11  18  17      339.55      285.07    162.50 o
 -27  19  17       17.30       52.24    123.67 o
 -24  19  17       83.67       40.24    120.06 o
 -21  19  17      379.22      398.42    136.74 o
 -18  19  17     2883.89     3389.18    295.27 o
 -15  19  17     1854.17     2182.54    304.65 o
 -12  19  17      377.43      622.31    180.70 o
  -9  19  17     8760.57     9457.13    410.74 o
  -6  19  17     2350.19     2011.94    234.12 o
  -3  19  17      758.11      594.16    147.15 o
   0  19  17     2426.55     2583.19    288.61 o
   3  19  17      334.08      253.24    132.83 o
   6  19  17      115.86      -23.55     93.81 o
   9  19  17     1473.60     1508.27    246.53 o
 -26  20  17        9.04        6.37    114.66 o
 -23  20  17      744.29      610.24    185.50 o
 -20  20  17        4.21      -35.19     92.82 o
 -17  20  17     1151.45     1164.53    237.77 o
 -14  20  17      751.54     1073.45    226.59 o
 -11  20  17       45.55       -0.13    108.98 o
  -8  20  17     7193.63     7440.65    380.54 o
  -5  20  17       45.45      -14.85     88.12 o
  -2  20  17      345.03      312.13    124.13 o
   1  20  17       12.74       28.60     99.55 o
   4  20  17      105.42      -23.88    102.23 o
   7  20  17      567.16      396.68    156.24 o
 -28  21  17      296.10      248.05    148.82 o
 -25  21  17     1159.14     1512.10    273.03 o
 -22  21  17      111.53      103.93    124.39 o
 -19  21  17       46.82      -43.57    105.54 o
 -16  21  17     1603.23     1741.55    273.04 o
 -13  21  17      605.70      400.01    158.33 o
 -10  21  17     1499.90     1676.18    221.50 o
  -7  21  17     2667.35     2522.95    257.15 o
  -4  21  17      446.98      545.43    144.87 o
  -1  21  17     2361.58     2753.02    299.55 o
   2  21  17     1259.27     1243.11    221.43 o
   5  21  17       62.65      -63.02     95.96 o
 -27  22  17       40.10      -20.42    121.41 o
 -24  22  17     1951.38     1992.36    348.63 o
 -21  22  17       90.35      -41.42    107.61 o
 -18  22  17        5.65       37.67    110.04 o
 -15  22  17        3.66        1.78    101.24 o
 -12  22  17       10.55        7.63    108.76 o
  -9  22  17     1260.63     1828.39    228.80 o
  -6  22  17      201.40      263.61    121.53 o
  -3  22  17     2508.64     2218.38    254.36 o
   0  22  17     5114.23     5905.62    407.17 o
   3  22  17      137.48       90.35    115.37 o
 -26  23  17      651.57      621.93    222.97 o
 -23  23  17      366.58      391.49    195.79 o
 -20  23  17      813.36      794.23    248.97 o
 -17  23  17     1504.86     1675.42    275.20 o
 -14  23  17      250.75      368.01    164.39 o
 -11  23  17        6.58       78.04    108.12 o
  -8  23  17      108.03       56.96     95.49 o
  -5  23  17        0.48       21.80     94.98 o
  -2  23  17     8288.78     8336.61    458.39 o
   1  23  17     1187.84     1104.16    220.15 o
   4  23  17       43.88       40.08    107.60 o
 -25  24  17      751.11      818.77    247.50 o
 -22  24  17       26.21     -109.09    109.09 o
 -19  24  17     3324.22     3009.25    405.92 o
 -16  24  17     6110.98     6885.45    476.97 o
 -13  24  17       95.52       -8.02    113.20 o
 -10  24  17        1.01       13.19     94.71 o
  -7  24  17      484.44      555.30    147.46 o
  -4  24  17     2843.19     3204.73    295.62 o
  -1  24  17     7979.01     8300.85    511.67 o
   2  24  17        5.05      -47.99    103.16 o
 -24  25  17        2.13       14.25    132.44 o
 -21  25  17      289.16      135.55    155.51 o
 -18  25  17     9003.83    10008.06   1247.16 o
 -15  25  17     3424.68     3504.54    377.95 o
 -12  25  17       22.25      -22.98     95.22 o
  -9  25  17      135.77      113.47    103.15 o
  -6  25  17       42.27      -13.95     91.10 o
  -3  25  17     7305.70     8749.08    520.52 o
   0  25  17      338.86      285.67    147.16 o
 -23  26  17      168.55      153.19    172.40 o
 -20  26  17     4090.38     3506.43    441.28 o
 -17  26  17     6150.30     6821.88    496.02 o
 -14  26  17       11.13      -27.96    104.00 o
 -11  26  17        0.70      -41.12     95.63 o
  -8  26  17      284.70      217.85    120.68 o
  -5  26  17     1947.38     2553.75    279.72 o
  -2  26  17     2347.30     2474.73    306.11 o
 -22  27  17      110.81      150.41    147.75 o
 -19  27  17     7270.28     6844.77    570.19 o
 -16  27  17      415.16      427.66    175.29 o
 -13  27  17       70.71      -12.83     90.39 o
 -10  27  17       38.21      185.17    118.90 o
  -7  27  17      469.74      800.44    172.85 o
  -4  27  17     2157.07     2600.78    281.18 o
 -21  28  17     1594.98     1901.59    350.30 o
 -18  28  17     2036.46     1513.25    308.30 o
 -15  28  17       63.32      -74.32    106.20 o
 -12  28  17      269.66      317.43    147.07 o
  -9  28  17      285.36      399.64    139.68 o
 -17  29  17        0.29       55.89    147.09 o
 -14  29  17       64.05       47.93    109.24 o
 -11  29  17      684.70      909.97    230.79 o
   0   0  18     1534.74     2031.52    381.46 o
   1   1  18       15.11       94.71     94.99 o
  -1   2  18      257.09      134.68     96.61 o
   2   2  18     1519.99     1449.59    194.24 o
  -3   3  18     1511.46     1006.37    170.60 o
   0   3  18     3366.13     3419.98    268.57 o
   3   3  18      388.40      359.10    130.19 o
  -5   4  18       36.39      -14.95     84.41 o
  -2   4  18     4421.37     5187.54    309.05 o
   1   4  18     1291.85      874.30    159.54 o
   4   4  18     9912.31    10097.48    441.17 o
  -7   5  18     8379.33     9829.58    433.41 o
  -4   5  18      339.25      301.82    115.90 o
  -1   5  18     5618.25     6357.71    333.85 o
   2   5  18      112.85      103.74    106.66 o
   5   5  18    18873.66    19227.36    600.11 o
  -9   6  18    21068.84    23087.93    594.97 o
  -6   6  18       36.55      162.51    101.36 o
  -3   6  18       24.31      210.43    106.85 o
   0   6  18      653.67      531.40    148.55 o
   3   6  18     2110.33     1953.26    221.33 o
   6   6  18     8828.45     7412.29    372.72 o
 -11   7  18    25277.85    25288.49    763.26 o
  -8   7  18     4899.52     4747.41    306.81 o
  -5   7  18      142.86      191.50    106.00 o
  -2   7  18      282.86      632.30    156.15 o
   1   7  18      196.04      103.19    111.08 o
   4   7  18     5702.27     5990.46    332.98 o
   7   7  18      463.00      227.27    113.45 o
 -13   8  18     6578.53     8061.11    371.45 o
 -10   8  18    13002.95    13278.40    461.69 o
  -7   8  18      123.55      177.53    105.02 o
  -4   8  18     4186.98     3402.19    271.08 o
  -1   8  18       18.78       51.75     98.84 o
   2   8  18      492.36      445.57    130.07 o
   5   8  18     3268.61     3379.02    277.24 o
   8   8  18       39.59       20.57     92.28 o
 -15   9  18       64.98       40.09     91.70 o
 -12   9  18    11524.20    13474.92    579.16 o
  -9   9  18      144.03      218.06    113.03 o
  -6   9  18     1789.86     1591.28    204.72 o
  -3   9  18     6670.79     6864.03    379.36 o
   0   9  18        3.93       26.75     91.25 o
   3   9  18     1827.20     2254.38    238.71 o
   6   9  18       86.36       92.87     98.88 o
   9   9  18      633.08      695.17    175.72 o
 -17  10  18      842.37      638.38    150.99 o
 -14  10  18      689.69      727.85    156.10 o
 -11  10  18     1853.44     2194.18    231.60 o
  -8  10  18     1669.04     1487.30    199.61 o
  -5  10  18     5461.96     5656.20    359.24 o
  -2  10  18     1732.20     1881.03    242.88 o
   1  10  18      290.75      268.73    117.92 o
   4  10  18      868.53      838.87    162.08 o
   7  10  18       75.78      -70.68     79.08 o
  10  10  18     1163.22      891.93    189.77 o
 -19  11  18     3488.68     3519.09    324.27 o
 -16  11  18       77.14        7.97     88.14 o
 -13  11  18     1751.44     1781.46    219.15 o
 -10  11  18     3402.56     3233.20    273.30 o
  -7  11  18     1017.82     1674.13    209.45 o
  -4  11  18     4504.99     4354.64    333.22 o
  -1  11  18      448.55      426.48    128.50 o
   2  11  18      109.49       51.00     96.63 o
   5  11  18      339.12      356.78    136.50 o
   8  11  18        3.77       78.24    100.15 o
  11  11  18      418.09      408.13    147.50 o
 -21  12  18     2032.77     2239.60    275.98 o
 -18  12  18     1748.45     1567.74    214.56 o
 -15  12  18       17.28      -23.20     84.86 o
 -12  12  18        4.41       84.01     94.24 o
  -9  12  18     1279.89     1283.33    211.41 o
  -6  12  18     2209.48     2105.59    230.10 o
  -3  12  18      210.18      353.67    133.98 o
   0  12  18     2266.43     2350.85    267.03 o
   3  12  18      525.98      459.04    150.33 o
   6  12  18      440.07      331.40    138.65 o
   9  12  18       49.89      115.32    113.42 o
  12  12  18      586.83      511.06    150.88 o
 -23  13  18      150.68      132.39    119.06 o
 -20  13  18     1972.03     1770.47    252.33 o
 -17  13  18       44.63      -21.49     84.54 o
 -14  13  18      265.96      233.66    114.39 o
 -11  13  18      689.43      791.14    161.04 o
  -8  13  18      794.85      516.79    147.59 o
  -5  13  18      308.35      390.56    139.57 o
  -2  13  18     2212.45     2475.76    269.06 o
   1  13  18       37.52       35.06     97.89 o
   4  13  18      157.99       65.42    103.72 o
   7  13  18      121.96      110.64    108.86 o
  10  13  18       27.03       52.68    101.54 o
  13  13  18      123.29      131.74    118.49 o
 -25  14  18       22.51       42.67    102.43 o
 -22  14  18      401.95      239.70    130.55 o
 -19  14  18       37.58      164.94    110.52 o
 -16  14  18      325.70      306.49    112.80 o
 -13  14  18       64.52      166.28    105.12 o
 -10  14  18      104.93      223.37    123.56 o
  -7  14  18        1.47       46.68     85.57 o
  -4  14  18      535.81      226.67    131.02 o
  -1  14  18     3248.50     2752.49    282.80 o
   2  14  18      178.52      154.33    117.97 o
   5  14  18     1097.59     1236.46    209.61 o
   8  14  18        2.88      -62.72     85.93 o
  11  14  18       22.27       -2.42     96.62 o
 -27  15  18        2.88      -58.66    103.19 o
 -24  15  18       30.67       89.49    105.98 o
 -21  15  18       39.73      -31.27     92.13 o
 -18  15  18      573.24      538.33    144.49 o
 -15  15  18       16.11       18.74     92.03 o
 -12  15  18       38.04       37.32     99.62 o
  -9  15  18      275.91      177.21    111.62 o
  -6  15  18       70.79       68.71     97.49 o
  -3  15  18     4650.28     4233.15    336.46 o
   0  15  18      140.65      -39.83     85.00 o
   3  15  18      731.61      745.20    176.84 o
   6  15  18      192.07       76.20    109.58 o
   9  15  18      301.94      129.21    120.42 o
  12  15  18      566.23     1217.02    247.37 o
 -26  16  18      361.82      224.42    145.50 o
 -23  16  18        1.56       66.56    107.24 o
 -20  16  18      782.23     1115.75    192.92 o
 -17  16  18     1336.48     1687.70    222.77 o
 -14  16  18       58.89       23.86     96.10 o
 -11  16  18      582.58      842.08    180.23 o
  -8  16  18       33.09      113.73    108.95 o
  -5  16  18       89.38      154.98    121.16 o
  -2  16  18     2805.22     3342.61    310.79 o
   1  16  18      405.02      324.06    135.85 o
   4  16  18     1881.18     1800.89    252.57 o
   7  16  18      193.25      259.97    147.81 o
  10  16  18     4421.02     4797.70    386.50 o
 -25  17  18        0.48       40.71    112.15 o
 -22  17  18      397.27      362.47    147.84 o
 -19  17  18      985.27     1158.54    188.47 o
 -16  17  18      998.73     1187.72    194.81 o
 -13  17  18     1213.20     1158.66    207.39 o
 -10  17  18      786.54      693.22    190.96 o
  -7  17  18     3432.67     4186.66    338.49 o
  -4  17  18      802.08     1211.30    210.65 o
  -1  17  18      712.42      597.37    165.82 o
   2  17  18     3300.51     3492.29    325.02 o
   5  17  18       14.79      -38.95     94.73 o
   8  17  18     4326.14     4752.10    386.55 o
 -27  18  18       11.92      -38.68    104.74 o
 -24  18  18       17.71      -15.95    102.07 o
 -21  18  18      979.70     1039.32    179.66 o
 -18  18  18     1452.22     1512.52    217.58 o
 -15  18  18     2165.67     2082.17    265.21 o
 -12  18  18      400.97      309.54    152.85 o
  -9  18  18     4066.94     4025.88    379.07 o
  -6  18  18     3864.94     4091.46    308.38 o
  -3  18  18      524.97      970.92    196.68 o
   0  18  18     2498.58     2778.46    303.75 o
   3  18  18     1388.24     1154.64    218.73 o
   6  18  18      355.69      319.85    145.92 o
   9  18  18     7462.39     8611.11    478.66 o
 -26  19  18       23.48       33.50    114.80 o
 -23  19  18      457.27      344.33    169.15 o
 -20  19  18      133.91      157.88    109.04 o
 -17  19  18      928.69      790.81    207.62 o
 -14  19  18     1055.26     1048.60    223.08 o
 -11  19  18        0.87      -66.70     97.67 o
  -8  19  18    12532.55    11919.80    518.83 o
  -5  19  18      915.50     1079.78    187.14 o
  -2  19  18      521.71      592.72    160.02 o
   1  19  18     2666.18     2863.67    342.20 o
   4  19  18      103.01       74.12    110.34 o
   7  19  18     3986.15     4746.73    399.29 o
 -25  20  18      512.96      386.04    166.58 o
 -22  20  18      262.68       90.17    101.54 o
 -19  20  18       27.37      -90.07     90.07 o
 -16  20  18     2029.10     1814.66    288.11 o
 -13  20  18      287.75      425.42    165.90 o
 -10  20  18     6292.74     6458.68    451.02 o
  -7  20  18    10488.80    11211.06    455.35 o
  -4  20  18       16.53       33.02    102.63 o
  -1  20  18       21.81       25.92    106.56 o
   2  20  18       35.51      -26.02     99.63 o
   5  20  18      598.60      348.41    150.36 o
 -24  21  18     3449.30     3118.92    366.65 o
 -21  21  18        6.27       11.65    117.08 o
 -18  21  18      625.17      662.93    209.21 o
 -15  21  18      538.55      303.16    156.20 o
 -12  21  18      623.12      898.68    219.77 o
  -9  21  18     7950.62     8494.96    469.97 o
  -6  21  18     1392.20     1565.96    218.37 o
  -3  21  18      904.00      811.71    188.06 o
   0  21  18      599.97      462.71    158.13 o
   3  21  18      215.55      164.64    124.15 o
 -23  22  18     2270.87     2238.74    375.17 o
 -20  22  18       48.52      209.02    140.97 o
 -17  22  18      136.60      164.72    142.30 o
 -14  22  18       74.34      -25.92    105.51 o
 -11  22  18     3538.13     4415.16    535.48 o
  -8  22  18     3831.81     3327.09    328.08 o
  -5  22  18      256.17      176.71    110.80 o
  -2  22  18     1848.15     2467.13    295.72 o
   1  22  18      703.91      442.17    163.97 o
 -25  23  18     3909.18     3703.12    969.31 o
 -22  23  18      418.70      371.86    198.40 o
 -19  23  18      127.71      -52.49    115.76 o
 -16  23  18      571.56      438.69    174.01 o
 -13  23  18     1088.03     1300.38    250.41 o
 -10  23  18     3572.10     3054.41    353.54 o
  -7  23  18      523.44      566.26    148.62 o
  -4  23  18      763.18      672.13    181.03 o
  -1  23  18     4096.35     4203.10    369.43 o
   2  23  18       70.66       72.60    117.09 o
 -24  24  18     2144.43     2369.62    383.75 o
 -21  24  18        1.67     -101.64    104.35 o
 -18  24  18     4107.39     4449.65    591.08 o
 -15  24  18     1549.90     1746.40    288.32 o
 -12  24  18     1528.45     1572.48    272.15 o
  -9  24  18      745.66      917.10    177.40 o
  -6  24  18        0.49      -36.93     85.44 o
  -3  24  18     2020.51     2273.85    309.48 o
   0  24  18      163.98      148.66    128.10 o
 -23  25  18        5.60      -57.62    132.03 o
 -20  25  18      385.97      552.32    217.41 o
 -17  25  18     3537.84     3162.45    424.47 o
 -14  25  18      415.91      488.26    179.57 o
 -11  25  18     1280.05     1270.62    253.13 o
  -8  25  18       59.72       50.82    102.12 o
  -5  25  18       17.79       45.37    102.14 o
  -2  25  18     1636.36     2211.56    336.72 o
 -19  26  18     2339.73     2331.83    378.64 o
 -16  26  18      408.47      243.63    153.88 o
 -13  26  18        8.52      125.97    132.15 o
 -10  26  18      169.64      266.43    136.67 o
  -7  26  18      165.61      225.48    120.18 o
 -18  27  18     1146.68     1497.38    318.79 o
 -15  27  18      332.28      385.21    173.79 o
 -12  27  18       95.29      127.01    126.92 o
  -9  27  18       37.02      -10.73     94.04 o
  -1   1  19     2283.27     2170.98    230.39 o
  -3   2  19     1602.49     1794.15    215.93 o
   0   2  19      515.84      383.96    127.67 o
  -5   3  19      238.34      162.87    114.19 o
  -2   3  19       65.89      150.60    103.06 o
   1   3  19       16.52       55.53     94.12 o
  -7   4  19     6872.71     7605.54    399.89 o
  -4   4  19       19.14       61.31     96.24 o
  -1   4  19     2483.99     1960.20    222.79 o
   2   4  19       14.61      -25.06     96.08 o
  -9   5  19    30970.31    32279.77    917.96 o
  -6   5  19     1297.20     1183.10    201.42 o
  -3   5  19      447.16      504.22    137.39 o
   0   5  19     4491.21     4769.03    343.51 o
   3   5  19     3846.74     4677.79    347.96 o
 -11   6  19    32392.29    34451.75   1096.17 o
  -8   6  19    12662.76    12545.90    546.37 o
  -5   6  19      715.39      660.31    147.98 o
  -2   6  19      740.05     1386.27    214.56 o
   1   6  19     3054.00     3038.42    294.61 o
   4   6  19    15090.97    13834.15    527.70 o
 -13   7  19     7646.02     8897.78    400.40 o
 -10   7  19    30636.81    31255.40    784.00 o
  -7   7  19       10.50      -68.23     88.92 o
  -4   7  19      428.11      739.51    155.59 o
  -1   7  19     3057.95     3229.69    299.22 o
   2   7  19       18.89      -24.95     89.31 o
   5   7  19     8005.46     8064.75    380.86 o
 -15   8  19        2.69      -11.48     84.68 o
 -12   8  19    21189.38    20927.63    978.29 o
  -9   8  19     1899.68     2512.52    277.58 o
  -6   8  19      448.56      183.59    114.99 o
  -3   8  19        1.78      -79.56     79.56 o
   0   8  19     2837.64     2698.26    276.52 o
   3   8  19      798.36      786.51    178.56 o
   6   8  19     1001.71     1034.74    180.12 o
 -17   9  19      229.19      273.88    128.45 o
 -14   9  19     2112.83     2221.68    245.59 o
 -11   9  19     8439.51     8629.08    389.02 o
  -8   9  19     3047.34     2409.08    265.80 o
  -5   9  19        8.52       -6.68     91.25 o
  -2   9  19        0.80       -4.40     92.78 o
   1   9  19     1697.02     1689.39    237.21 o
   4   9  19     2559.63     3236.28    301.23 o
   7   9  19        0.94      -21.13     91.49 o
 -19  10  19       26.64      -36.71     97.82 o
 -16  10  19        3.65      -72.28     72.28 o
 -13  10  19     3546.31     2924.96    271.11 o
 -10  10  19      846.71      689.47    153.50 o
  -7  10  19      666.27      938.87    217.10 o
  -4  10  19      114.09      193.32    123.13 o
  -1  10  19      191.28       75.05    106.44 o
   2  10  19      377.66      345.79    125.00 o
   5  10  19      177.17      246.20    154.72 o
   8  10  19      524.61      643.38    171.87 o
 -21  11  19      231.50      145.75    115.35 o
 -18  11  19      148.38      133.71    113.93 o
 -15  11  19      430.68      385.02    132.69 o
 -12  11  19      962.67      629.79    150.51 o
  -9  11  19     6100.32     5889.01    385.01 o
  -6  11  19        3.75       48.11     98.73 o
  -3  11  19       25.50      -11.52     94.28 o
   0  11  19     2161.83     1939.36    251.10 o
   3  11  19      224.63       85.99    102.89 o
   6  11  19       61.80       34.93     99.63 o
   9  11  19      866.30      902.82    188.28 o
 -23  12  19      766.29      695.08    181.17 o
 -20  12  19      114.05       57.62    111.29 o
 -17  12  19       63.72      175.23    109.67 o
 -14  12  19      975.36      990.71    178.72 o
 -11  12  19      759.92      785.77    163.10 o
  -8  12  19     1218.96     1755.50    270.32 o
  -5  12  19      146.72      121.57    102.82 o
  -2  12  19     1246.82     1440.42    228.38 o
   1  12  19      326.43      283.80    129.03 o
   4  12  19      528.33      194.50    120.09 o
   7  12  19      525.56      409.38    144.10 o
  10  12  19      818.65      768.92    186.56 o
 -25  13  19      338.67      212.92    132.56 o
 -22  13  19      275.04      439.56    153.04 o
 -19  13  19        3.11        9.64     97.41 o
 -16  13  19       67.67      135.57    106.85 o
 -13  13  19      547.75      729.33    159.85 o
 -10  13  19      739.16      831.30    180.79 o
  -7  13  19      138.47      183.04    130.72 o
  -4  13  19     1518.35     1658.24    240.43 o
  -1  13  19     2241.36     2289.26    301.69 o
   2  13  19     1082.10     1248.28    219.48 o
   5  13  19       54.38      -35.20     90.13 o
   8  13  19      464.15      497.24    154.37 o
  11  13  19      554.56      557.25    170.75 o
 -24  14  19      574.01      731.60    187.43 o
 -21  14  19      100.64       76.73    111.42 o
 -18  14  19     1095.59     1645.75    229.73 o
 -15  14  19      401.14      754.02    162.12 o
 -12  14  19      334.38      255.18    129.40 o
  -9  14  19      522.01      337.27    138.32 o
  -6  14  19      350.10      384.95    142.13 o
  -3  14  19     4319.91     3884.17    423.79 o
   0  14  19      109.83       68.38    103.59 o
   3  14  19     1537.03     1760.00    250.21 o
   6  14  19       27.34      -26.53     94.01 o
   9  14  19        7.15      147.03    122.89 o
  12  14  19      165.27      191.84    135.32 o
 -26  15  19       64.36       -9.34    109.73 o
 -23  15  19      826.30      869.02    197.87 o
 -20  15  19     1333.64     1638.54    248.41 o
 -17  15  19      517.30     1024.54    181.29 o
 -14  15  19     1638.10     1923.18    248.34 o
 -11  15  19        7.99       28.06    100.42 o
  -8  15  19     1260.82     1480.82    297.86 o
  -5  15  19     1767.38     1206.41    234.56 o
  -2  15  19     2113.29     2138.22    296.61 o
   1  15  19     1954.84     1785.50    247.03 o
   4  15  19       58.72       76.70    105.80 o
   7  15  19        0.53      -70.66     90.31 o
  10  15  19      732.69     1268.17    230.94 o
 -25  16  19      191.95       63.40    115.20 o
 -22  16  19      833.33      990.57    204.07 o
 -19  16  19     1728.58     2199.17    257.74 o
 -16  16  19      301.89      401.66    137.49 o
 -13  16  19      487.84       49.97    107.66 o
 -10  16  19     1960.18     1635.20    267.50 o
  -7  16  19       22.09      -49.35    105.60 o
  -4  16  19     3751.87     4571.46    459.71 o
  -1  16  19      486.47      605.72    170.61 o
   2  16  19       26.04      -57.26     92.48 o
   5  16  19       83.35      -12.95     98.29 o
   8  16  19     2073.84     2415.95    327.87 o
 -24  17  19      340.94      226.87    137.52 o
 -21  17  19      977.81     1184.23    220.51 o
 -18  17  19      430.75      329.21    126.67 o
 -15  17  19     1177.04     1421.80    233.01 o
 -12  17  19      113.41       69.37    114.14 o
  -9  17  19      380.81      275.29    144.98 o
  -6  17  19      233.07      270.80    149.96 o
  -3  17  19      116.08       27.54    102.88 o
   0  17  19       95.51       89.68    125.22 o
   3  17  19      442.39      371.19    148.26 o
   6  17  19     1140.28     1320.85    233.65 o
 -23  18  19        1.84      -21.88    107.31 o
 -20  18  19      481.74      324.95    131.25 o
 -17  18  19       25.98      142.13    119.80 o
 -14  18  19      119.59      133.56    132.03 o
 -11  18  19      129.02       10.38    110.05 o
  -8  18  19     3434.94     3550.26    367.99 o
  -5  18  19      575.85      847.86    213.72 o
  -2  18  19      534.13      707.00    178.23 o
   1  18  19      719.70      883.91    200.17 o
   4  18  19        3.03      -54.11     99.73 o
   7  18  19     5590.36     6749.09    702.44 o
 -25  19  19        4.29        6.86    114.06 o
 -22  19  19      442.10      346.28    150.93 o
 -19  19  19        1.48      105.07    117.04 o
 -16  19  19        5.97       94.90    118.44 o
 -13  19  19       41.54      -18.14    110.93 o
 -10  19  19     1822.84     2013.69    298.70 o
  -7  19  19     7893.01     8705.99    539.71 o
  -4  19  19     1336.25     1411.86    233.49 o
  -1  19  19       20.86      -44.96     99.71 o
   2  19  19      410.35      281.38    137.84 o
   5  19  19     1300.79     1297.30    232.05 o
 -24  20  19     1392.24     1371.52    267.22 o
 -21  20  19      403.38      146.13    133.40 o
 -18  20  19        4.26      -33.04    109.16 o
 -15  20  19        5.77       85.35    121.93 o
 -12  20  19      155.99      120.07    137.43 o
  -9  20  19     7916.97     7588.79    567.29 o
  -6  20  19     4750.58     5543.16    444.29 o
  -3  20  19      938.47     1017.45    205.10 o
   0  20  19      298.47      323.17    143.52 o
   3  20  19        4.65       56.27    104.03 o
 -23  21  19     3352.35     2740.16    493.27 o
 -20  21  19      137.09       32.51    115.35 o
 -17  21  19      428.63      354.48    161.65 o
 -14  21  19       82.12       53.59    120.44 o
 -11  21  19     3651.34     3754.68    378.55 o
  -8  21  19     6501.53     6866.48    472.42 o
  -5  21  19     1473.20     1572.52    247.53 o
  -2  21  19       30.86      -85.58     87.01 o
   1  21  19       24.54       11.56    101.69 o
 -22  22  19     1542.53     1504.03    324.29 o
 -19  22  19      270.27      138.59    138.28 o
 -16  22  19       53.19      -66.96    106.50 o
 -13  22  19      392.62      479.02    176.44 o
 -10  22  19     6299.94     6367.29    471.29 o
  -7  22  19     2665.95     3187.30    362.70 o
  -4  22  19      157.97      138.80    124.50 o
  -1  22  19      578.88      585.23    170.58 o
 -21  23  19        0.93       62.54    141.05 o
 -18  23  19       50.33      100.86    133.43 o
 -15  23  19        6.09      -13.32    137.63 o
 -12  23  19     1407.76     1579.95    275.38 o
  -9  23  19     4342.66     4074.86    400.91 o
  -6  23  19      162.66       65.08    112.21 o
  -3  23  19      119.21       -4.60    102.75 o
 -20  24  19      114.60       13.67    139.89 o
 -17  24  19      701.16      458.23    182.41 o
 -14  24  19      354.92      320.18    160.05 o
 -11  24  19     3278.16     3737.17    387.03 o
  -8  24  19      603.14      532.54    171.65 o
  -5  24  19       27.72       70.93    115.60 o
 -19  25  19      118.70      181.81    163.31 o
 -16  25  19      506.80      724.48    206.17 o
 -13  25  19      194.13      208.88    138.95 o
 -10  25  19     2073.99     1857.97    293.94 o
  -7  25  19       79.07       66.11    114.37 o
 -15  26  19        4.72        5.82    114.27 o
 -12  26  19      326.83      543.36    187.14 o
   0   1  20     8722.43     9243.44    398.82 o
  -2   2  20     9410.31    10200.17    415.16 o
   1   2  20     4527.43     3665.42    289.65 o
  -4   3  20     1702.43     1621.07    229.89 o
  -1   3  20     2496.34     2906.63    268.20 o
   2   3  20      620.25      655.03    169.23 o
  -6   4  20     2437.29     2171.70    265.17 o
  -3   4  20      595.89      412.66    132.52 o
   0   4  20      372.61      327.30    138.86 o
   3   4  20     1431.74     1702.36    240.17 o
  -8   5  20    10123.33     9162.99    440.13 o
  -5   5  20        9.66      -35.26     97.94 o
  -2   5  20        0.55      -61.00     91.13 o
   1   5  20     2013.04     2450.78    279.11 o
   4   5  20     6622.67     6584.75    395.03 o
 -10   6  20    14762.92    13938.74    540.04 o
  -7   6  20     1771.83     1890.30    252.32 o
  -4   6  20      304.19      302.59    120.05 o
  -1   6  20     2189.53     2649.51    283.86 o
   2   6  20       34.71      155.55    120.17 o
   5   6  20     6379.97     6656.81    407.03 o
 -12   7  20     7685.88     7645.52    421.90 o
  -9   7  20     7696.52     7726.91    413.00 o
  -6   7  20      187.81      113.07    114.34 o
  -3   7  20      161.24      306.17    137.38 o
   0   7  20     1954.90     2282.72    268.23 o
   3   7  20      302.08      133.95    120.56 o
   6   7  20     1877.38     1967.53    254.81 o
 -14   8  20      762.88      571.25    148.78 o
 -11   8  20     7203.01     8187.11    423.39 o
  -8   8  20       54.79      -34.94     91.25 o
  -5   8  20      356.60       94.65    124.30 o
  -2   8  20      321.49      306.35    134.23 o
   1   8  20      131.76       49.59    102.41 o
   4   8  20      580.53      683.16    174.00 o
   7   8  20       14.95       -6.80     85.93 o
 -16   9  20       19.52       -3.60     90.79 o
 -13   9  20     1769.00     1301.49    199.85 o
 -10   9  20      986.66      877.80    185.46 o
  -7   9  20     1668.91     2043.12    292.95 o
  -4   9  20       98.08      101.54    110.72 o
  -1   9  20      131.78      125.78    108.32 o
   2   9  20      682.15      714.14    176.47 o
   5   9  20      315.61      150.40    126.72 o
   8   9  20       56.04       50.70    103.85 o
 -18  10  20        0.07      -14.42     94.66 o
 -15  10  20       65.69      -28.77     86.28 o
 -12  10  20     1710.55     2007.03    263.76 o
  -9  10  20     2163.92     2352.84    274.08 o
  -6  10  20      460.33      560.99    180.34 o
  -3  10  20      446.45      439.12    147.03 o
   0  10  20      552.11      746.04    180.02 o
   3  10  20        3.99       93.53    120.25 o
   6  10  20      179.52      109.82    115.54 o
   9  10  20      640.84      534.91    162.69 o
 -20  11  20       57.62      108.14    117.37 o
 -17  11  20       83.50       59.41     99.64 o
 -14  11  20      876.14     1321.05    206.29 o
 -11  11  20        8.15       97.91    109.00 o
  -8  11  20     2814.04     2618.30    323.82 o
  -5  11  20      996.94     1113.31    232.88 o
  -2  11  20     1219.32      900.03    192.06 o
   1  11  20       96.25      103.58    119.07 o
   4  11  20      466.92      700.03    175.54 o
   7  11  20      147.64      101.47    113.29 o
  10  11  20      576.73      640.44    177.88 o
 -22  12  20      623.98      626.51    175.48 o
 -19  12  20      245.58      206.32    123.45 o
 -16  12  20       20.60      -55.25     88.03 o
 -13  12  20     1850.19     2089.24    242.32 o
 -10  12  20      942.15      963.28    218.04 o
  -7  12  20     1974.82     1659.21    274.13 o
  -4  12  20     2524.56     2326.15    275.78 o
  -1  12  20     1471.70     1400.72    254.57 o
   2  12  20     1371.02     1632.86    266.29 o
   5  12  20      768.76      869.26    191.52 o
   8  12  20      586.87      579.29    165.59 o
  11  12  20     1266.08     1375.86    234.28 o
 -24  13  20     1590.79     1436.97    244.95 o
 -21  13  20       42.19       61.59    113.45 o
 -18  13  20       28.56      -12.74     90.14 o
 -15  13  20     1048.21      777.79    165.87 o
 -12  13  20     1441.66     1488.07    237.33 o
  -9  13  20      668.23      900.74    214.69 o
  -6  13  20     1765.15     2028.68    294.72 o
  -3  13  20     3980.77     4161.02    381.28 o
   0  13  20     1134.40      958.76    219.72 o
   3  13  20     5197.88     5583.61    391.59 o
   6  13  20       42.62        8.47    100.77 o
   9  13  20       54.44       58.45    112.44 o
 -23  14  20     1157.70     1008.29    212.06 o
 -20  14  20      181.30      131.21    127.29 o
 -17  14  20      820.04      742.68    166.88 o
 -14  14  20     6074.84     6261.46    414.29 o
 -11  14  20     1006.10      829.63    208.62 o
  -8  14  20     1203.75     1149.84    231.53 o
  -5  14  20     1505.57     2113.81    299.00 o
  -2  14  20      991.85     1087.00    230.94 o
   1  14  20     9199.68     9290.53    540.04 o
   4  14  20     1674.62     1754.94    247.53 o
   7  14  20      214.67      199.40    131.30 o
  10  14  20      291.33      319.80    144.91 o
 -22  15  20      665.08      552.50    170.21 o
 -19  15  20     1175.02     1264.96    207.97 o
 -16  15  20      366.16      238.49    122.23 o
 -13  15  20     8724.97     9139.83    460.93 o
 -10  15  20        5.11       80.88    127.23 o
  -7  15  20      689.35      638.40    226.87 o
  -4  15  20     3094.26     2892.87    340.65 o
  -1  15  20     2742.64     1952.17    290.05 o
   2  15  20     4796.01     5058.09    382.50 o
   5  15  20      335.08      133.00    116.66 o
   8  15  20      398.03      912.62    205.40 o
 -21  16  20      730.75      669.84    207.37 o
 -18  16  20      459.43      351.59    137.96 o
 -15  16  20     8345.90     8602.56    455.91 o
 -12  16  20     5014.03     5811.96    406.52 o
  -9  16  20     1515.37     1851.31    326.90 o
  -6  16  20      515.82      464.17    201.67 o
  -3  16  20       43.49      -13.53    108.81 o
   0  16  20     5217.23     4517.21    405.68 o
   3  16  20      217.22      143.84    123.46 o
   6  16  20     1147.45     1040.96    210.79 o
 -23  17  20      363.23      382.40    147.41 o
 -20  17  20      410.55      446.39    146.85 o
 -17  17  20      749.31      556.31    169.90 o
 -14  17  20     8230.33     9592.05    531.03 o
 -11  17  20       79.39       17.23    143.56 o
  -8  17  20      120.01      100.58    154.00 o
  -5  17  20        5.20      -27.51    112.90 o
  -2  17  20     1791.38     2096.07    301.29 o
   1  17  20      696.16      535.50    187.24 o
   4  17  20      162.26       48.47    116.70 o
 -22  18  20        0.43       45.44    110.58 o
 -19  18  20       42.49       32.14    111.01 o
 -16  18  20     1430.76     1565.72    280.74 o
 -13  18  20     3098.24     3442.91    377.87 o
 -10  18  20        1.61       44.66    138.97 o
  -7  18  20     1391.92     1442.14    305.55 o
  -4  18  20     1196.86     1549.77    268.16 o
  -1  18  20     1837.22     1705.39    279.86 o
   2  18  20        4.96       12.50    105.93 o
   5  18  20     2046.37     2249.75    284.21 o
 -21  19  20      143.22       41.71    112.10 o
 -18  19  20     1090.35     1210.23    252.37 o
 -15  19  20     1090.51      794.60    210.38 o
 -12  19  20      109.08       92.34    129.54 o
  -9  19  20     1547.33     2199.91    364.54 o
  -6  19  20     4058.93     4109.54    499.93 o
  -3  19  20     1689.63     2303.90    319.31 o
   0  19  20       48.94       23.07    108.30 o
   3  19  20       67.29        1.12    103.47 o
 -20  20  20     1340.10     1416.49    267.98 o
 -17  20  20       59.37      -38.34    103.11 o
 -14  20  20      221.09      189.63    141.09 o
 -11  20  20      795.42      553.14    188.73 o
  -8  20  20     4456.61     4483.02    475.53 o
  -5  20  20     2625.24     2880.16    352.07 o
  -2  20  20      265.36      284.66    139.03 o
   1  20  20        0.01      -14.56    100.93 o
 -19  21  20      667.12      883.79    223.23 o
 -16  21  20       38.09      -37.19    106.46 o
 -13  21  20      311.40      381.29    162.39 o
 -10  21  20     2189.93     2054.06    342.00 o
  -7  21  20     3222.86     2858.78    355.26 o
  -4  21  20      384.42      587.02    190.20 o
  -1  21  20       59.33        8.85    104.51 o
 -18  22  20        3.02      114.96    134.32 o
 -15  22  20       32.84      -94.16    100.32 o
 -12  22  20      261.77      350.90    165.12 o
  -9  22  20     3014.72     3263.28    424.64 o
  -6  22  20      388.65      422.29    183.17 o
  -3  22  20        0.71      -53.67     96.64 o
 -17  23  20        1.26       20.01    119.26 o
 -14  23  20        8.07      -45.43    114.83 o
 -11  23  20      660.51      678.03    200.70 o
  -8  23  20      506.56      297.24    177.08 o
  -5  23  20       41.44       25.10    122.52 o
 -13  24  20        0.29      -67.90    107.10 o
 -10  24  20      689.14      787.05    247.61 o
   0   0  21    12380.90    11985.00    797.00 o
   1   1  21    10643.39    11158.35    447.25 o
  -1   2  21    10841.68    12332.26    466.07 o
   2   2  21     3898.42     4571.97    355.34 o
  -3   3  21     4314.49     4070.55    342.19 o
   0   3  21     1547.18     1532.55    234.55 o
   3   3  21     1923.60     1757.48    245.09 o
  -5   4  21     1254.95     1408.18    228.50 o
  -2   4  21     1128.78      939.92    192.93 o
   1   4  21       50.89       59.04    112.40 o
   4   4  21      856.57      963.38    193.75 o
  -7   5  21     1030.52     1139.35    207.64 o
  -4   5  21       30.56       97.61    111.74 o
  -1   5  21      148.44       70.15    109.12 o
   2   5  21       34.63      146.76    119.46 o
   5   5  21      218.14      291.33    135.46 o
  -9   6  21     1467.64     1286.83    217.67 o
  -6   6  21       46.21       19.72    100.77 o
  -3   6  21        4.86        2.23     99.68 o
   0   6  21      677.48      487.54    155.95 o
   3   6  21       24.60      -24.64     96.68 o
   6   6  21       46.54      -17.51     99.92 o
 -11   7  21      241.15      209.00    130.34 o
  -8   7  21       87.41       39.03    108.71 o
  -5   7  21       55.43       13.01    107.74 o
  -2   7  21       52.08      146.53    113.87 o
   1   7  21       31.98       31.40    106.93 o
   4   7  21        0.39      -16.66    100.08 o
   7   7  21      959.68      731.95    179.90 o
 -13   8  21      548.66      697.10    177.36 o
 -10   8  21      999.82      858.45    191.43 o
  -7   8  21      261.11      303.46    150.84 o
  -4   8  21      261.34      364.92    158.16 o
  -1   8  21      197.43      552.51    161.03 o
   2   8  21       85.64       -1.05    100.25 o
   5   8  21       51.22       54.20    106.12 o
   8   8  21       75.19      -36.35    110.33 o
 -15   9  21      216.68      313.33    143.81 o
 -12   9  21      239.62      449.21    152.11 o
  -9   9  21      113.28      138.31    112.99 o
  -6   9  21       12.20        0.85    111.17 o
  -3   9  21      208.53       26.83    107.13 o
   0   9  21        1.92       76.43    110.58 o
   3   9  21       85.87       75.16    114.61 o
   6   9  21       62.64      -35.39    110.76 o
   9   9  21      110.43      146.86    118.98 o
 -17  10  21      307.96      247.64    136.06 o
 -14  10  21       43.06      -17.13     94.96 o
 -11  10  21      359.18      370.15    142.51 o
  -8  10  21      459.79      348.77    160.07 o
  -5  10  21       48.92      -43.51    105.82 o
  -2  10  21       19.93       83.02    111.08 o
   1  10  21        7.16       26.55    108.74 o
   4  10  21      379.80      366.67    160.86 o
   7  10  21        7.35       41.70    123.04 o
  10  10  21      340.24      402.45    154.64 o
 -19  11  21     1216.35      865.24    194.20 o
 -16  11  21       10.54      -56.36     94.16 o
 -13  11  21      861.02      718.65    176.90 o
 -10  11  21       19.48      -24.16    111.38 o
  -7  11  21      191.95       58.60    127.17 o
  -4  11  21       27.75      -10.68    104.70 o
  -1  11  21      381.92      495.63    157.23 o
   2  11  21      954.90      674.10    197.12 o
   5  11  21      901.31      751.94    199.62 o
   8  11  21        3.78      -10.75    100.07 o
  11  11  21      293.96      216.60    137.47 o
 -21  12  21      353.24      359.78    152.48 o
 -18  12  21      906.15      572.55    171.86 o
 -15  12  21      254.43      175.90    124.89 o
 -12  12  21     1527.55     1289.81    244.43 o
  -9  12  21      229.99       48.12    119.57 o
  -6  12  21      531.89      389.22    165.19 o
  -3  12  21      793.74      693.55    176.13 o
   0  12  21      293.47      148.18    132.69 o
   3  12  21     4469.16     4438.61    406.88 o
   6  12  21      285.74      245.08    150.82 o
   9  12  21        1.58      -84.85     90.22 o
 -20  13  21      611.69      610.82    173.90 o
 -17  13  21        6.34      -61.56     87.74 o
 -14  13  21     3182.53     3191.53    380.08 o
 -11  13  21     1774.69     1402.57    260.95 o
  -8  13  21      753.26      640.28    188.77 o
  -5  13  21      767.30     1254.50    287.03 o
  -2  13  21      988.98     1050.21    224.46 o
   1  13  21     6050.90     5205.91    426.80 o
   4  13  21     3377.70     2875.99    346.29 o
   7  13  21      452.18      510.88    166.70 o
 -19  14  21        5.59      -93.58     94.61 o
 -16  14  21      180.66      183.98    124.02 o
 -13  14  21     7912.45     8325.66    605.66 o
 -10  14  21      424.60      427.78    174.44 o
  -7  14  21      536.83      706.28    239.38 o
  -4  14  21     1378.20     1349.20    254.47 o
  -1  14  21     1249.12     1136.34    235.79 o
   2  14  21    10093.58    11333.51    823.42 o
   5  14  21     1766.00     1505.70    246.67 o
 -21  15  21       28.81      112.57    123.11 o
 -18  15  21      148.39      -49.23     85.74 o
 -15  15  21     5424.01     5491.98    455.27 o
 -12  15  21     8123.22     8766.43    508.62 o
  -9  15  21       61.45      -48.59    124.03 o
  -6  15  21      301.80      537.83    212.55 o
  -3  15  21      109.51       74.46    123.79 o
   0  15  21     7501.61     8285.05    587.95 o
   3  15  21     3625.99     3294.76    363.79 o
   6  15  21     1033.52     1109.19    216.72 o
 -20  16  21      405.67      440.32    156.21 o
 -17  16  21      998.90      667.10    182.88 o
 -14  16  21    10291.48    12239.92    605.13 o
 -11  16  21     2222.91     2025.44    351.44 o
  -8  16  21      382.27      463.93    201.77 o
  -5  16  21       27.11       61.06    133.19 o
  -2  16  21     1011.03     1013.57    231.10 o
   1  16  21     4789.09     4949.48    469.49 o
   4  16  21      911.13      820.18    194.98 o
 -19  17  21       11.71       15.82    110.71 o
 -16  17  21     4736.72     5115.78    401.91 o
 -13  17  21     7415.62     7740.01    779.61 o
 -10  17  21        0.48      -37.52    121.58 o
  -7  17  21        3.75      -79.45    122.05 o
  -4  17  21      239.01      239.43    151.30 o
  -1  17  21     3071.02     3016.04    353.21 o
   2  17  21      809.93      842.05    220.70 o
 -18  18  21     2316.25     2393.12    338.76 o
 -15  18  21     2710.30     3203.40    377.17 o
 -12  18  21      683.02      591.84    226.35 o
  -9  18  21       23.29      -90.72    117.01 o
  -6  18  21     1240.89     1295.04    360.31 o
  -3  18  21      730.71      418.79    170.11 o
   0  18  21     1327.11     1361.88    259.43 o
 -17  19  21     1534.34     2112.54    321.97 o
 -14  19  21      594.03      328.11    193.55 o
 -11  19  21      105.89       37.51    141.88 o
  -8  19  21     1030.22     1184.75    287.11 o
  -5  19  21     1792.07     1711.89    288.12 o
  -2  19  21      774.83      862.61    218.24 o
 -16  20  21      550.00      749.17    206.79 o
 -13  20  21       19.08       34.38    143.56 o
 -10  20  21      298.56      252.94    186.31 o
  -7  20  21     1745.55     1590.26    314.53 o
  -4  20  21      511.86      485.00    178.09 o
 -15  21  21       17.77       49.03    123.36 o
 -12  21  21        6.42      136.05    155.60 o
  -9  21  21      633.31      794.31    242.83 o
  -6  21  21      204.42      463.59    180.67 o
 -11  22  21        3.32      140.62    156.40 o
  -1   1  22     4703.47     4906.88    341.32 o
  -3   2  22     3006.81     2950.60    310.25 o
   0   2  22     3262.60     3730.55    332.50 o
  -5   3  22      836.73      779.38    188.32 o
  -2   3  22     2711.63     2985.39    344.23 o
   1   3  22      287.49      450.30    154.68 o
  -7   4  22        1.99      -54.89     94.64 o
  -4   4  22      713.83      759.07    187.10 o
  -1   4  22      149.32       82.87    116.69 o
   2   4  22      169.51      251.09    132.18 o
  -9   5  22       70.12      119.37    111.79 o
  -6   5  22       20.91      121.84    118.47 o
  -3   5  22       24.57      -50.10    105.11 o
   0   5  22      425.77      329.72    143.51 o
   3   5  22      107.07      -19.20     94.67 o
 -11   6  22      310.73      284.14    141.25 o
  -8   6  22       31.20      -26.68     96.69 o
  -5   6  22       31.29      -23.46    106.18 o
  -2   6  22       51.66       29.54    105.47 o
   1   6  22      537.41      344.13    149.54 o
   4   6  22       86.96      136.56    119.63 o
 -13   7  22     3237.51     2681.41    308.26 o
 -10   7  22        1.24      -56.40     91.05 o
  -7   7  22      298.21      251.75    149.55 o
  -4   7  22     1199.22     1453.40    263.33 o
  -1   7  22      209.70      242.26    135.62 o
   2   7  22      308.83      236.99    132.01 o
   5   7  22      714.13      693.58    180.65 o
 -15   8  22     1887.70     1861.31    298.88 o
 -12   8  22     1179.52     1312.86    226.64 o
  -9   8  22       99.26       25.76    121.03 o
  -6   8  22      286.49      483.56    187.63 o
  -3   8  22     2155.89     2450.83    324.55 o
   0   8  22      239.92      326.84    143.62 o
   3   8  22      146.55      263.17    133.50 o
   6   8  22     1587.81     1502.81    270.32 o
 -17   9  22       49.64       95.73    131.83 o
 -14   9  22     1529.86     1982.53    275.04 o
 -11   9  22       77.44       34.72    109.56 o
  -8   9  22       51.93      112.01    134.06 o
  -5   9  22     3148.27     3290.37    364.92 o
  -2   9  22     2527.92     2677.25    299.86 o
   1   9  22        3.04      -72.22     91.96 o
   4   9  22       86.91       99.17    123.64 o
   7   9  22      264.50      230.30    151.81 o
 -19  10  22     1762.57     1640.10    285.32 o
 -16  10  22        0.94     -101.44    101.44 o
 -13  10  22       57.72      230.60    133.43 o
 -10  10  22       36.31       44.75    118.65 o
  -7  10  22      731.57      687.46    199.29 o
  -4  10  22     3520.12     3573.09    378.65 o
  -1  10  22      638.04      560.29    168.81 o
   2  10  22      132.81      122.48    127.86 o
   5  10  22      115.90       82.64    131.67 o
   8  10  22      295.24      440.86    177.09 o
 -18  11  22     2240.47     3021.31    404.68 o
 -15  11  22       10.15       56.19    114.94 o
 -12  11  22        2.94        5.49    119.82 o
  -9  11  22       92.43       88.28    125.20 o
  -6  11  22     1804.02     1813.25    288.13 o
  -3  11  22     2410.18     2425.49    328.90 o
   0  11  22      199.97      309.25    159.54 o
   3  11  22     1327.80     1344.76    254.68 o
   6  11  22      706.88      780.07    206.28 o
 -17  12  22      747.23      740.80    211.10 o
 -14  12  22      559.27      755.32    204.49 o
 -11  12  22      260.10      337.97    167.11 o
  -8  12  22       67.01      -33.29    128.51 o
  -5  12  22     1875.31     2180.94    316.68 o
  -2  12  22       10.96       53.36    124.15 o
   1  12  22     1351.01     1312.63    256.68 o
   4  12  22     2485.67     2989.06    356.45 o
   7  12  22      527.43      573.18    193.52 o
 -19  13  22     1509.05     1557.64    281.22 o
 -16  13  22      397.24      368.59    176.56 o
 -13  13  22     1507.88     2141.02    313.44 o
 -10  13  22      560.46      780.51    213.98 o
  -7  13  22      176.89       26.92    125.16 o
  -4  13  22      100.85      257.55    174.58 o
  -1  13  22       66.44       81.63    131.19 o
   2  13  22     4099.50     4631.44    420.30 o
   5  13  22     2091.08     2464.76    328.52 o
 -18  14  22      115.04       28.47    130.03 o
 -15  14  22     1744.00     2363.90    330.35 o
 -12  14  22     2541.75     1949.36    298.39 o
  -9  14  22      104.09      260.26    167.44 o
  -6  14  22      431.23      376.29    184.38 o
  -3  14  22      374.17      360.51    170.10 o
   0  14  22     2111.74     2325.52    338.60 o
   3  14  22     3727.53     4086.46    400.13 o
 -17  15  22      239.86      143.94    148.78 o
 -14  15  22     4096.48     4394.53    422.30 o
 -11  15  22     1461.84     1430.10    313.07 o
  -8  15  22      121.64       42.09    138.43 o
  -5  15  22       37.73        7.66    140.81 o
  -2  15  22        9.73      -35.37    106.76 o
   1  15  22     3770.84     3555.63    380.46 o
 -16  16  22     2679.36     3058.28    360.74 o
 -13  16  22     3922.94     3407.25    438.74 o
 -10  16  22       44.51       49.54    148.22 o
  -7  16  22      284.32      517.15    216.82 o
  -4  16  22      112.29       98.15    156.87 o
  -1  16  22     1366.98     1156.38    249.05 o
 -15  17  22     3491.71     4377.94    488.05 o
 -12  17  22      289.06      297.89    186.43 o
  -9  17  22        9.44      -26.41    136.21 o
  -6  17  22      141.95       72.82    151.24 o
  -3  17  22        2.98       -7.75    116.72 o
   0  17  22     1049.50     1168.40    369.41 o
 -14  18  22      783.53      818.78    254.36 o
 -11  18  22       52.83       14.92    131.83 o
  -8  18  22      190.04      221.48    173.03 o
  -5  18  22      117.85      143.96    155.46 o
 -13  19  22      180.01      131.99    158.37 o
 -10  19  22        6.95      -16.69    135.45 o
  -7  19  22      383.65      278.65    181.77 o
   0   1  23      824.21      905.83    199.57 o
  -2   2  23      234.76      314.71    156.34 o
   1   2  23      102.60       13.58    111.35 o
  -4   3  23       52.23       25.92    108.46 o
  -1   3  23      140.80       40.50    129.51 o
   2   3  23     1087.38     1569.37    248.57 o
  -6   4  23      313.38      348.56    151.73 o
  -3   4  23       11.03     -104.06    104.06 o
   0   4  23      559.52      697.26    178.93 o
   3   4  23      463.22      578.56    174.60 o
  -8   5  23        6.98      -28.58     95.55 o
  -5   5  23       63.43       85.00    135.56 o
  -2   5  23      137.20       73.02    137.87 o
   1   5  23     1127.22     1147.83    216.01 o
   4   5  23       75.25      144.53    123.02 o
 -10   6  23      363.69      169.07    129.95 o
  -7   6  23      162.25       83.69    128.54 o
  -4   6  23      107.68       58.45    132.53 o
  -1   6  23       77.39      232.99    157.78 o
   2   6  23      186.36       73.25    116.09 o
   5   6  23       40.49      -47.60     99.81 o
 -12   7  23       67.67       75.51    115.80 o
  -9   7  23        1.30      -14.98    117.55 o
  -6   7  23       32.38      -59.10    111.09 o
  -3   7  23     1212.44     1184.86    245.61 o
   0   7  23      129.13       48.76    118.80 o
   3   7  23        9.76        1.15    106.02 o
   6   7  23      564.38      876.94    200.51 o
 -14   8  23      647.21     1054.82    215.60 o
 -11   8  23       22.96       53.13    112.01 o
  -8   8  23       43.37      138.40    138.00 o
  -5   8  23     2874.19     3058.52    460.28 o
  -2   8  23     3217.69     3177.63    365.99 o
   1   8  23       45.66      -31.71    105.87 o
   4   8  23      497.98      754.49    184.78 o
   7   8  23      479.13      482.89    180.47 o
 -16   9  23        5.78      -37.13    121.28 o
 -13   9  23      183.51      252.72    139.16 o
 -10   9  23      281.44      346.99    170.54 o
  -7   9  23      599.35      471.81    182.50 o
  -4   9  23     6757.03     7665.47    587.34 o
  -1   9  23     2376.58     2128.44    284.90 o
   2   9  23       41.79      -48.71    113.56 o
   5   9  23      640.13      573.20    193.48 o
 -15  10  23        2.60       99.25    123.48 o
 -12  10  23      373.64      383.43    169.46 o
  -9  10  23        8.36      -55.74    112.57 o
  -6  10  23     4099.80     3742.16    387.18 o
  -3  10  23     8537.66    10063.88    552.99 o
   0  10  23      177.15      176.04    143.21 o
   3  10  23      175.87      267.83    155.52 o
   6  10  23        1.85      112.27    135.81 o
 -14  11  23       24.65       27.67    126.84 o
 -11  11  23      563.07      497.51    186.60 o
  -8  11  23      471.19      486.08    188.35 o
  -5  11  23     9541.23     9606.16    619.94 o
  -2  11  23     1569.42     1846.84    380.34 o
   1  11  23       86.81      -78.36    104.49 o
   4  11  23       90.67       42.03    120.69 o
 -13  12  23       46.00       31.29    127.70 o
 -10  12  23       20.28      -60.37    109.41 o
  -7  12  23     2435.40     2157.03    318.31 o
  -4  12  23     6196.75     5645.36    643.26 o
  -1  12  23       26.61      -41.92    112.00 o
   2  12  23      487.92      746.46    209.58 o
 -15  13  23       43.58      -59.85    114.46 o
 -12  13  23        5.85       60.87    134.79 o
  -9  13  23      125.04       98.83    137.82 o
  -6  13  23     5373.86     6122.99    541.75 o
  -3  13  23       84.73       73.93    164.48 o
   0  13  23      179.80      194.16    143.99 o
 -14  14  23      372.41      373.73    172.17 o
 -11  14  23      109.76      173.08    146.45 o
  -8  14  23      798.43      643.07    305.62 o
  -5  14  23     1633.02     1772.70    344.97 o
  -2  14  23      333.11      445.01    209.86 o
 -13  15  23      916.30      992.85    273.95 o
 -10  15  23        6.63      -15.22    133.17 o
  -7  15  23     1842.76     1943.88    348.94 o
  -4  15  23       51.82      105.44    165.03 o
  -9  16  23       73.77       75.47    152.52 o
  -6  16  23      246.81      129.36    164.58 o
   0   0  24      327.43      170.50    312.58 o
   1   1  24      331.18      290.15    195.40 o
  -1   2  24      134.07       83.08    134.71 o
   2   2  24     2112.75     2058.65    308.74 o
  -3   3  24      541.53      588.88    199.40 o
   0   3  24     1389.83     1467.10    268.18 o
   3   3  24      852.18      702.31    183.36 o
  -5   4  24      494.76      297.58    164.67 o
  -2   4  24      676.05      435.07    182.77 o
   1   4  24     1523.53     1573.68    251.62 o
   4   4  24      272.86      265.26    144.07 o
  -7   5  24        1.37      -31.39    120.44 o
  -4   5  24      108.12       75.74    135.26 o
  -1   5  24      972.03      888.51    228.46 o
   2   5  24      120.08      167.84    132.75 o
   5   5  24     1878.88     2237.09    294.60 o
  -9   6  24     1395.53     1460.43    279.32 o
  -6   6  24        5.85       20.13    122.37 o
  -3   6  24       19.00       97.07    144.29 o
   0   6  24       50.60      132.03    141.93 o
   3   6  24      367.86      260.25    149.30 o
   6   6  24      747.62      715.08    192.18 o
 -11   7  24     1967.49     2041.02    276.62 o
  -8   7  24      108.78       66.70    135.29 o
  -5   7  24      535.95      694.88    204.89 o
  -2   7  24      373.59      614.65    199.93 o
   1   7  24      214.17      222.89    138.18 o
   4   7  24      203.04      195.28    139.38 o
 -10   8  24      324.66      383.89    181.99 o
  -7   8  24      259.27      -35.90    120.85 o
  -4   8  24     2708.22     2931.33    366.67 o
  -1   8  24     1982.42     2199.03    328.22 o
   2   8  24      177.15       78.00    127.12 o
 -12   9  24      337.86      266.37    159.34 o
  -9   9  24        1.22      -60.25    115.53 o
  -6   9  24     1898.78     1624.54    326.51 o
  -3   9  24     6468.72     7788.71    522.01 o
   0   9  24      730.00      797.79    198.40 o
   3   9  24       26.76       86.21    159.08 o
 -11  10  24      112.56       42.72    128.51 o
  -8  10  24      131.29      166.97    145.84 o
  -5  10  24     6375.40     7233.30    582.64 o
  -2  10  24     3079.90     2781.45    353.86 o
   1  10  24       52.24      128.57    143.43 o
 -10  11  24      226.76      127.41    149.81 o
  -7  11  24     1243.18     1483.57    281.29 o
  -4  11  24     7836.23     8430.58    602.76 o
  -1  11  24      199.56      190.70    180.22 o
  -9  12  24       30.67      -10.93    119.27 o
  -6  12  24     5015.53     5763.72    539.75 o
  -3  12  24     1197.57     1303.21    368.88 o
  -1   1  25       79.88      194.81    179.07 o
  -3   2  25      612.59      585.81    235.95 o
   0   2  25      733.31      597.09    234.71 o
  -5   3  25      434.75      581.88    192.84 o
  -2   3  25      640.40      703.71    212.95 o
   1   3  25      993.91     1134.65    289.95 o
  -4   4  25      124.31       39.59    131.90 o
  -1   4  25      846.41     1083.72    253.07 o
   2   4  25       97.28      104.01    131.29 o
  -3   5  25      173.15      192.54    171.35 o
   0   5  25      301.96      430.27    189.95 o
  -2   6  25      200.88      154.59    152.27 o
 
